# Supplementary material for: Evaluation of the New Individual Fatty Acid Dataset for UK Biobank: Analysis of Intakes and Sources in 207,997 Participants
Source: MDPI journal article supplement (doi:10.3390/nu14173603), 2022-08-31
Supplement: s1 [file s1]

**Table S2.** Description of the MCW food codes (n=8) with implausible individual FA values that were identified and corrected by tracing back to the original data source (n=2) or replaced with other MCW/USDA food codes (n=6).

| Food code | Food code description                 | Issue                                                                                                                                                                                                                                                                                                                                                                                   | Resolution                                                                                                                                                                                                                                                                                      |
|-----------|---------------------------------------|-----------------------------------------------------------------------------------------------------------------------------------------------------------------------------------------------------------------------------------------------------------------------------------------------------------------------------------------------------------------------------------------|-------------------------------------------------------------------------------------------------------------------------------------------------------------------------------------------------------------------------------------------------------------------------------------------------|
| 12-344    | Cheese, Brie, with outer rind removed | Total PUFAs were reported as 0.60 g/100g food; however, the sum of individual PUFAs was 0.97 g/100g food (1.62 times higher).                                                                                                                                                                                                                                                           | Replaced with Port Salut St Paulin type cheese (food code: 12-492) because this is a semi-soft cheese made with cow's milk and had similar fat subtotals to Brie with outer rind removed, and no other soft cheeses made with cow's milk in MCW had individual FA values.                       |
| 11-822    | Crispbread, rye                       | Palmitic acid (16:0) was reported as 15.27g/100g food; however, total SFAs were reported as only 0.16g/100g food.                                                                                                                                                                                                                                                                       | Referred to original data from the 'DH, Nutrient analysis of biscuits, buns, cakes and pastries, 2011', which reported palmitic acid (16:0) was 0.15 g/100g food. This value was re-entered for palmitic acid (16:0) in the individual FA dataset.                                              |
| 17-704    | Salad cream, reduced fat              | Total PUFAs were reported as 5.63 g/100g food; however, the sum of individual PUFAs was 9.14 g/100g food (1.62 times higher).                                                                                                                                                                                                                                                           | Replaced with a recipe for low-fat salad cream based on supermarket products using the following ingredient foods and fractions: 9% rapeseed oil (food code: 17-041); 22% vinegar (17-339); 48% water (17-377); 16% white sugar (17-063); and 5% chicken egg yolk (12-939).                     |
| 16-357    | Salmon, farmed, flesh only, grilled   | Total MUFAs were reported as 6.18 g/100g food; however, the sum of individual MUFAs was 43.58 g/100g food (7.05 times higher).                                                                                                                                                                                                                                                          | Replaced with steamed farm salmon with flesh only (food code: 16-358) because this was a similar food had similar fat subtotals.                                                                                                                                                                |
| 11-993    | Scones, fruit, retail                 | Total PUFAs were reported as 0.80 g/100g food; however, the sum of individual PUFAs was 1.65 g/100g food (2.1 times higher).                                                                                                                                                                                                                                                            | Replaced with plain retail scones (food code: 11-827) because this was a similar food and had similar fat subtotals.                                                                                                                                                                            |
| 16-361    | Sushi, salmon nigiri                  | Total SFAs were reported as 0.48 g/100g food; however, the sum of individual SFAs was 1.09 g/100g food (2.27 times higher). Total MUFAs were reported as 1.00 g/100g food; however, the sum of individual MUFAs was 2.23 g/100g food (2.23 times higher). Total PUFAs were reported as 0.68 g/100g food; however, the sum of individual PUFAs was 1.22 g/100g food (1.79 times higher). | Replaced with a recipe for salmon nigiri sushi based on online recipes using the following ingredient foods and fractions: 70% boiled brown rice (food code: 11-869); and 30% raw wild salmon with flesh only (16-360).                                                                         |
| 11-925    | Tortilla, wheat, soft                 | Total MUFAs were reported as 2.00 g/100g food; however, the sum of individual MUFAs was 4.03 g/100g food (2.02 times higher). Total PUFAs were reported as 0.80 g/100g food; however, the sum of individual PUFAs was 2.19 g/100g food (2.74 times higher).                                                                                                                             | Replaced with white English style muffins (food code: 11-541) because this better matched how the Oxford WebQ question was asked and there were no similar foods that had individual FA values in MCW.                                                                                          |
| 12-184    | Yogurt, whole milk, plain             | Individual SFA values were reported as negative values per 100g food, which is not possible (e.g. butyric acid [4:0] was reported as -0.11g/100g food).                                                                                                                                                                                                                                 | The sum of all individual SFAs if the values were assumed to be positive rather than negative was 1.92g/100g food, which is almost exactly the reported value for total SFAs (1.91g/100g food). Negative individual SFA values were re-entered as positive values in the individual FA dataset. |

DH, department of health; FA, fatty acid; MCW, McCance and Widdowson; MUFA, monounsaturated fatty acid; PUFA, polyunsaturated fatty acid; SFA, saturated fatty acid; USDA, US Department of Agriculture.

**Table S3.** Description of USDA food codes (n=31) included in the individual FA dataset (MCW + USDA).

| Food code | Food code description                                        | Reason for using USDA food code                                                                                                                                                                                                                     | Included in the following food groups <sup>1</sup>                                      |
|-----------|--------------------------------------------------------------|-----------------------------------------------------------------------------------------------------------------------------------------------------------------------------------------------------------------------------------------------------|-----------------------------------------------------------------------------------------|
| 63105010  | Avocado, raw                                                 | Guacamole, homemade (17-797) missing individual FAs. No similar food codes available in MCW. Assigned 85% to USDA food code in recipe replacement.                                                                                                  | Vegetables and vegetable dishes (vegetable dips, vegetable dishes and meat substitutes) |
|           |                                                              | Avocado, average, flesh only (14-037) missing individual FAs. No similar food codes available in MCW. Replacement USDA food code has similar description and fat total and subtotals.                                                               | Vegetables and vegetable dishes (vegetables including legumes/pulses)                   |
| 42104200  | Cashew nuts, dry roasted                                     | Cashew nuts, kernel only, roasted and salted (14-812) missing individual FAs. No similar food codes available in MCW. Replacement USDA food code has similar description and fat total and subtotals.                                               | Nuts and seeds                                                                          |
|           |                                                              | Nut roast, homemade (15-643) missing individual FAs. No similar food codes available in MCW. Assigned 15% to USDA food code in recipe replacement.                                                                                                  | Vegetables and vegetable dishes (vegetable dips, vegetable dishes and meat substitutes) |
| 75214010  | Cauliflower, cooked, NS as to form, fat not added in cooking | Cauliflower, boiled in unsalted water (13-513) missing individual FAs. No similar food codes available in MCW. Replacement USDA food code has similar description and fat total and subtotals.                                                      | Vegetables and vegetable dishes (vegetables including legumes/pulses)                   |
|           |                                                              | Cheese, processed, slices, reduced fat (12-549) missing individual FAs. No similar food codes available in MCW. Replacement USDA food code has similar description and average of fat and fat subtotals for all cheese spreads being replaced.      | Milk and milk products (cheese)                                                         |
| 14410330  | Cheese spread, American or Cheddar cheese base, reduced fat  | Cheese, spreadable, medium fat, soft, white (12-538) missing individual FAs. No similar food codes available in MCW. Replacement USDA food code has similar description and average of fat and fat subtotals for all cheese spreads being replaced. | Milk and milk products (cheese)                                                         |
|           |                                                              | Cheese, spreadable, soft white, low fat (12-541) missing individual FAs. No similar food codes available in MCW. Replacement USDA food code has similar description and average of fat and fat subtotals for all cheese spreads being replaced.     | Milk and milk products (cheese)                                                         |
| 14410120  | Cheese, American, reduced fat                                | Cheese, Cheddar type, half fat (12-348) missing individual FAs. No similar food codes available in MCW. Replacement USDA food code has similar description and fat total and subtotals.                                                             | Milk and milk products (cheese)                                                         |
| 14201010  | Cheese, cottage, creamed, large or small curd                | Cheese, cottage, plain (12-539) missing individual FAs. No similar food codes available in MCW. Replacement USDA food code has similar description and fat total and subtotals.                                                                     | Milk and milk products (cheese)                                                         |
| 14204010  | Cheese, cottage, low fat (1-2% fat)                          | Cheese, cottage, plain, reduced fat (12-550) missing individual FAs. No similar food codes available in MCW. Replacement USDA food code has similar description and fat total and subtotals.                                                        | Milk and milk products (cheese)                                                         |
|           |                                                              | Pakora, vegetable, takeaway and restaurant (15-620) missing individual FAs. No similar food codes available in MCW. Assigned 40% to USDA food code in recipe replacement.                                                                           | Miscellaneous (samosa, pakora)                                                          |
|           |                                                              | Beanburger, soya, fried in rapeseed oil (15-668) missing individual FAs. No similar food codes available in MCW. Assigned 47.5% to USDA food code in recipe replacement.                                                                            | Vegetables and vegetable dishes (vegetable dips, vegetable dishes and meat substitutes) |
| 41302120  | Chickpeas, canned, low sodium, fat not added in cooking      | Soup, minestrone, homemade (17-810) missing individual FAs. No similar food codes available in MCW. Assigned 10% to USDA food code in recipe replacement.                                                                                           | Miscellaneous (soups)                                                                   |
|           |                                                              | Falafel, fried in rapeseed oil, homemade (15-795) missing individual FAs. No similar food codes available in MCW. Assigned 90% to USDA food code in recipe replacement.                                                                             | Vegetables and vegetable dishes (vegetable dips, vegetable dishes and meat substitutes) |
|           |                                                              | Houmous (13-556) missing individual FAs and fat subtotals. No similar food codes available in MCW. Assigned 58% to USDA food code in recipe replacement.                                                                                            | Vegetables and vegetable dishes (vegetable dips, vegetable dishes and meat substitutes) |

|          |                                                       |                                                                                                                                                                                                                                                            |                                                                                         |
|----------|-------------------------------------------------------|------------------------------------------------------------------------------------------------------------------------------------------------------------------------------------------------------------------------------------------------------------|-----------------------------------------------------------------------------------------|
|          |                                                       | Beans, chickpeas, canned, re-heated, drained (13-560) missing individual FAs. No similar food codes available in MCW. Replacement USDA food code has similar description and fat total and subtotals.                                                      | Vegetables and vegetable dishes (vegetables including legumes/pulses)                   |
|          |                                                       | Beans, red kidney, canned in water, re-heated, drained (13-561) missing individual FAs. No similar food codes available in MCW. Replacement USDA food code has similar description and fat total and subtotals.                                            | Vegetables and vegetable dishes (vegetables including legumes/pulses)                   |
| 91705400 | Chocolate, white                                      | Chocolate, white (17-091) missing individual FAs. No similar food codes available in MCW. Replacement USDA food code has similar description and fat total and subtotals.                                                                                  | Sugars, preserves and sweets spreads (chocolate confectionery)                          |
| 12210400 | Cream substitute, powdered                            | Coffee mate, coffee whitener (12-546) missing individual FAs. No similar food codes available in MCW. Replacement USDA food code has similar description and fat total and subtotals.                                                                      | Milk and milk products (semi skimmed milk)                                              |
| 41102220 | Fava beans, cooked, fat not added in cooking          | Beans, broad, whole, boiled in unsalted water (13-648) missing individual FAs. No similar food codes available in MCW. Replacement USDA food code has similar description and fat total and subtotals.                                                     | Vegetables and vegetable dishes (vegetables including legumes/pulses)                   |
| 75111500 | Garlic, raw                                           | Garlic, raw (13-244) missing individual FAs. No similar food codes available in MCW. Replacement USDA food code has similar description and fat total and subtotals.                                                                                       | Vegetables and vegetable dishes (vegetables including legumes/pulses)                   |
|          |                                                       | Houmous (13-556) missing individual FAs and fat subtotals. No similar food codes available in MCW. Assigned 1% to USDA food code in recipe replacement.                                                                                                    | Vegetables and vegetable dishes (vegetable dips, vegetable dishes and meat substitutes) |
| 81204000 | Ghee, clarified butter                                | Ghee, butter (17-640) missing individual FAs. No similar food codes available in MCW. Replacement USDA food code has similar description and fat total and subtotals.                                                                                      | Fat spreads (dairy fat spread)                                                          |
| 28501010 | Gravy, beef or meat, fat free                         | Gravy instant granules, made up with water (17-725) missing individual FAs. No similar food codes available in MCW. Assigned 95% to USDA food code in recipe replacement.                                                                                  | Miscellaneous (savoury sauces)                                                          |
| 72119210 | Kale, cooked, NS as to form, fat not added in cooking | Curly kale, boiled in unsalted water (13-649) missing individual FAs. No similar food codes available in MCW. Replacement USDA food code has similar description and fat total and subtotals.                                                              | Vegetables and vegetable dishes (vegetables including legumes/pulses)                   |
|          |                                                       | Beanburger, soya, fried in rapeseed oil (15-668) missing individual FAs. No similar food codes available in MCW. Assigned 47.5% to USDA food code in recipe replacement.                                                                                   | Vegetables and vegetable dishes (vegetable dips, vegetable dishes and meat substitutes) |
| 41305000 | Lentils, dry, cooked, fat not added in cooking        | Nut roast, homemade (15-643) missing individual FAs. No similar food codes available in MCW. Assigned 30% to USDA food code in recipe replacement.                                                                                                         | Vegetables and vegetable dishes (vegetable dips, vegetable dishes and meat substitutes) |
|          |                                                       | Lentils, red, split, dried, boiled in unsalted water (13-434) missing individual FAs. No similar food codes available in MCW. Replacement USDA food code has similar description and fat total and subtotals.                                              | Vegetables and vegetable dishes (vegetables including legumes/pulses)                   |
| 93301450 | Liqueur with cream                                    | Liqueurs, cream (17-768) missing individual FAs. No similar food codes available in MCW. Replacement USDA food code has similar description and fat total and subtotals.                                                                                   | Alcoholic beverages (spirits)                                                           |
| 63129010 | Mango, raw                                            | Mangoes, ripe, flesh only, raw (14-378) missing individual FAs. No similar food codes available in MCW. Replacement USDA food code has similar description and fat total and subtotals.                                                                    | Fruit                                                                                   |
|          |                                                       | Tartare sauce (17-722) missing individual FAs. No similar food codes available in MCW. Replacement USDA food code has similar description and fat total and subtotals.                                                                                     | Miscellaneous (savoury sauces)                                                          |
| 83204000 | Mayonnaise, light                                     | Mayonnaise, reduced fat (17-679) missing individual FAs. No similar food codes available in MCW. Replacement USDA food code has similar description and fat total and subtotals.                                                                           | Miscellaneous (savoury sauces)                                                          |
| 11350000 | Milk, almond, ready-to-drink                          | Added to all food items containing *milk_riceoatveg and *milk_other to better match how the question was asked in the Oxford WebQ. Food code for almond milk not available in MCW. Food codes for oat milk and rice milk are not available in MCW or USDA. | Milk and milk products (semi skimmed milk)                                              |

|          |                                                                   |                                                                                                                                                                                                                                                                                                                                                                                                                                                                                                                                                              |                                                                                                        |
|----------|-------------------------------------------------------------------|--------------------------------------------------------------------------------------------------------------------------------------------------------------------------------------------------------------------------------------------------------------------------------------------------------------------------------------------------------------------------------------------------------------------------------------------------------------------------------------------------------------------------------------------------------------|--------------------------------------------------------------------------------------------------------|
| 11114330 | Milk, cow's, fluid, lactose reduced, 2% fat                       | Added to all food items containing *milk_other to better match how the question was asked in the Oxford WebQ. Food codes for lactose reduced or lactose free milks not available in MCW.                                                                                                                                                                                                                                                                                                                                                                     | Milk and milk products (other milk and cream; semi skimmed milk)                                       |
| 11810000 | Milk, dry, not reconstituted, NS as to whole, low fat, or non-fat | Dried skimmed milk (12-521) missing individual FAs. No similar food codes available in MCW. Replacement USDA food code has similar description and fat total and subtotals.                                                                                                                                                                                                                                                                                                                                                                                  | Milk and milk products (semi skimmed milk); cereals and cereal products (high fibre breakfast cereals) |
| 11830260 | Milk, malted, dry mix, fortified, not reconstituted, chocolate    | Drinking chocolate, powder, reduced fat (17-499) missing individual FAs. No similar food codes available in MCW. Replacement USDA food code has similar description and fat total and subtotals. Horlicks, powder (17-731) missing individual FAs. No similar food codes available in MCW. Replacement USDA food code has similar description and fat total and subtotals. Ovaltine, powder (17-734) missing individual FAs. No similar food codes available in MCW. Replacement USDA food code has similar description and fat total and subtotals.         | Milk and milk products (other milk and cream)                                                          |
| 75510000 | Olives, NFS                                                       | Olives, green, in brine, drained, flesh and skin (14-340) missing individual FAs. No similar food codes available in MCW. Replacement USDA food code has similar description and fat total and subtotals.                                                                                                                                                                                                                                                                                                                                                    | Milk and milk products (other milk and cream)                                                          |
| 63133010 | Papaya, raw                                                       | Papaya, flesh only, raw (14-390) missing individual FAs. No similar food codes available in MCW. Replacement USDA food code has similar description and fat total and subtotals.                                                                                                                                                                                                                                                                                                                                                                             | Milk and milk products (other milk and cream)                                                          |
| 75222010 | Parsnips, cooked, fat not added in cooking                        | Parsnip, boiled in unsalted water (13-631) missing individual FAs. No similar food codes available in MCW. Replacement USDA food code has similar description and fat total and subtotals.                                                                                                                                                                                                                                                                                                                                                                   | Milk and milk products (other milk and cream)                                                          |
| 42114130 | Pistachio nuts                                                    | Pistachio nuts, kernel only, roasted and salted (14-840) missing individual FAs. No similar food codes available in MCW. Replacement USDA food code has similar description and fat total and subtotals.                                                                                                                                                                                                                                                                                                                                                     | Milk and milk products (other milk and cream)                                                          |
| 41420010 | Soybean curd                                                      | Sushi, vegetable (15-617) missing individual FAs. No similar food codes available in MCW. Assigned 14% to USDA food code in recipe replacement. Tofu, soya bean, steamed (13-570) missing individual FAs. No similar food codes available in MCW. Replacement USDA food code has similar description and fat total and subtotals. Tofu, soya bean, steamed, fried (13-571) missing individual FAs. Assigned 87.5% to USDA food code in recipe replacement.                                                                                                   | Miscellaneous (savory sauces)                                                                          |
| 72125212 | Spinach, cooked, from frozen, fat not added in cooking            | Spinach, mature, boiled in unsalted water (13-573) missing individual FAs. No similar food codes available in MCW. Replacement USDA food code has similar description and fat total and subtotals. Spinach, mature, raw (13-572) missing individual FAs. No similar food codes available in MCW. Replacement USDA food code has similar description and fat total and subtotals. Spinach, baby, raw (13-521) missing individual FAs. No similar food codes available in MCW. Replacement USDA food code has similar description and fat total and subtotals. | Fruit                                                                                                  |
| 72125100 | Spinach, raw                                                      | Watercress, raw (13-669) missing individual FAs. No similar food codes available in MCW. Replacement USDA food code has similar description and fat total and subtotals.                                                                                                                                                                                                                                                                                                                                                                                     | Vegetables and vegetable dishes (vegetables including legumes/pulses)                                  |
| 71201015 | White potato chips, regular cut                                   | Potato crisps, fried in sunflower oil (17-671) missing individual FAs. No similar food codes available in MCW. USDA code has similar description.                                                                                                                                                                                                                                                                                                                                                                                                            | Nuts and seeds                                                                                         |
|          |                                                                   |                                                                                                                                                                                                                                                                                                                                                                                                                                                                                                                                                              | Vegetables and vegetable dishes (vegetable dips, vegetable dishes and meat substitutes)                |
|          |                                                                   |                                                                                                                                                                                                                                                                                                                                                                                                                                                                                                                                                              | Vegetables and vegetable dishes (vegetable dips, vegetable dishes and meat substitutes)                |
|          |                                                                   |                                                                                                                                                                                                                                                                                                                                                                                                                                                                                                                                                              | Vegetables and vegetable dishes (vegetable dips, vegetable dishes and meat substitutes)                |
|          |                                                                   |                                                                                                                                                                                                                                                                                                                                                                                                                                                                                                                                                              | Vegetables and vegetable dishes (vegetables including legumes/pulses)                                  |
|          |                                                                   |                                                                                                                                                                                                                                                                                                                                                                                                                                                                                                                                                              | Vegetables and vegetable dishes (vegetables including legumes/pulses)                                  |
|          |                                                                   |                                                                                                                                                                                                                                                                                                                                                                                                                                                                                                                                                              | Vegetables and vegetable dishes (vegetables including legumes/pulses)                                  |
|          |                                                                   |                                                                                                                                                                                                                                                                                                                                                                                                                                                                                                                                                              | Savory snacks (crisps and savory snacks)                                                               |

FA, fatty acid; MCW, McCance and Widdowson; NFS, not further specified; NS, not specified; USDA, US Department of Agriculture. <sup>1</sup> Food groups defined in Supplementary Table 5.

**Table S4.** Description of the individual FAs included in the new individual FA dataset (MCW + USDA).

| Individual FAs    | Systematic name             | Common name                | Values obtained from MCW <sup>1</sup> | Values obtained from USDA <sup>2</sup> |
|-------------------|-----------------------------|----------------------------|---------------------------------------|----------------------------------------|
| SFAs              |                             |                            |                                       |                                        |
| 4:0               | butanoic acid               | butyric acid               | 4:0                                   | 4:0                                    |
| 6:0               | hexanoic acid               | caproic acid               | 6:0                                   | 6:0                                    |
| 8:0               | octanoic acid               | caprylic acid              | 8:0                                   | 8:0                                    |
| 10:0              | decanoic acid               | capric acid                | 10:0                                  | 10:0                                   |
| 12:0              | dodecanoic acid             | lauric acid                | 12:0                                  | 12:0                                   |
| 14:0              | tetradecanoic acid          | myristic acid              | 14:0                                  | 14:0                                   |
| 15:0              | pentadecanoic acid          | [systematic name used]     | 15:0                                  | 15:0                                   |
| 16:0              | hexadecanoic acid           | palmitic acid              | 16:0                                  | 16:0                                   |
| 17:0              | heptadecanoic acid          | [systematic name used]     | 17:0                                  | 17:0                                   |
| 18:0              | octadecanoic acid           | stearic acid               | 18:0                                  | 18:0                                   |
| MUFAs             |                             |                            |                                       |                                        |
| 16:1              | hexadecenoic acid           | palmitoleic acid           | 16:1 or 16:1c                         | 16:0                                   |
| 18:1              | octadecenoic acid           | oleic acid                 | 18:1 or 18:1c                         | 18:0                                   |
| 20:1              | eicosenoic acid             | [systematic name used]     | 20:1 or 20:1c                         | 20:1                                   |
| 22:1              | docosenoic acid             | [systematic name used]     | 22:1 or 22:1c                         | 22:1                                   |
| PUFAs             |                             |                            |                                       |                                        |
| n-3 PUFAs         |                             |                            |                                       |                                        |
| 18:3 <sup>3</sup> | octadecatrienoic acid       | alpha-linolenic acid (ALA) | 18:3 or 18:3-cis (n-3)                | 18:3                                   |
| 18:4 <sup>3</sup> | octadecatetraenoic acid     | stearidonic acid           | 18:4 or 18:4-cis (n-3)                | 18:4                                   |
| 20:5 <sup>3</sup> | eicosapentaenoic acid (EPA) | [systematic name used]     | 20:5 or 20:5-cis (n-3)                | 20:5-cis (n-3)                         |
| 22:5 <sup>3</sup> | docosapentaenoic acid (DPA) | [systematic name used]     | 22:5 or 22:5-cis (n-3)                | 22:5-cis (n-3)                         |
| 22:6 <sup>3</sup> | docosahexaenoic acid (DHA)  | [systematic name used]     | 22:6 or 22:6-cis (n-3)                | 22:6-cis (n-3)                         |
| n-6 PUFAs         |                             |                            |                                       |                                        |
| 18:2 <sup>4</sup> | octadecadienoic acid        | linoleic acid (LA)         | 18:2 or 18:2-cis (n-6)                | 18:2                                   |
| 20:4 <sup>4</sup> | eicosatetraenoic acid       | arachidonic acid           | 20:4 or 20:4-cis (n-6)                | 20:4                                   |

FA, fatty acid; FNDDS, Food and Nutrient Database for Dietary Studies; MCW, McCance and Widdowson; MUFA, monounsaturated fatty acid; NNDsr, National Nutrient Database for Standard Reference; PUFA, polyunsaturated fatty acid; SFA, saturated fatty acid; USDA, US Department of Agriculture. <sup>1</sup> FAs obtained from McCance and Widdowson The Composition of Foods Integrated Dataset (2021). For individual MUFAs and PUFAs the FAs obtained are listed in order of preference (i.e. if the undifferentiated FA was missing then the isomer specific FA was selected). <sup>2</sup> FAs obtained from the USDA NNDsr Release 26 (2013). FAs from Release 26 correspond to the FAs included in the FNDDS (2011-2012) except for pentadecanoic acid (15:0) and heptadecanoic acid (17:0) because these FAs had incomplete values for some foods in the USDA NNDsr Release 26. <sup>3</sup> FA included in the calculation for n-3 PUFAs because the most typical FA isomer was cis (n-3). <sup>4</sup> FA included in the calculation for n-6 PUFAs because the most typical isomer was cis (n-6).

**Table S5.** Description of food groups used to examine dietary sources of individual FA intakes.

| Main food groups <sup>1</sup>                         | Includes the following subsidiary food groups <sup>2</sup>                                                                                                   |
|-------------------------------------------------------|--------------------------------------------------------------------------------------------------------------------------------------------------------------|
| <b>Cereals and cereal products</b>                    |                                                                                                                                                              |
| Pasta and rice                                        | White pasta and rice; wholemeal pasta, brown rice and other wholegrains                                                                                      |
| Pizza and other miscellaneous grains                  | Pizza; grain dishes (added fat)                                                                                                                              |
| White bread                                           | White bread                                                                                                                                                  |
| Wholemeal bread                                       | Wholemeal bread                                                                                                                                              |
| Other bread                                           | Mixed bread, brown and seeded; other bread                                                                                                                   |
| High fibre breakfast cereals                          | Bran cereal; biscuit cereal; oat cereal (non-sugar); oat cereal (sugar); muesli                                                                              |
| Other breakfast cereals                               | Other cereal (sugar)                                                                                                                                         |
| Biscuits                                              | Biscuits                                                                                                                                                     |
| Savoury crackers                                      | Savoury crackers                                                                                                                                             |
| Desserts, cakes and pastries                          | Desserts, cakes and pastries                                                                                                                                 |
| <b>Milk and milk products</b>                         |                                                                                                                                                              |
| Whole milk                                            | Whole milk                                                                                                                                                   |
| Semi skimmed milk                                     | Semi-skimmed milk                                                                                                                                            |
| Skimmed milk                                          | Skimmed milk                                                                                                                                                 |
| Other milk and cream                                  | Rice/oat drink; soy drink; milk-based and powdered drinks; cream                                                                                             |
| Cheese                                                | High fat cheese; medium and low fat cheese                                                                                                                   |
| Yoghurt                                               | Full fat yogurt; low fat yogurt                                                                                                                              |
| Dairy desserts                                        | Dairy desserts                                                                                                                                               |
| Soya-based desserts and yogurt                        | Soya-based desserts and yogurt                                                                                                                               |
| <b>Eggs and egg dishes</b>                            |                                                                                                                                                              |
| Eggs and egg dishes                                   | Eggs and egg dishes                                                                                                                                          |
| <b>Fat spreads<sup>3</sup></b>                        |                                                                                                                                                              |
| Olive oil                                             | Olive oil (drizzling/dunking)                                                                                                                                |
| Dairy fat spread                                      | Dairy fat spread lower fat; dairy fat spread                                                                                                                 |
| Vegetable spread                                      | Vegetable-spread lower fat; vegetable spread                                                                                                                 |
| <b>Meat and meat products</b>                         |                                                                                                                                                              |
| Poultry                                               | Poultry                                                                                                                                                      |
| Pork                                                  | Pork                                                                                                                                                         |
| Beef                                                  | Beef                                                                                                                                                         |
| Lamb                                                  | Lamb                                                                                                                                                         |
| Other meat                                            | Other meat                                                                                                                                                   |
| Processed meat                                        | Processed meat                                                                                                                                               |
| Breaded/battered chicken                              | Breaded/battered chicken                                                                                                                                     |
| <b>Fish and fish dishes</b>                           |                                                                                                                                                              |
| Breaded/battered fish                                 | Breaded/battered fish                                                                                                                                        |
| Other white fish, tinned tuna and shellfish           | Other white fish and tinned tuna; shellfish                                                                                                                  |
| Oily fish                                             | Oily fish                                                                                                                                                    |
| <b>Vegetables and vegetable dishes</b>                |                                                                                                                                                              |
| Vegetables including legumes/pulses                   | Raw salad; green leafy/cabbages; root vegetables; tomatoes; allium vegetables; other vegetables (mushrooms, fruiting, mixed); peas/sweetcorn; legumes/pulses |
| Vegetable dips, vegetable dishes and meat substitutes | Vegetarian meals; soy-based meals; vegetable side dishes; vegetable dips                                                                                     |
| Fried/roast potatoes                                  | Fried/roast potatoes                                                                                                                                         |
| Baked/boiled/mashed potatoes                          | Potatoes/sweet potatoes (baked/boiled); mashed potatoes                                                                                                      |
| <b>Savoury snacks</b>                                 |                                                                                                                                                              |
| Crisps and savoury snacks                             | Savoury snacks                                                                                                                                               |
| <b>Nuts and seeds</b>                                 |                                                                                                                                                              |
| Nuts and seeds                                        | Salted nuts and seeds; unsalted nuts and seeds; nut-based spreads                                                                                            |
| <b>Fruit</b>                                          |                                                                                                                                                              |
| Fruit                                                 | Citrus; berries; apples and pears; bananas and other fruit; dried fruit; stewed fruit                                                                        |
| <b>Sugars, preserves and sweet spreads</b>            |                                                                                                                                                              |
| Sugars, preserves and sweet spreads                   | Added sugars and preserves                                                                                                                                   |

|                         |                                                                                            |
|-------------------------|--------------------------------------------------------------------------------------------|
| Sugar confectionery     | Other sweets                                                                               |
| Chocolate confectionery | Chocolate confectionery                                                                    |
| Non-alcoholic beverages |                                                                                            |
| Fruit juice             | Fruit juice                                                                                |
| Soft drinks, not diet   | SSBs and other sugary drinks                                                               |
| Soft drinks, diet       | Low/non-sugar SSBs                                                                         |
| Tea, coffee and water   | Coffee, caffeinated; coffee, decaffeinated; tea; tea, decaffeinated; water/sparkling water |
| Alcoholic beverages     |                                                                                            |
| Spirits and liqueurs    | Spirits                                                                                    |
| Wine                    | White wine; red wine; fortified wine                                                       |
| Beer and cider          | Beer and cider                                                                             |
| Miscellaneous           |                                                                                            |
| Soups                   | Soups                                                                                      |
| Savoury sauces          | Sauces (higher fat); sauces (lower fat)                                                    |
| Samosa, pakora          | Samosa, pakora                                                                             |
| Sushi                   | Sushi                                                                                      |

FA, fatty acid; NDNS, National Diet and Nutrition Survey; SSB, sugar-sweetened beverage. <sup>1</sup> Main food groups (14 primary food groups and 53 secondary food groups) were aggregated from subsidiary food groups to approximate the food groups in the NDNS years 1-4 combined (2011-2012), which were used to examine the dietary sources of individual FAs in this study. <sup>2</sup> Subsidiary food groups (n=93) that were included in the each of the main food groups. <sup>3</sup> Some oils which are used as a condiment on bread or salads are included in this food group; however, this food group does not include oils or fats used in cooking.

**Table S6.** Characteristics of 207,997 UK Biobank participants included in this study.

| Characteristics                     | Total<br>n = 207,997 | Women<br>n = 114,406 | Men<br>n = 93,591 |
|-------------------------------------|----------------------|----------------------|-------------------|
| Age at recruitment (years)          | 56.1 (7.9)           | 55.7 (7.8)           | 56.6 (8.0)        |
| White ethnicity, n (%)              | 198,700 (95.9%)      | 109,260 (95.6%)      | 89,440 (95.6%)    |
| College or university degree, n (%) | 145,025 (76.6%)      | 76,340 (73.2%)       | 68,685 (80.8%)    |
| Alcohol (g/d) <sup>1</sup>          | 16.3 (17.2)          | 10.9 (10.6)          | 22.5 (20.9)       |
| Current smoker, n (%)               | 16,147 (7.8%)        | 7,560 (6.6%)         | 8,587 (8.1%)      |
| High physical activity, n (%)       | 30,460 (15.0%)       | 15,320 (13.7%)       | 15,157 (16.5%)    |
| BMI (kg/m <sup>2</sup> )            | 26.9 (4.6)           | 26.5 (5.0)           | 27.4 (4.1)        |

BMI, body mass index; g/d, grams per day; kg/m<sup>2</sup>, kilogram per square metre; SD, standard deviation. Numbers are means (SD) unless otherwise specified as numbers (%), with % representing the column percentage excluding participants with missing values. <sup>1</sup> Excluding non-drinkers.



**Table S7.** Percentage contribution of food groups to intake of individual SFAs in the individual FA dataset (MCW + USDA) in 207,997 UK Biobank participants.

| Food groups <sup>1</sup>             | Total SFAs | Percentage contribution of food groups to daily intake of |       |       |       |       |       |       |       |       |       |
|--------------------------------------|------------|-----------------------------------------------------------|-------|-------|-------|-------|-------|-------|-------|-------|-------|
|                                      |            | 4:0                                                       | 6:0   | 8:0   | 10:0  | 12:0  | 14:0  | 15:0  | 16:0  | 17:0  | 18:0  |
| Cereals and cereal products          | 23.72      | 16.71                                                     | 16.34 | 22.18 | 20.82 | 29.62 | 18.79 | 18.28 | 27.72 | 16.88 | 18.25 |
| Of which:                            |            |                                                           |       |       |       |       |       |       |       |       |       |
| Pizza and other miscellaneous grains | 5.08       | 5.40                                                      | 5.06  | 4.32  | 4.84  | 3.10  | 4.75  | 5.52  | 6.57  | 4.34  | 3.18  |
| Other bread                          | 0.57       | 0.32                                                      | 0.46  | 1.12  | 0.69  | 1.45  | 0.57  | 0.57  | 0.56  | 0.52  | 0.39  |
| High fibre breakfast cereals         | 1.51       | 1.21                                                      | 1.32  | 2.95  | 2.17  | 4.16  | 1.71  | 0.93  | 1.53  | 1.48  | 0.89  |
| Biscuits                             | 5.80       | 3.74                                                      | 3.34  | 3.50  | 3.27  | 4.79  | 3.81  | 4.81  | 6.86  | 4.65  | 5.72  |
| Savoury crackers                     | 0.83       | 0.00                                                      | 0.12  | 1.59  | 0.63  | 2.44  | 0.54  | 0.09  | 1.05  | 0.12  | 0.33  |
| Desserts, cakes and pastries         | 7.76       | 6.04                                                      | 6.03  | 7.43  | 8.66  | 11.43 | 6.82  | 6.37  | 8.74  | 5.74  | 6.03  |
| Milk and milk products               | 27.74      | 54.19                                                     | 55.72 | 48.40 | 50.82 | 41.50 | 43.78 | 40.41 | 22.11 | 22.59 | 23.88 |
| Of which:                            |            |                                                           |       |       |       |       |       |       |       |       |       |
| Whole milk                           | 1.21       | 2.52                                                      | 2.61  | 2.18  | 2.72  | 1.59  | 2.11  | 2.03  | 0.97  | 0.97  | 0.98  |
| Semi skimmed milk                    | 5.80       | 12.49                                                     | 13.35 | 8.31  | 11.85 | 8.08  | 10.38 | 10.15 | 4.76  | 4.95  | 4.83  |
| Other milk and cream                 | 1.70       | 3.39                                                      | 3.28  | 2.48  | 2.94  | 1.97  | 2.61  | 2.27  | 1.43  | 1.16  | 1.57  |
| Cheese                               | 11.65      | 26.67                                                     | 28.48 | 21.82 | 22.07 | 11.50 | 18.76 | 18.21 | 9.08  | 10.49 | 9.22  |
| Yoghurt                              | 1.77       | 3.66                                                      | 3.33  | 2.18  | 2.82  | 1.89  | 2.95  | 2.53  | 1.51  | 1.02  | 1.35  |
| Dairy desserts                       | 5.27       | 4.78                                                      | 4.66  | 11.08 | 7.46  | 15.41 | 6.45  | 5.23  | 4.06  | 3.98  | 5.61  |
| Eggs and egg dishes                  | 3.14       | 1.67                                                      | 1.59  | 1.14  | 1.39  | 0.81  | 1.50  | 1.95  | 3.83  | 7.01  | 3.51  |
| Fat spreads                          | 11.00      | 17.89                                                     | 17.16 | 14.88 | 16.56 | 15.05 | 14.79 | 15.27 | 10.31 | 11.15 | 8.42  |
| Of which:                            |            |                                                           |       |       |       |       |       |       |       |       |       |
| Dairy fat spread                     | 8.66       | 17.89                                                     | 17.10 | 13.09 | 15.72 | 10.41 | 13.78 | 15.02 | 7.37  | 10.52 | 6.71  |
| Vegetable spread                     | 2.19       | <0.01                                                     | 0.06  | 1.79  | 0.84  | 4.61  | 1.00  | 0.25  | 2.72  | 0.53  | 1.54  |
| Meat and meat products               | 13.46      | 0.03                                                      | 0.03  | 0.13  | 0.81  | 1.09  | 7.12  | 13.11 | 14.62 | 26.90 | 21.34 |
| Of which:                            |            |                                                           |       |       |       |       |       |       |       |       |       |
| Poultry                              | 1.25       | <0.01                                                     | <0.01 | <0.01 | <0.01 | 0.04  | 0.26  | 0.10  | 1.58  | 0.75  | 1.45  |
| Pork                                 | 0.90       | <0.01                                                     | <0.01 | <0.01 | 0.08  | 0.04  | 0.31  | 0.04  | 1.03  | 0.82  | 1.45  |
| Beef                                 | 3.83       | <0.01                                                     | <0.01 | <0.01 | 0.06  | 0.07  | 2.29  | 8.36  | 3.80  | 14.02 | 6.55  |
| Lamb                                 | 1.94       | <0.01                                                     | <0.01 | <0.01 | 0.33  | 0.59  | 2.17  | 3.77  | 1.60  | 6.12  | 3.52  |
| Other meat                           | 0.56       | <0.01                                                     | <0.01 | <0.01 | <0.01 | <0.01 | 0.17  | <0.01 | 0.78  | 0.41  | 0.61  |
| Processed meat                       | 4.57       | 0.03                                                      | 0.03  | 0.02  | 0.34  | 0.30  | 1.85  | 0.72  | 5.24  | 4.76  | 7.36  |
| Fish and fish dishes                 | 1.82       | <0.01                                                     | <0.01 | 0.18  | 0.01  | 0.11  | 3.65  | 2.78  | 2.08  | 4.28  | 1.16  |
| Of which:                            |            |                                                           |       |       |       |       |       |       |       |       |       |
| Oily fish                            | 1.22       | <0.01                                                     | <0.01 | <0.01 | <0.01 | 0.03  | 3.24  | 2.63  | 1.34  | 3.25  | 0.65  |
| Vegetables and vegetable dishes      | 6.31       | 3.96                                                      | 3.80  | 5.98  | 3.43  | 3.09  | 3.74  | 3.13  | 7.02  | 4.17  | 5.28  |

|                                                       |      |       |       |      |       |      |      |       |      |      |       |
|-------------------------------------------------------|------|-------|-------|------|-------|------|------|-------|------|------|-------|
| Of which:                                             |      |       |       |      |       |      |      |       |      |      |       |
| Vegetable dips, vegetable dishes and meat substitutes | 0.62 | 0.05  | 0.04  | 0.08 | 0.07  | 0.10 | 0.16 | 0.07  | 0.69 | 0.56 | 0.76  |
| Fried/roast potatoes                                  | 2.08 | <0.01 | <0.01 | 2.92 | <0.01 | 0.20 | 0.48 | 0.45  | 2.88 | 1.52 | 1.90  |
| Baked/boiled/mashed potatoes                          | 1.97 | 3.09  | 2.93  | 2.33 | 2.65  | 2.22 | 2.38 | 2.01  | 1.74 | 1.46 | 1.54  |
| Savoury snacks                                        | 1.33 | <0.01 | 0.22  | 0.78 | 0.38  | 0.83 | 0.34 | 0.27  | 1.58 | 0.49 | 1.60  |
| Nuts and seeds                                        | 2.13 | <0.01 | <0.01 | 0.43 | 0.25  | 0.79 | 0.59 | <0.01 | 2.43 | 0.68 | 2.21  |
| Sugars, preserves and sweet spreads                   | 5.42 | 1.50  | 1.61  | 2.60 | 1.99  | 3.93 | 2.11 | 1.90  | 4.88 | 2.28 | 10.71 |
| Of which:                                             |      |       |       |      |       |      |      |       |      |      |       |
| Chocolate confectionery                               | 5.14 | 1.43  | 1.50  | 2.36 | 1.82  | 3.62 | 1.94 | 1.74  | 4.48 | 2.13 | 10.57 |
| Miscellaneous                                         | 3.44 | 3.92  | 3.41  | 3.21 | 3.44  | 3.12 | 3.47 | 2.90  | 3.31 | 3.57 | 3.59  |
| Of which:                                             |      |       |       |      |       |      |      |       |      |      |       |
| Soups                                                 | 1.62 | 3.18  | 2.67  | 2.20 | 2.62  | 2.40 | 2.42 | 2.18  | 1.37 | 1.56 | 1.31  |
| Savoury sauces                                        | 1.72 | 0.75  | 0.74  | 1.01 | 0.81  | 0.70 | 1.01 | 0.67  | 1.85 | 1.93 | 2.17  |

---

4:0, butyric acid; 6:0, caproic acid; 8:0, caprylic acid; 10:0, capric acid; 12:0, lauric acid; 14:0, myristic acid; 15:0, pentadecanoic acid; 16:0, palmitic acid; 17:0, heptadecanoic acid; 18:0, stearic acid; FA, fatty acid; MCW, McCance and Widdowson; SFA, saturated fatty acid; USDA, US Department of Agriculture. <sup>1</sup> Main food groups as described in Table S5. Food groups that contribute <0.5% to intake of total SFAs are excluded from the table. All other food groups are included.

**Table S8.** Percentage contribution of food groups to intake of individual MUFAs in the individual FA dataset (MCW + USDA) in 207,997 UK Biobank participants.

| Food Groups <sup>1</sup>             | Percentage contribution of food groups to daily intake of |       |       |       |       |
|--------------------------------------|-----------------------------------------------------------|-------|-------|-------|-------|
|                                      | Total MUFAs                                               | 16:1  | 18:1  | 20:1  | 22:1  |
| Cereals and cereal products          | 21.33                                                     | 10.20 | 21.95 | 13.83 | 6.08  |
| Of which:                            |                                                           |       |       |       |       |
| Pizza and other miscellaneous grains | 4.31                                                      | 2.47  | 3.79  | 2.64  | 1.13  |
| White bread                          | 0.61                                                      | 0.25  | 0.65  | 0.64  | <0.01 |
| Wholemeal bread                      | 0.55                                                      | 0.31  | 0.58  | 0.50  | <0.01 |
| Other bread                          | 0.66                                                      | 0.37  | 0.70  | 0.65  | 0.09  |
| High fibre breakfast cereals         | 1.75                                                      | 0.48  | 1.85  | 1.24  | 1.36  |
| Biscuits                             | 3.71                                                      | 1.97  | 4.08  | 1.13  | 0.08  |
| Savoury crackers                     | 0.73                                                      | 0.10  | 0.80  | 0.41  | 0.06  |
| Desserts, cakes and pastries         | 7.09                                                      | 3.73  | 7.48  | 5.52  | 2.80  |
| Milk and milk products               | 10.75                                                     | 18.06 | 9.52  | 16.60 | 0.08  |
| Of which:                            |                                                           |       |       |       |       |
| Semi skimmed milk                    | 2.10                                                      | 3.46  | 1.98  | 0.01  | <0.01 |
| Other milk and cream                 | 0.70                                                      | 1.13  | 0.64  | 0.13  | <0.01 |
| Cheese                               | 4.66                                                      | 9.02  | 4.04  | 2.11  | 0.02  |
| Yoghurt                              | 0.66                                                      | 1.19  | 0.54  | 0.23  | <0.01 |
| Dairy desserts                       | 2.01                                                      | 2.12  | 1.75  | 13.62 | <0.01 |
| Eggs and egg dishes                  | 4.18                                                      | 6.43  | 4.30  | 2.14  | 0.87  |
| Fat spreads                          | 9.90                                                      | 7.37  | 10.07 | 7.30  | 4.34  |
| Of which:                            |                                                           |       |       |       |       |
| Olive oil                            | 0.78                                                      | 0.25  | 0.85  | 0.17  | <0.01 |
| Dairy fat spread                     | 5.48                                                      | 6.46  | 5.30  | 4.24  | 2.29  |
| Vegetable spread                     | 3.64                                                      | 0.66  | 3.92  | 2.88  | 2.06  |
| Meat and meat products               | 15.81                                                     | 33.85 | 15.65 | 9.97  | 1.17  |
| Of which:                            |                                                           |       |       |       |       |
| Poultry                              | 2.65                                                      | 4.77  | 2.68  | 1.49  | 0.30  |
| Pork                                 | 1.06                                                      | 2.46  | 1.07  | 0.97  | <0.01 |
| Beef                                 | 3.70                                                      | 10.00 | 3.55  | 0.11  | 0.17  |
| Lamb                                 | 1.53                                                      | 2.59  | 1.42  | 0.71  | 0.00  |
| Other meat                           | 0.88                                                      | 2.06  | 0.88  | 0.70  | 0.38  |
| Processed meat                       | 5.10                                                      | 9.99  | 5.14  | 5.36  | 0.08  |
| Breaded/battered chicken             | 0.89                                                      | 1.97  | 0.90  | 0.64  | 0.24  |
| Fish and fish dishes                 | 3.79                                                      | 10.94 | 2.45  | 30.68 | 78.65 |
| Of which:                            |                                                           |       |       |       |       |

|                                                       |       |      |       |       |       |
|-------------------------------------------------------|-------|------|-------|-------|-------|
| Breaded/battered fish                                 | 1.30  | 0.36 | 1.37  | 1.61  | 1.22  |
| Oily fish                                             | 2.14  | 9.17 | 0.77  | 27.41 | 76.86 |
| Vegetables and vegetable dishes                       | 12.21 | 6.16 | 12.70 | 7.11  | 3.90  |
| Of which:                                             |       |      |       |       |       |
| Vegetables including legumes/pulses                   | 2.91  | 2.91 | 3.08  | 1.10  | 0.33  |
| Vegetable dips, vegetable dishes and meat substitutes | 2.22  | 0.63 | 2.33  | 1.90  | 1.61  |
| Fried/roast potatoes                                  | 3.82  | 0.91 | 4.12  | 2.34  | 1.16  |
| Baked/boiled/mashed potatoes                          | 2.17  | 1.31 | 2.18  | 1.44  | 0.68  |
| Savoury snacks                                        | 5.66  | 0.51 | 6.20  | 1.82  | 0.79  |
| Nuts and seeds                                        | 5.92  | 1.72 | 6.43  | 2.98  | 0.20  |
| Sugars, preserves and sweet spreads                   | 3.40  | 1.05 | 3.60  | 1.11  | 0.17  |
| Of which:                                             |       |      |       |       |       |
| Chocolate confectionery                               | 3.24  | 0.98 | 3.42  | 1.06  | 0.17  |
| Miscellaneous                                         | 6.76  | 3.45 | 7.03  | 6.45  | 3.75  |
| Of which:                                             |       |      |       |       |       |
| Soups                                                 | 1.17  | 1.38 | 1.14  | 0.88  | 0.32  |
| Savoury sauces                                        | 5.43  | 1.95 | 5.74  | 5.20  | 2.79  |

---

16:1, palmitoleic acid; 18:1, oleic acid; 20:1, eicosenoic acid; 22:1 docosenoic acid; FA, fatty acid; MCW, McCance and Widdowson; MUFA, monounsaturated fatty acid; USDA, US Department of Agriculture. <sup>1</sup> Main food groups as described in Table S5. Food groups that contribute <0.5% to intake of total MUFAs are excluded from the table. All other food groups are included

**Table S9.** Percentage contribution of food groups to intake of individual PUFAs in the individual FA dataset (MCW + USDA) in 207,997 UK Biobank participants.

| Food Groups <sup>1</sup>             | Percentage contribution of food groups to daily intake of |       |       |       |       |       |       |       |
|--------------------------------------|-----------------------------------------------------------|-------|-------|-------|-------|-------|-------|-------|
|                                      | Total PUFAs                                               | 18:2  | 18:3  | 18:4  | 20:4  | 20:5  | 22:5  | 22:6  |
| Cereals and cereal products          | 23.50                                                     | 25.33 | 22.36 | 1.32  | 9.95  | 4.08  | 2.55  | 0.36  |
| Of which:                            |                                                           |       |       |       |       |       |       |       |
| Pasta and rice                       | 1.06                                                      | 1.29  | 0.36  | <0.01 | <0.01 | <0.01 | <0.01 | <0.01 |
| Pizza and other miscellaneous grains | 3.48                                                      | 2.92  | 3.33  | <0.01 | 6.96  | <0.01 | <0.01 | <0.01 |
| White bread                          | 1.55                                                      | 1.80  | 1.36  | <0.01 | <0.01 | <0.01 | <0.01 | <0.01 |
| Wholemeal bread                      | 1.65                                                      | 1.91  | 1.58  | <0.01 | <0.01 | <0.01 | <0.01 | <0.01 |
| Other bread                          | 1.29                                                      | 1.31  | 2.12  | <0.01 | 0.06  | 0.26  | 0.11  | <0.01 |
| High fibre breakfast cereals         | 2.71                                                      | 3.22  | 1.28  | <0.01 | 0.42  | 0.00  | <0.01 | <0.01 |
| Biscuits                             | 1.87                                                      | 2.20  | 0.95  | <0.01 | 0.69  | 1.74  | 0.72  | 0.12  |
| Savoury crackers                     | 0.73                                                      | 0.87  | 0.31  | <0.01 | <0.01 | <0.01 | <0.01 | <0.01 |
| Desserts, cakes and pastries         | 6.32                                                      | 6.52  | 9.21  | 1.06  | 1.72  | 0.80  | 0.93  | 0.18  |
| Milk and milk products               | 3.62                                                      | 3.40  | 4.66  | 0.45  | 5.04  | 19.24 | 7.27  | 0.01  |
| Of which:                            |                                                           |       |       |       |       |       |       |       |
| Other milk and cream                 | 0.87                                                      | 0.81  | 0.80  | 0.45  | 0.24  | 0.31  | 0.16  | <0.01 |
| Cheese                               | 1.29                                                      | 1.14  | 2.17  | <0.01 | 4.32  | 18.93 | 6.32  | 0.01  |
| Dairy desserts                       | 0.64                                                      | 0.70  | 0.54  | <0.01 | 0.48  | <0.01 | 0.79  | <0.01 |
| Eggs and egg dishes                  | 4.93                                                      | 5.33  | 2.58  | 4.63  | 25.35 | 0.78  | 12.95 | 6.77  |
| Fat spreads                          | 9.95                                                      | 10.23 | 13.28 | 1.13  | 4.03  | 10.31 | 4.74  | <0.01 |
| Of which:                            |                                                           |       |       |       |       |       |       |       |
| Dairy fat spread                     | 3.43                                                      | 3.07  | 6.03  | 1.13  | 3.28  | 10.31 | 4.74  | <0.01 |
| Vegetable spread                     | 6.33                                                      | 6.93  | 7.12  | <0.01 | 0.75  | <0.01 | <0.01 | <0.01 |
| Meat and meat products               | 10.33                                                     | 10.60 | 7.86  | 2.24  | 29.10 | 31.24 | 20.14 | 3.48  |
| Of which:                            |                                                           |       |       |       |       |       |       |       |
| Poultry                              | 3.30                                                      | 3.68  | 2.03  | 0.02  | 5.32  | 0.14  | 4.43  | 1.47  |
| Pork                                 | 0.68                                                      | 0.69  | 0.31  | <0.01 | 4.97  | <0.01 | 1.72  | 0.06  |
| Beef                                 | 0.98                                                      | 0.88  | 1.08  | 0.41  | 3.30  | 5.19  | 2.74  | <0.01 |
| Other meat                           | 0.54                                                      | 0.60  | 0.41  | <0.01 | 0.42  | <0.01 | <0.01 | <0.01 |
| Processed meat                       | 3.64                                                      | 3.73  | 2.03  | <0.01 | 12.43 | 16.67 | 6.87  | 1.70  |
| Breaded/battered chicken             | 0.74                                                      | 0.76  | 0.89  | 0.75  | 1.27  | 5.11  | 1.06  | 0.18  |
| Fish and fish dishes                 | 5.56                                                      | 2.66  | 3.27  | 89.01 | 23.09 | 30.05 | 49.57 | 88.25 |
| Of which:                            |                                                           |       |       |       |       |       |       |       |
| Breaded/battered fish                | 1.33                                                      | 1.32  | 1.97  | 0.79  | 0.27  | 0.77  | 0.80  | 1.55  |

|                                                       |       |       |       |       |       |       |       |       |
|-------------------------------------------------------|-------|-------|-------|-------|-------|-------|-------|-------|
| Other white fish, tinned tuna and shellfish           | 1.21  | 0.92  | 0.18  | 6.50  | 4.36  | 8.83  | 9.02  | 14.87 |
| Oily fish                                             | 3.01  | 0.42  | 1.12  | 81.73 | 18.46 | 20.45 | 39.75 | 71.83 |
| Vegetables and vegetable dishes                       | 16.13 | 15.15 | 21.02 | 0.66  | 1.13  | 1.66  | 0.97  | 0.01  |
| Of which:                                             |       |       |       |       |       |       |       |       |
| Vegetables including legumes/pulses                   | 2.34  | 2.20  | 2.04  | 0.02  | 0.08  | 0.16  | 0.08  | <0.01 |
| Vegetable dips, vegetable dishes and meat substitutes | 3.85  | 3.34  | 9.36  | 0.36  | 0.33  | <0.01 | 0.02  | 0.01  |
| Fried/roast potatoes                                  | 4.97  | 5.72  | 3.71  | <0.01 | 0.00  | <0.01 | 0.00  | <0.01 |
| Baked/boiled/mashed potatoes                          | 2.23  | 2.20  | 2.63  | 0.27  | 0.55  | 1.45  | 0.79  | <0.01 |
| Savoury snacks                                        | 6.51  | 8.04  | 1.79  | <0.01 | 0.05  | <0.01 | <0.01 | <0.01 |
| Nuts and seeds                                        | 10.00 | 11.10 | 10.27 | <0.01 | 0.04  | <0.01 | <0.01 | <0.01 |
| Sugars, preserves and sweet spreads                   | 1.12  | 1.35  | 0.57  | <0.01 | 0.11  | <0.01 | <0.01 | <0.01 |
| Of which:                                             |       |       |       |       |       |       |       |       |
| Chocolate confectionery                               | 1.05  | 1.26  | 0.55  | <0.01 | 0.11  | <0.01 | <0.01 | <0.01 |
| Miscellaneous                                         | 6.88  | 6.68  | 11.51 | 0.57  | 1.95  | 1.95  | 1.81  | 1.12  |
| Of which:                                             |       |       |       |       |       |       |       |       |
| Soups                                                 | 0.83  | 0.71  | 1.43  | 0.24  | 0.78  | 1.18  | 0.79  | 0.19  |
| Savoury sauces                                        | 5.63  | 5.53  | 9.87  | 0.12  | 0.96  | 0.33  | 0.39  | 0.16  |

---

18:2, linoleic acid; 18:3, alpha-linolenic acid; 18:4, stearidonic acid; 20:4, arachidonic acid; 20:5, eicosapentaenoic acid; 22:5, docosapentaenoic acid; 22:6, docosahexaenoic acid; FA, fatty acid; MCW, McCance and Widdowson; PUFA, polyunsaturated fatty acid; USDA, US Department of Agriculture. <sup>1</sup> Main food groups as described in Table S5. Food groups that contribute <0.5% to intake of total PUFAs are excluded from the table. All other food groups are included

**Table S10.** Dietary intakes of total energy and macronutrients by fifths, shaded cells depict participants categorised into the same (dark shading) or adjacent (light shading) quintile using the main dataset (UKNDB) and the individual FA dataset (MCW + USDA).

| Main dataset (UKNDB)              | Individual FA dataset (MCW + USDA) |       |       |       |       |
|-----------------------------------|------------------------------------|-------|-------|-------|-------|
|                                   | Q1                                 | Q2    | Q3    | Q4    | Q5    |
| <b>Total energy intake, kJ/d</b>  |                                    |       |       |       |       |
| Q1                                | 39686                              | 1914  | 0     | 0     | 0     |
| Q2                                | 1914                               | 37029 | 2656  | 0     | 0     |
| Q3                                | 0                                  | 2656  | 36305 | 2639  | 0     |
| Q4                                | 0                                  | 0     | 2639  | 37061 | 1899  |
| Q5                                | 0                                  | 0     | 0     | 1899  | 39700 |
| <b>Fat, g/d</b>                   |                                    |       |       |       |       |
| Q1                                | 38496                              | 3083  | 20    | 1     | 0     |
| Q2                                | 3073                               | 34150 | 4342  | 33    | 1     |
| Q3                                | 31                                 | 4289  | 32777 | 4489  | 14    |
| Q4                                | 0                                  | 77    | 4433  | 33713 | 3376  |
| Q5                                | 0                                  | 0     | 28    | 3363  | 38208 |
| <b>SFAs, g/d</b>                  |                                    |       |       |       |       |
| Q1                                | 37924                              | 3658  | 18    | 0     | 0     |
| Q2                                | 3633                               | 33145 | 4792  | 29    | 0     |
| Q3                                | 42                                 | 4744  | 32077 | 4724  | 13    |
| Q4                                | 1                                  | 51    | 4686  | 33430 | 3431  |
| Q5                                | 0                                  | 1     | 27    | 3416  | 38155 |
| <b>MUFAs, g/d</b>                 |                                    |       |       |       |       |
| Q1                                | 37533                              | 4024  | 41    | 2     | 0     |
| Q2                                | 4017                               | 32049 | 5464  | 68    | 1     |
| Q3                                | 48                                 | 5419  | 30538 | 5567  | 28    |
| Q4                                | 2                                  | 105   | 5516  | 31845 | 4132  |
| Q5                                | 0                                  | 2     | 41    | 4117  | 37438 |
| <b>PUFAs<sup>1</sup>, g/d</b>     |                                    |       |       |       |       |
| Q1                                | 35827                              | 5441  | 287   | 31    | 14    |
| Q2                                | 5464                               | 27870 | 7627  | 585   | 53    |
| Q3                                | 276                                | 7555  | 25340 | 8097  | 333   |
| Q4                                | 33                                 | 656   | 7791  | 26545 | 6573  |
| Q5                                | 0                                  | 77    | 555   | 6341  | 34626 |
| <b>n-3 PUFAs<sup>2</sup>, g/d</b> |                                    |       |       |       |       |
| Q1                                | 31724                              | 7144  | 1657  | 688   | 387   |
| Q2                                | 8514                               | 21389 | 8212  | 2445  | 1039  |
| Q3                                | 1207                               | 11158 | 18732 | 8183  | 2320  |
| Q4                                | 144                                | 1801  | 11871 | 19920 | 7863  |
| Q5                                | 11                                 | 107   | 1128  | 10363 | 29990 |
| <b>n-6 PUFAs<sup>3</sup>, g/d</b> |                                    |       |       |       |       |
| Q1                                | 34547                              | 6624  | 400   | 23    | 6     |
| Q2                                | 6251                               | 25087 | 9277  | 940   | 44    |
| Q3                                | 704                                | 8406  | 22327 | 9586  | 577   |
| Q4                                | 90                                 | 1303  | 8533  | 23772 | 7901  |
| Q5                                | 8                                  | 179   | 1063  | 7278  | 33071 |
| <b>TFAs, g/d</b>                  |                                    |       |       |       |       |
| Q1                                | 31374                              | 8765  | 1160  | 232   | 69    |

|                    |    |       |       |       |       |       |
|--------------------|----|-------|-------|-------|-------|-------|
| Carbohydrates, g/d | Q2 | 7465  | 22018 | 10398 | 1501  | 217   |
|                    | Q3 | 2012  | 8195  | 20508 | 10022 | 863   |
|                    | Q4 | 631   | 2231  | 8301  | 23156 | 7280  |
|                    | Q5 | 118   | 390   | 1233  | 6688  | 33170 |
|                    | Q1 | 39213 | 2387  | 0     | 0     | 0     |
|                    | Q2 | 2385  | 35729 | 3481  | 4     | 0     |
|                    | Q3 | 2     | 3469  | 34641 | 3487  | 1     |
|                    | Q4 | 0     | 14    | 3476  | 35548 | 2561  |
|                    | Q5 | 0     | 0     | 2     | 2560  | 39037 |
|                    | Q1 | 38167 | 3387  | 43    | 3     | 0     |
| Protein, g/d       | Q2 | 3421  | 33148 | 4943  | 80    | 7     |
|                    | Q3 | 11    | 5008  | 31501 | 5028  | 52    |
|                    | Q4 | 1     | 54    | 5092  | 32729 | 3723  |
|                    | Q5 | 0     | 2     | 21    | 3759  | 37817 |

ALA, alpha-linolenic acid; DHA, docosahexaenoic acid; DPA, docosapentaenoic acid; EPA, eicosapentaenoic acid; FA, fatty acid; g/d, grams per day; kJ/d, kilojoules per day; LA, linoleic acid; MCW, McCance and Widdowson; MUFA, monounsaturated fatty acid; PUFA, polyunsaturated fatty acid; Q, quintile; SFA, saturated fatty acid; TFA, trans fatty acid; UKNDB, UK nutrient databank; USDA, US Department of Agriculture. <sup>1</sup> For the main dataset this is the sum of n-3 and n-6 PUFAs. <sup>2</sup> For the individual FA dataset this is the sum of 18:3 (ALA), 18:4 (stearidonic acid), 20:5 (EPA), 22:5 (DPA) and 22:6 (DHA). <sup>3</sup> For the individual FA dataset this is the sum of 18:2 (LA) and 20:4 (arachidonic)



**Table S11.** Range of total energy and major nutrient intakes within each fifth in the main dataset (UKNDB) and the individual FA dataset (MCW + USDA) in 207,997 UK Biobank participants.

| Nutrients                    | Main dataset (UKNDB) |               |               |               |           | Individual FA dataset (MCW + USDA) |               |               |               |        |
|------------------------------|----------------------|---------------|---------------|---------------|-----------|------------------------------------|---------------|---------------|---------------|--------|
|                              | Q1                   | Q2            | Q3            | Q4            | Q5        | Q1                                 | Q2            | Q3            | Q4            | Q5     |
| Total energy intake, kJ/d    | ≤6711                | 6712 - 7850   | 7851 - 8916   | 8917 - 10319  | >10319.81 | ≤6568                              | 6570 - 7691   | 7692 - 8749   | 8750 - 10129  | >10130 |
| Fat, g/d                     | ≤50.22               | 50.23 - 63.31 | 63.32 - 75.99 | 76.00 - 92.62 | >92.64    | ≤48.79                             | 48.80 - 61.75 | 61.76 - 74.25 | 74.26 - 90.63 | >90.65 |
| SFAs, g/d                    | ≤17.30               | 17.31 - 22.71 | 22.72 - 28.06 | 28.07 - 35.33 | >35.34    | ≤16.49                             | 16.50 - 21.76 | 21.77 - 26.95 | 26.96 - 33.97 | >33.98 |
| MUFAs, g/d                   | ≤17.72               | 17.73 - 22.66 | 22.67 - 27.48 | 27.49 - 33.90 | >33.91    | ≤17.95                             | 17.96 - 23.13 | 23.14 - 28.17 | 28.18 - 34.84 | >34.86 |
| PUFAs <sup>1</sup> , g/d     | ≤8.32                | 8.33 - 10.80  | 10.81 - 13.26 | 13.27 - 16.69 | >16.70    | ≤8.19                              | 8.20 - 10.57  | 10.58 - 12.91 | 12.92 - 16.10 | >16.11 |
| n-3 PUFAs <sup>2</sup> , g/d | ≤1.20                | 1.21 - 1.59   | 1.60 - 2.01   | 2.02 - 2.61   | >2.62     | ≤1.06                              | 1.07 - 1.50   | 1.51 - 1.96   | 1.97 - 2.61   | >2.62  |
| n-6 PUFAs <sup>3</sup> , g/d | ≤6.87                | 6.88 - 9.03   | 9.04 - 11.19  | 11.20 - 14.23 | >14.24    | ≤6.23                              | 6.24 - 8.23   | 8.24 - 10.18  | 10.19 - 12.89 | >12.90 |
| TFAs, g/d                    | ≤0.65                | 0.66 - 0.94   | 0.95 - 1.22   | 1.23 - 1.62   | >1.63     | ≤0.53                              | 0.54 - 0.79   | 0.80 - 1.07   | 1.08 - 1.46   | >1.47  |
| Carbohydrates, g/d           | ≤192.5               | 192.6 - 229.9 | 230.0 - 264.2 | 264.3 - 309.0 | >309.1    | ≤188.6                             | 188.7 - 225.6 | 225.7 - 259.4 | 259.5 - 303.3 | >303.4 |
| Protein, g/d                 | ≤62.07               | 62.08 - 73.50 | 73.51 - 83.70 | 83.71 - 96.97 | >96.98    | ≤61.49                             | 61.50 - 72.81 | 72.82 - 82.97 | 82.98 - 96.09 | >96.10 |

ALA, alpha-linolenic acid; DHA, docosahexaenoic acid; DPA, docosapentaenoic acid; EPA, eicosapentaenoic acid; FA, fatty acid; g/d, grams per day; kJ/d, kilojoules per day; LA, linoleic acid; MCW, McCance and Widdowson; MUFA, monounsaturated fatty acid; PUFA, polyunsaturated fatty acid; Q, quintile; SFA, saturated fatty acid; TFA, trans fatty acid; UKNDB, UK nutrient databank; USDA, US Department of Agriculture. <sup>1</sup> For the main dataset this is the sum of n-3 and n-6 PUFAs. <sup>2</sup> For the individual FA dataset this is the sum of 18:3 (ALA), 18:4 (stearidonic acid), 20:5 (EPA), 22:5 (DPA) and 22:6 (DHA). <sup>3</sup> For the individual FA dataset this is the sum of 18:2 (LA) and 20:4 (arachidonic).

**Table S12.** Percentage contribution of food groups to intake of total SFAs, MUFAs, PUFAs and TFAs between the main dataset (UKNDB) and the individual FA dataset (MCW + USDA) in 207,997 UK Biobank participants.

| Food Groups <sup>1</sup>          | Main dataset (UKNDB)                                      |       |                    |                        |                        |       | Individual FA dataset (MCW + USDA)                        |       |                    |                        |                        |       |
|-----------------------------------|-----------------------------------------------------------|-------|--------------------|------------------------|------------------------|-------|-----------------------------------------------------------|-------|--------------------|------------------------|------------------------|-------|
|                                   | Percentage contribution of food groups to daily intake of |       |                    |                        |                        |       | Percentage contribution of food groups to daily intake of |       |                    |                        |                        |       |
|                                   | SFAs                                                      | MUFAs | PUFAs <sup>2</sup> | n-3 PUFAs <sup>3</sup> | n-6 PUFAs <sup>4</sup> | TFAs  | SFAs                                                      | MUFAs | PUFAs <sup>2</sup> | n-3 PUFAs <sup>3</sup> | n-6 PUFAs <sup>4</sup> | TFAs  |
| Cereals and cereal products       | 23.52                                                     | 21.12 | 23.12              | 18.67                  | 23.93                  | 14.37 | 23.72                                                     | 21.33 | 23.50              | 18.86                  | 25.16                  | 12.66 |
| Milk and milk products            | 28.73                                                     | 10.53 | 3.49               | 3.77                   | 3.44                   | 36.05 | 27.74                                                     | 10.75 | 3.62               | 4.39                   | 3.42                   | 34.55 |
| Eggs & egg dishes                 | 3.13                                                      | 4.75  | 4.01               | 3.67                   | 4.07                   | 1.60  | 3.14                                                      | 4.18  | 4.93               | 3.34                   | 5.55                   | 1.25  |
| Fat spreads                       | 10.67                                                     | 9.89  | 9.42               | 10.35                  | 9.26                   | 9.43  | 11.00                                                     | 9.90  | 9.95               | 11.39                  | 10.16                  | 10.49 |
| Meat and meat products            | 13.85                                                     | 15.88 | 9.91               | 9.60                   | 9.96                   | 22.88 | 13.46                                                     | 15.81 | 10.33              | 8.01                   | 10.80                  | 19.19 |
| Fish and fish dishes              | 2.08                                                      | 3.61  | 5.42               | 18.80                  | 2.98                   | 2.40  | 1.82                                                      | 3.79  | 5.56               | 15.33                  | 2.88                   | 0.19  |
| Vegetables and vegetable dishes   | 6.09                                                      | 12.36 | 19.76              | 18.43                  | 20.01                  | 6.20  | 6.31                                                      | 12.21 | 16.13              | 17.61                  | 14.99                  | 3.46  |
| Savoury snacks                    | 1.40                                                      | 5.69  | 3.63               | 1.21                   | 4.07                   | 0.35  | 1.33                                                      | 5.66  | 6.51               | 1.50                   | 7.95                   | 0.44  |
| Nuts & seeds                      | 1.03                                                      | 3.50  | 7.32               | 2.89                   | 8.13                   | 0.70  | 2.13                                                      | 5.92  | 10.00              | 8.57                   | 10.98                  | 0.00  |
| Fruit                             | 0.01                                                      | 0.01  | 0.08               | 0.14                   | 0.06                   | 0.00  | 0.42                                                      | 0.27  | 1.46               | 0.67                   | 0.13                   | 0.00  |
| Sugars, preserves & sweet spreads | 4.97                                                      | 3.31  | 0.89               | 0.33                   | 1.00                   | 1.10  | 5.42                                                      | 3.40  | 1.12               | 0.48                   | 1.34                   | 0.98  |
| Non-alcoholic beverages           | 0.02                                                      | 0.01  | 0.10               | 0.21                   | 0.08                   | 0.00  | 0.00                                                      | 0.00  | 0.00               | 0.00                   | 0.00                   | 0.00  |
| Alcoholic beverages               | 0.06                                                      | 0.02  | 0.00               | 0.01                   | 0.00                   | 0.07  | 0.06                                                      | 0.03  | 0.01               | 0.02                   | 0.01                   | 0.00  |
| Miscellaneous                     | 3.03                                                      | 6.06  | 8.32               | 8.35                   | 8.32                   | 4.84  | 3.44                                                      | 6.76  | 6.88               | 9.81                   | 6.62                   | 4.18  |

ALA, alpha-linolenic acid; DHA, docosahexaenoic acid; DPA, docosapentaenoic acid; EPA, eicosapentaenoic acid; FA, fatty acid; g/d, grams per day; LA, linoleic acid; MCW, McCance and Widdowson; MUFA, monounsaturated fatty acid; PUFA, polyunsaturated fatty acid; SFA, saturated fatty acid; TFA, trans fatty acid; UKNDB, UK nutrient databank; USDA US Department of Agriculture. <sup>1</sup> Primary food groups as described in Supplementary Table 5. <sup>2</sup> For the main dataset this is the sum of n-3 and n-6 PUFAs. <sup>3</sup> For the individual FA dataset this is the sum of 18:3 (ALA), 18:4 (stearidonic acid), 20:5 (EPA), 22:5 (DPA) and 22:6 (DHA). <sup>4</sup> For the individual FA dataset this is the sum of 18:2 (LA) and 20:4 (arachidonic).

## Supplementary Figures

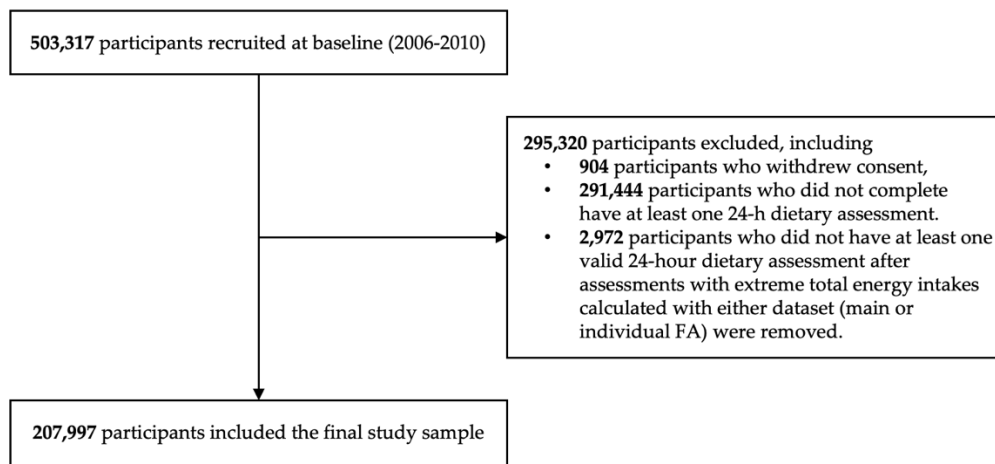

**Figure S1.** Flow chart of UK Biobank participants included in this study to assess nutrient intakes estimated from the individual FA dataset (n=207,997). FA fatty acid.
