# Supplementary material for: Evaluation of the New Individual Fatty Acid Dataset for UK Biobank: Analysis of Intakes and Sources in 207,997 Participants
Source: MDPI journal article supplement (doi:10.3390/nu14173603), 2022-08-31
Supplement: s1 [file s1]

**Table S1.** Individual FA and major nutrient calculation in the individual FA dataset (MCW + USDA). USDA food codes are highlighted in red.

[illegible]

Table S1. Individual FA and major nutrient calculation in the individual FA dataset (MCW + USDA). USDA food codes are highlighted in red.

| Food item                     | Grams per 100g of food item <sup>1</sup> |            |             |             | Codes for foods from MCW and USDA and the fraction (%) assigned to each code <sup>2</sup> |            |        |            |        |            |          |            |        |            |        |            |        |            |        |            |        |            |         |             |         |
|-------------------------------|------------------------------------------|------------|-------------|-------------|-------------------------------------------------------------------------------------------|------------|--------|------------|--------|------------|----------|------------|--------|------------|--------|------------|--------|------------|--------|------------|--------|------------|---------|-------------|---------|
|                               | Total fat                                | Total SFAs | Total MUFAs | Total PUFAs | Code 1                                                                                    | Fraction 1 | Code 2 | Fraction 2 | Code 3 | Fraction 3 | Code 4   | Fraction 4 | Code 5 | Fraction 5 | Code 6 | Fraction 6 | Code 7 | Fraction 7 | Code 8 | Fraction 8 | Code 9 | Fraction 9 | Code 10 | Fraction 10 | Code 11 |
| brdbag_s_olive_fat_thick      | 59.10                                    | 13.22      | 31.37       | 11.53       | 12-505                                                                                    | 100        |        |            |        |            |          |            |        |            |        |            |        |            |        |            |        |            |         |             |         |
| brdbag_s_olive_fat_thin       | 59.10                                    | 13.22      | 31.37       | 11.53       | 12-505                                                                                    | 100        |        |            |        |            |          |            |        |            |        |            |        |            |        |            |        |            |         |             |         |
| brdbag_s_olive_lowfat_med     | 38.90                                    | 8.90       | 21.68       | 6.36        | 12-498                                                                                    | 100        |        |            |        |            |          |            |        |            |        |            |        |            |        |            |        |            |         |             |         |
| brdbag_s_olive_lowfat_thick   | 38.90                                    | 8.90       | 21.68       | 6.36        | 12-498                                                                                    | 100        |        |            |        |            |          |            |        |            |        |            |        |            |        |            |        |            |         |             |         |
| brdbag_s_olive_lowfat_thin    | 38.90                                    | 8.90       | 21.68       | 6.36        | 12-498                                                                                    | 100        |        |            |        |            |          |            |        |            |        |            |        |            |        |            |        |            |         |             |         |
| brdbag_s_olive_vlowfat_med    | 38.90                                    | 8.90       | 21.68       | 6.36        | 12-498                                                                                    | 100        |        |            |        |            |          |            |        |            |        |            |        |            |        |            |        |            |         |             |         |
| brdbag_s_olive_vlowfat_thick  | 38.90                                    | 8.90       | 21.68       | 6.36        | 12-498                                                                                    | 100        |        |            |        |            |          |            |        |            |        |            |        |            |        |            |        |            |         |             |         |
| brdbag_s_olive_vlowfat_thin   | 38.90                                    | 8.90       | 21.68       | 6.36        | 12-498                                                                                    | 100        |        |            |        |            |          |            |        |            |        |            |        |            |        |            |        |            |         |             |         |
| brdbag_s_other_med            | 68.67                                    | 33.71      | 21.43       | 9.30        | 81204000                                                                                  | 18         | 17-685 | 16         | 17-661 | 16         | 12-499   | 12.5       | 12-503 | 12.5       | 12-497 | 12.5       | 12-504 | 12.5       |        |            |        |            |         |             |         |
| brdbag_s_other_thick          | 68.67                                    | 33.71      | 21.43       | 9.30        | 81204000                                                                                  | 18         | 17-685 | 16         | 17-661 | 16         | 12-499   | 12.5       | 12-503 | 12.5       | 12-497 | 12.5       | 12-504 | 12.5       |        |            |        |            |         |             |         |
| brdbag_s_other_thin           | 68.67                                    | 33.71      | 21.43       | 9.30        | 81204000                                                                                  | 18         | 17-685 | 16         | 17-661 | 16         | 12-499   | 12.5       | 12-503 | 12.5       | 12-497 | 12.5       | 12-504 | 12.5       |        |            |        |            |         |             |         |
| brdbag_s_poly_chol_med        | 36.90                                    | 8.55       | 11.50       | 14.96       | 12-499                                                                                    | 100        |        |            |        |            |          |            |        |            |        |            |        |            |        |            |        |            |         |             |         |
| brdbag_s_poly_chol_thick      | 36.90                                    | 8.55       | 11.50       | 14.96       | 12-499                                                                                    | 100        |        |            |        |            |          |            |        |            |        |            |        |            |        |            |        |            |         |             |         |
| brdbag_s_poly_chol_thin       | 36.90                                    | 8.55       | 11.50       | 14.96       | 12-499                                                                                    | 100        |        |            |        |            |          |            |        |            |        |            |        |            |        |            |        |            |         |             |         |
| brdbag_s_poly_dunno_med       | 48.05                                    | 10.88      | 14.60       | 20.07       | 12-499                                                                                    | 50         | 12-503 | 50         |        |            |          |            |        |            |        |            |        |            |        |            |        |            |         |             |         |
| brdbag_s_poly_dunno_thick     | 48.05                                    | 10.88      | 14.60       | 20.07       | 12-499                                                                                    | 50         | 12-503 | 50         |        |            |          |            |        |            |        |            |        |            |        |            |        |            |         |             |         |
| brdbag_s_poly_dunno_thin      | 48.05                                    | 10.88      | 14.60       | 20.07       | 12-499                                                                                    | 50         | 12-503 | 50         |        |            |          |            |        |            |        |            |        |            |        |            |        |            |         |             |         |
| brdbag_s_poly_fat_med         | 59.20                                    | 13.21      | 17.70       | 25.17       | 12-503                                                                                    | 100        |        |            |        |            |          |            |        |            |        |            |        |            |        |            |        |            |         |             |         |
| brdbag_s_poly_fat_thick       | 59.20                                    | 13.21      | 17.70       | 25.17       | 12-503                                                                                    | 100        |        |            |        |            |          |            |        |            |        |            |        |            |        |            |        |            |         |             |         |
| brdbag_s_poly_fat_thin        | 59.20                                    | 13.21      | 17.70       | 25.17       | 12-503                                                                                    | 100        |        |            |        |            |          |            |        |            |        |            |        |            |        |            |        |            |         |             |         |
| brdbag_s_poly_lowfat_med      | 36.90                                    | 8.55       | 11.50       | 14.96       | 12-499                                                                                    | 100        |        |            |        |            |          |            |        |            |        |            |        |            |        |            |        |            |         |             |         |
| brdbag_s_poly_lowfat_thick    | 36.90                                    | 8.55       | 11.50       | 14.96       | 12-499                                                                                    | 100        |        |            |        |            |          |            |        |            |        |            |        |            |        |            |        |            |         |             |         |
| brdbag_s_poly_lowfat_thin     | 36.90                                    | 8.55       | 11.50       | 14.96       | 12-499                                                                                    | 100        |        |            |        |            |          |            |        |            |        |            |        |            |        |            |        |            |         |             |         |
| brdbag_s_poly_vlowfat_med     | 36.90                                    | 8.55       | 11.50       | 14.96       | 12-499                                                                                    | 100        |        |            |        |            |          |            |        |            |        |            |        |            |        |            |        |            |         |             |         |
| brdbag_s_poly_vlowfat_thick   | 36.90                                    | 8.55       | 11.50       | 14.96       | 12-499                                                                                    | 100        |        |            |        |            |          |            |        |            |        |            |        |            |        |            |        |            |         |             |         |
| brdbag_s_poly_vlowfat_thin    | 36.90                                    | 8.55       | 11.50       | 14.96       | 12-499                                                                                    | 100        |        |            |        |            |          |            |        |            |        |            |        |            |        |            |        |            |         |             |         |
| brdbag_s_soya_chol_med        | 36.90                                    | 8.55       | 11.50       | 14.96       | 12-499                                                                                    | 100        |        |            |        |            |          |            |        |            |        |            |        |            |        |            |        |            |         |             |         |
| brdbag_s_soya_chol_thick      | 36.90                                    | 8.55       | 11.50       | 14.96       | 12-499                                                                                    | 100        |        |            |        |            |          |            |        |            |        |            |        |            |        |            |        |            |         |             |         |
| brdbag_s_soya_chol_thin       | 36.90                                    | 8.55       | 11.50       | 14.96       | 12-499                                                                                    | 100        |        |            |        |            |          |            |        |            |        |            |        |            |        |            |        |            |         |             |         |
| brdbag_s_soya_dunno_med       | 48.05                                    | 10.88      | 14.60       | 20.07       | 12-499                                                                                    | 50         | 12-503 | 50         |        |            |          |            |        |            |        |            |        |            |        |            |        |            |         |             |         |
| brdbag_s_soya_dunno_thick     | 48.05                                    | 10.88      | 14.60       | 20.07       | 12-499                                                                                    | 50         | 12-503 | 50         |        |            |          |            |        |            |        |            |        |            |        |            |        |            |         |             |         |
| brdbag_s_soya_dunno_thin      | 48.05                                    | 10.88      | 14.60       | 20.07       | 12-499                                                                                    | 50         | 12-503 | 50         |        |            |          |            |        |            |        |            |        |            |        |            |        |            |         |             |         |
| brdbag_s_soya_fat_med         | 59.20                                    | 13.21      | 17.70       | 25.17       | 12-503                                                                                    | 100        |        |            |        |            |          |            |        |            |        |            |        |            |        |            |        |            |         |             |         |
| brdbag_s_soya_fat_thick       | 59.20                                    | 13.21      | 17.70       | 25.17       | 12-503                                                                                    | 100        |        |            |        |            |          |            |        |            |        |            |        |            |        |            |        |            |         |             |         |
| brdbag_s_soya_fat_thin        | 59.20                                    | 13.21      | 17.70       | 25.17       | 12-503                                                                                    | 100        |        |            |        |            |          |            |        |            |        |            |        |            |        |            |        |            |         |             |         |
| brdbag_s_soya_lowfat_med      | 36.90                                    | 8.55       | 11.50       | 14.96       | 12-499                                                                                    | 100        |        |            |        |            |          |            |        |            |        |            |        |            |        |            |        |            |         |             |         |
| brdbag_s_soya_lowfat_thick    | 36.90                                    | 8.55       | 11.50       | 14.96       | 12-499                                                                                    | 100        |        |            |        |            |          |            |        |            |        |            |        |            |        |            |        |            |         |             |         |
| brdbag_s_soya_lowfat_thin     | 36.90                                    | 8.55       | 11.50       | 14.96       | 12-499                                                                                    | 100        |        |            |        |            |          |            |        |            |        |            |        |            |        |            |        |            |         |             |         |
| brdbag_s_soya_vlowfat_med     | 36.90                                    | 8.55       | 11.50       | 14.96       | 12-499                                                                                    | 100        |        |            |        |            |          |            |        |            |        |            |        |            |        |            |        |            |         |             |         |
| brdbag_s_soya_vlowfat_thick   | 36.90                                    | 8.55       | 11.50       | 14.96       | 12-499                                                                                    | 100        |        |            |        |            |          |            |        |            |        |            |        |            |        |            |        |            |         |             |         |
| brdbag_s_soya_vlowfat_thin    | 36.90                                    | 8.55       | 11.50       | 14.96       | 12-499                                                                                    | 100        |        |            |        |            |          |            |        |            |        |            |        |            |        |            |        |            |         |             |         |
| brdcric_s_butt_fat_med        | 79.10                                    | 34.15      | 29.54       | 10.00       | 17-655                                                                                    | 100        |        |            |        |            |          |            |        |            |        |            |        |            |        |            |        |            |         |             |         |
| brdcric_s_butt_fat_thick      | 79.10                                    | 34.15      | 29.54       | 10.00       | 17-655                                                                                    | 100        |        |            |        |            |          |            |        |            |        |            |        |            |        |            |        |            |         |             |         |
| brdcric_s_butt_fat_thin       | 79.10                                    | 34.15      | 29.54       | 10.00       | 17-655                                                                                    | 100        |        |            |        |            |          |            |        |            |        |            |        |            |        |            |        |            |         |             |         |
| brdcric_s_butt_lowfat_med     | 60.20                                    | 25.70      | 22.66       | 7.75        | 17-656                                                                                    | 100        |        |            |        |            |          |            |        |            |        |            |        |            |        |            |        |            |         |             |         |
| brdcric_s_butt_lowfat_thick   | 60.20                                    | 25.70      | 22.66       | 7.75        | 17-656                                                                                    | 100        |        |            |        |            |          |            |        |            |        |            |        |            |        |            |        |            |         |             |         |
| brdcric_s_butt_lowfat_thin    | 60.20                                    | 25.70      | 22.66       | 7.75        | 17-656                                                                                    | 100        |        |            |        |            |          |            |        |            |        |            |        |            |        |            |        |            |         |             |         |
| brdcric_s_butter_dunno_med    | 80.65                                    | 43.12      | 25.23       | 6.42        | 17-655                                                                                    | 50         | 17-685 | 25         | 17-661 | 25         |          |            |        |            |        |            |        |            |        |            |        |            |         |             |         |
| brdcric_s_butter_dunno_thick  | 80.65                                    | 43.12      | 25.23       | 6.42        | 17-655                                                                                    | 50         | 17-685 | 25         | 17-661 | 25         |          |            |        |            |        |            |        |            |        |            |        |            |         |             |         |
| brdcric_s_butter_dunno_thin   | 80.65                                    | 43.12      | 25.23       | 6.42        | 17-655                                                                                    | 50         | 17-685 | 25         | 17-661 | 25         |          |            |        |            |        |            |        |            |        |            |        |            |         |             |         |
| brdcric_s_butter_fat_med      | 82.20                                    | 52.09      | 20.91       | 2.83        | 17-685                                                                                    | 50         | 17-661 | 50         |        |            |          |            |        |            |        |            |        |            |        |            |        |            |         |             |         |
| brdcric_s_butter_fat_thick    | 82.20                                    | 52.09      | 20.91       | 2.83        | 17-685                                                                                    | 50         | 17-661 | 50         |        |            |          |            |        |            |        |            |        |            |        |            |        |            |         |             |         |
| brdcric_s_butter_fat_thin     | 82.20                                    | 52.09      | 20.91       | 2.83        | 17-685                                                                                    | 50         | 17-661 | 50         |        |            |          |            |        |            |        |            |        |            |        |            |        |            |         |             |         |
| brdcric_s_butter_lowfat_med   | 60.20                                    | 25.70      | 22.66       | 7.75        | 17-656                                                                                    | 100        |        |            |        |            |          |            |        |            |        |            |        |            |        |            |        |            |         |             |         |
| brdcric_s_butter_lowfat_thick | 60.20                                    | 25.70      | 22.66       | 7.75        | 17-656                                                                                    | 100        |        |            |        |            |          |            |        |            |        |            |        |            |        |            |        |            |         |             |         |
| brdcric_s_butter_lowfat_thin  | 60.20                                    | 25.70      | 22.66       | 7.75        | 17-656                                                                                    | 100        |        |            |        |            |          |            |        |            |        |            |        |            |        |            |        |            |         |             |         |
| brdcric_s_dairy_chol_med      | 39.00                                    | 9.76       | 17.39       | 9.82        | 12-497                                                                                    | 100        |        |            |        |            |          |            |        |            |        |            |        |            |        |            |        |            |         |             |         |
| brdcric_s_dairy_chol_thick    | 39.00                                    | 9.76       | 17.39       | 9.82        | 12-497                                                                                    | 100        |        |            |        |            |          |            |        |            |        |            |        |            |        |            |        |            |         |             |         |
| brdcric_s_dairy_chol_thin     | 39.00                                    | 9.76       | 17.39       | 9.82        | 12-497                                                                                    | 100        |        |            |        |            |          |            |        |            |        |            |        |            |        |            |        |            |         |             |         |
| brdcric_s_dairy_dunno_med     | 49.80                                    | 12.69      | 23.67       | 10.86       | 12-497                                                                                    | 50         | 12-504 | 50         |        |            |          |            |        |            |        |            |        |            |        |            |        |            |         |             |         |
| brdcric_s_dairy_dunno_thick   | 49.80                                    | 12.69      | 23.67       | 10.86       | 12-497                                                                                    | 50         | 12-504 | 50         |        |            |          |            |        |            |        |            |        |            |        |            |        |            |         |             |         |
| brdcric_s_dairy_dunno_thin    | 49.80                                    | 12.69      | 23.67       | 10.86       | 12-497                                                                                    | 50         | 12-504 | 50         |        |            |          |            |        |            |        |            |        |            |        |            |        |            |         |             |         |
| brdcric_s_dairy_fat_med       | 60.60                                    | 15.61      | 29.95       | 11.90       | 12-504                                                                                    | 100        |        |            |        |            |          |            |        |            |        |            |        |            |        |            |        |            |         |             |         |
| brdcric_s_dairy_fat_thick     | 60.60                                    | 15.61      | 29.95       | 11.90       | 12-504                                                                                    | 100        |        |            |        |            |          |            |        |            |        |            |        |            |        |            |        |            |         |             |         |
| brdcric_s_dairy_fat_thin      | 60.60                                    | 15.61      | 29.95       | 11.90       | 12-504                                                                                    | 100        |        |            |        |            |          |            |        |            |        |            |        |            |        |            |        |            |         |             |         |
| brdcric_s_dairy_lowfat_med    | 39.00                                    | 9.76       | 17.39       | 9.82        | 12-497                                                                                    | 100        |        |            |        |            |          |            |        |            |        |            |        |            |        |            |        |            |         |             |         |
| brdcric_s_dairy_lowfat_thick  | 39.00                                    | 9.76       | 17.39       | 9.82        | 12-497                                                                                    | 100        |        |            |        |            |          |            |        |            |        |            |        |            |        |            |        |            |         |             |         |
| brdcric_s_dairy_lowfat_thin   | 39.00                                    | 9.76       | 17.39       | 9.82        | 12-497                                                                                    | 100        |        |            |        |            |          |            |        |            |        |            |        |            |        |            |        |            |         |             |         |
| brdcric_s_dairy_vlowfat_med   | 39.00                                    | 9.76       | 17.39       | 9.82        | 12-497                                                                                    | 100        |        |            |        |            |          |            |        |            |        |            |        |            |        |            |        |            |         |             |         |
| brdcric_s_dairy_vlowfat_thick | 39.00                                    | 9.76       | 17.39       | 9.82        | 12-497                                                                                    | 100        |        |            |        |            |          |            |        |            |        |            |        |            |        |            |        |            |         |             |         |
| brdcric_s_dairy_vlowfat_thin  | 39.00                                    | 9.76       | 17.39       | 9.82        | 12-497                                                                                    | 100        |        |            |        |            |          |            |        |            |        |            |        |            |        |            |        |            |         |             |         |
| brdcric_s_dunno_chol_med      | 37.95                                    | 9.16       | 14.45       | 12.39       | 12-497                                                                                    | 50         | 12-499 | 50         |        |            |          |            |        |            |        |            |        |            |        |            |        |            |         |             |         |
| brdcric_s_dunno_chol_thick    | 37.95                                    | 9.16       | 14.45       | 12.39       | 12-497                                                                                    | 50         | 12-499 | 50         |        |            |          |            |        |            |        |            |        |            |        |            |        |            |         |             |         |
| brdcric_s_dunno_chol_thin     | 37.95                                    | 9.16       | 14.45       | 12.39       | 12-497                                                                                    | 50         | 12-499 | 50         |        |            |          |            |        |            |        |            |        |            |        |            |        |            |         |             |         |
| brdcric_s_dunno_dunno_med     | 48.93                                    | 11.78      | 19.14       | 15.46       | 12-497                                                                                    | 25         | 12-499 | 25         | 12-503 | 25         | 12-504</ |            |        |            |        |            |        |            |        |            |        |            |         |             |         |

**Table S1.** Individual FA and major nutrient calculation in the individual FA dataset (MCW + USDA). USDA food codes are highlighted in red.

[illegible]

**Table S1.** Individual FA and major nutrient calculation in the individual FA dataset (MCW + USDA). USDA food codes are highlighted in red.

| Food item                       | Grams per 100g of food item <sup>1</sup> |            |             |             | Codes for foods from MCW and USDA and the fraction (%) assigned to each code <sup>2</sup> |            |        |            |        |            |        |            |        |            |        |            |        |            |        |            |        |            |         |             |         |             |
|---------------------------------|------------------------------------------|------------|-------------|-------------|-------------------------------------------------------------------------------------------|------------|--------|------------|--------|------------|--------|------------|--------|------------|--------|------------|--------|------------|--------|------------|--------|------------|---------|-------------|---------|-------------|
|                                 | Total fat                                | Total SFAs | Total MUFAs | Total PUFAs | Code 1                                                                                    | Fraction 1 | Code 2 | Fraction 2 | Code 3 | Fraction 3 | Code 4 | Fraction 4 | Code 5 | Fraction 5 | Code 6 | Fraction 6 | Code 7 | Fraction 7 | Code 8 | Fraction 8 | Code 9 | Fraction 9 | Code 10 | Fraction 10 | Code 11 | Fraction 11 |
| brdlbp_s_butterspr_lowfat_thick | 60.20                                    | 25.70      | 22.66       | 7.75        | 17-656                                                                                    | 100        |        |            |        |            |        |            |        |            |        |            |        |            |        |            |        |            |         |             |         |             |
| brdlbp_s_butterspr_lowfat_thin  | 60.20                                    | 25.70      | 22.66       | 7.75        | 17-656                                                                                    | 100        |        |            |        |            |        |            |        |            |        |            |        |            |        |            |        |            |         |             |         |             |
| brdlbp_s_dairy_chol_med         | 39.00                                    | 9.76       | 17.39       | 9.82        | 12-497                                                                                    | 100        |        |            |        |            |        |            |        |            |        |            |        |            |        |            |        |            |         |             |         |             |
| brdlbp_s_dairy_chol_thick       | 39.00                                    | 9.76       | 17.39       | 9.82        | 12-497                                                                                    | 100        |        |            |        |            |        |            |        |            |        |            |        |            |        |            |        |            |         |             |         |             |
| brdlbp_s_dairy_chol_thin        | 39.00                                    | 9.76       | 17.39       | 9.82        | 12-497                                                                                    | 100        |        |            |        |            |        |            |        |            |        |            |        |            |        |            |        |            |         |             |         |             |
| brdlbp_s_dairy_dunno_med        | 49.80                                    | 12.69      | 23.67       | 10.86       | 12-497                                                                                    | 50         | 12-504 | 50         |        |            |        |            |        |            |        |            |        |            |        |            |        |            |         |             |         |             |
| brdlbp_s_dairy_dunno_thick      | 49.80                                    | 12.69      | 23.67       | 10.86       | 12-497                                                                                    | 50         | 12-504 | 50         |        |            |        |            |        |            |        |            |        |            |        |            |        |            |         |             |         |             |
| brdlbp_s_dairy_dunno_thin       | 49.80                                    | 12.69      | 23.67       | 10.86       | 12-497                                                                                    | 50         | 12-504 | 50         |        |            |        |            |        |            |        |            |        |            |        |            |        |            |         |             |         |             |
| brdlbp_s_dairy_fat_med          | 60.60                                    | 15.61      | 29.95       | 11.90       | 12-504                                                                                    | 100        |        |            |        |            |        |            |        |            |        |            |        |            |        |            |        |            |         |             |         |             |
| brdlbp_s_dairy_fat_thick        | 60.60                                    | 15.61      | 29.95       | 11.90       | 12-504                                                                                    | 100        |        |            |        |            |        |            |        |            |        |            |        |            |        |            |        |            |         |             |         |             |
| brdlbp_s_dairy_fat_thin         | 60.60                                    | 15.61      | 29.95       | 11.90       | 12-504                                                                                    | 100        |        |            |        |            |        |            |        |            |        |            |        |            |        |            |        |            |         |             |         |             |
| brdlbp_s_dairy_lowfat_med       | 39.00                                    | 9.76       | 17.39       | 9.82        | 12-497                                                                                    | 100        |        |            |        |            |        |            |        |            |        |            |        |            |        |            |        |            |         |             |         |             |
| brdlbp_s_dairy_lowfat_thick     | 39.00                                    | 9.76       | 17.39       | 9.82        | 12-497                                                                                    | 100        |        |            |        |            |        |            |        |            |        |            |        |            |        |            |        |            |         |             |         |             |
| brdlbp_s_dairy_lowfat_thin      | 39.00                                    | 9.76       | 17.39       | 9.82        | 12-497                                                                                    | 100        |        |            |        |            |        |            |        |            |        |            |        |            |        |            |        |            |         |             |         |             |
| brdlbp_s_dairy_vlowfat_med      | 39.00                                    | 9.76       | 17.39       | 9.82        | 12-497                                                                                    | 100        |        |            |        |            |        |            |        |            |        |            |        |            |        |            |        |            |         |             |         |             |
| brdlbp_s_dairy_vlowfat_thick    | 39.00                                    | 9.76       | 17.39       | 9.82        | 12-497                                                                                    | 100        |        |            |        |            |        |            |        |            |        |            |        |            |        |            |        |            |         |             |         |             |
| brdlbp_s_dairy_vlowfat_thin     | 39.00                                    | 9.76       | 17.39       | 9.82        | 12-497                                                                                    | 100        |        |            |        |            |        |            |        |            |        |            |        |            |        |            |        |            |         |             |         |             |
| brdlbp_s_dunno_chol_med         | 37.95                                    | 9.16       | 14.45       | 12.39       | 12-497                                                                                    | 50         | 12-499 | 50         |        |            |        |            |        |            |        |            |        |            |        |            |        |            |         |             |         |             |
| brdlbp_s_dunno_chol_thick       | 37.95                                    | 9.16       | 14.45       | 12.39       | 12-497                                                                                    | 50         | 12-499 | 50         |        |            |        |            |        |            |        |            |        |            |        |            |        |            |         |             |         |             |
| brdlbp_s_dunno_chol_thin        | 37.95                                    | 9.16       | 14.45       | 12.39       | 12-497                                                                                    | 50         | 12-499 | 50         |        |            |        |            |        |            |        |            |        |            |        |            |        |            |         |             |         |             |
| brdlbp_s_dunno_dunno_med        | 48.93                                    | 11.78      | 19.14       | 15.46       | 12-497                                                                                    | 25         | 12-499 | 25         | 12-503 | 25         | 12-504 | 25         |        |            |        |            |        |            |        |            |        |            |         |             |         |             |
| brdlbp_s_dunno_dunno_thick      | 48.93                                    | 11.78      | 19.14       | 15.46       | 12-497                                                                                    | 25         | 12-499 | 25         | 12-503 | 25         | 12-504 | 25         |        |            |        |            |        |            |        |            |        |            |         |             |         |             |
| brdlbp_s_dunno_dunno_thin       | 48.93                                    | 11.78      | 19.14       | 15.46       | 12-497                                                                                    | 25         | 12-499 | 25         | 12-503 | 25         | 12-504 | 25         |        |            |        |            |        |            |        |            |        |            |         |             |         |             |
| brdlbp_s_dunno_fat_med          | 59.90                                    | 14.41      | 23.83       | 18.54       | 12-503                                                                                    | 50         | 12-504 | 50         |        |            |        |            |        |            |        |            |        |            |        |            |        |            |         |             |         |             |
| brdlbp_s_dunno_fat_thick        | 59.90                                    | 14.41      | 23.83       | 18.54       | 12-503                                                                                    | 50         | 12-504 | 50         |        |            |        |            |        |            |        |            |        |            |        |            |        |            |         |             |         |             |
| brdlbp_s_dunno_fat_thin         | 59.90                                    | 14.41      | 23.83       | 18.54       | 12-503                                                                                    | 50         | 12-504 | 50         |        |            |        |            |        |            |        |            |        |            |        |            |        |            |         |             |         |             |
| brdlbp_s_dunno_lowfat_med       | 37.95                                    | 9.16       | 14.45       | 12.39       | 12-497                                                                                    | 50         | 12-499 | 50         |        |            |        |            |        |            |        |            |        |            |        |            |        |            |         |             |         |             |
| brdlbp_s_dunno_lowfat_thick     | 37.95                                    | 9.16       | 14.45       | 12.39       | 12-497                                                                                    | 50         | 12-499 | 50         |        |            |        |            |        |            |        |            |        |            |        |            |        |            |         |             |         |             |
| brdlbp_s_dunno_lowfat_thin      | 37.95                                    | 9.16       | 14.45       | 12.39       | 12-497                                                                                    | 50         | 12-499 | 50         |        |            |        |            |        |            |        |            |        |            |        |            |        |            |         |             |         |             |
| brdlbp_s_dunno_vlowfat_med      | 37.95                                    | 9.16       | 14.45       | 12.39       | 12-497                                                                                    | 50         | 12-499 | 50         |        |            |        |            |        |            |        |            |        |            |        |            |        |            |         |             |         |             |
| brdlbp_s_dunno_vlowfat_thick    | 37.95                                    | 9.16       | 14.45       | 12.39       | 12-497                                                                                    | 50         | 12-499 | 50         |        |            |        |            |        |            |        |            |        |            |        |            |        |            |         |             |         |             |
| brdlbp_s_dunno_vlowfat_thin     | 37.95                                    | 9.16       | 14.45       | 12.39       | 12-497                                                                                    | 50         | 12-499 | 50         |        |            |        |            |        |            |        |            |        |            |        |            |        |            |         |             |         |             |
| brdlbp_s_hardmarg_med           | 76.40                                    | 26.41      | 34.00       | 12.21       | 12-500                                                                                    | 100        |        |            |        |            |        |            |        |            |        |            |        |            |        |            |        |            |         |             |         |             |
| brdlbp_s_hardmarg_thick         | 76.40                                    | 26.41      | 34.00       | 12.21       | 12-500                                                                                    | 100        |        |            |        |            |        |            |        |            |        |            |        |            |        |            |        |            |         |             |         |             |
| brdlbp_s_hardmarg_thin          | 76.40                                    | 26.41      | 34.00       | 12.21       | 12-500                                                                                    | 100        |        |            |        |            |        |            |        |            |        |            |        |            |        |            |        |            |         |             |         |             |
| brdlbp_s_olive_chol_med         | 38.90                                    | 8.90       | 21.68       | 6.36        | 12-498                                                                                    | 100        |        |            |        |            |        |            |        |            |        |            |        |            |        |            |        |            |         |             |         |             |
| brdlbp_s_olive_chol_thick       | 38.90                                    | 8.90       | 21.68       | 6.36        | 12-498                                                                                    | 100        |        |            |        |            |        |            |        |            |        |            |        |            |        |            |        |            |         |             |         |             |
| brdlbp_s_olive_chol_thin        | 38.90                                    | 8.90       | 21.68       | 6.36        | 12-498                                                                                    | 100        |        |            |        |            |        |            |        |            |        |            |        |            |        |            |        |            |         |             |         |             |
| brdlbp_s_olive_dunno_med        | 49.00                                    | 11.06      | 26.53       | 8.95        | 12-498                                                                                    | 50         | 12-505 | 50         |        |            |        |            |        |            |        |            |        |            |        |            |        |            |         |             |         |             |
| brdlbp_s_olive_dunno_thick      | 49.00                                    | 11.06      | 26.53       |             |                                                                                           |            |        |            |        |            |        |            |        |            |        |            |        |            |        |            |        |            |         |             |         |             |

Table S1. Individual FA and major nutrient calculation in the individual FA dataset (MCW + USDA). USDA food codes are highlighted in red.

| Food item                     | Grams per 100g of food item <sup>1</sup> |            |             |             | Codes for foods from MCW and USDA and the fraction (%) assigned to each code <sup>2</sup> |            |        |            |        |            |        |            |        |            |        |            |        |            |        |            |        |            |         |             |         |
|-------------------------------|------------------------------------------|------------|-------------|-------------|-------------------------------------------------------------------------------------------|------------|--------|------------|--------|------------|--------|------------|--------|------------|--------|------------|--------|------------|--------|------------|--------|------------|---------|-------------|---------|
|                               | Total fat                                | Total SFAs | Total MUFAs | Total PUFAs | Code 1                                                                                    | Fraction 1 | Code 2 | Fraction 2 | Code 3 | Fraction 3 | Code 4 | Fraction 4 | Code 5 | Fraction 5 | Code 6 | Fraction 6 | Code 7 | Fraction 7 | Code 8 | Fraction 8 | Code 9 | Fraction 9 | Code 10 | Fraction 10 | Code 11 |
| brdlbp_s_soya_fat_thick       | 59.20                                    | 13.21      | 17.70       | 25.17       | 12-503                                                                                    | 100        |        |            |        |            |        |            |        |            |        |            |        |            |        |            |        |            |         |             |         |
| brdlbp_s_soya_fat_thin        | 59.20                                    | 13.21      | 17.70       | 25.17       | 12-503                                                                                    | 100        |        |            |        |            |        |            |        |            |        |            |        |            |        |            |        |            |         |             |         |
| brdlbp_s_soya_lowfat_med      | 36.90                                    | 8.55       | 11.50       | 14.96       | 12-499                                                                                    | 100        |        |            |        |            |        |            |        |            |        |            |        |            |        |            |        |            |         |             |         |
| brdlbp_s_soya_lowfat_thick    | 36.90                                    | 8.55       | 11.50       | 14.96       | 12-499                                                                                    | 100        |        |            |        |            |        |            |        |            |        |            |        |            |        |            |        |            |         |             |         |
| brdlbp_s_soya_lowfat_thin     | 36.90                                    | 8.55       | 11.50       | 14.96       | 12-499                                                                                    | 100        |        |            |        |            |        |            |        |            |        |            |        |            |        |            |        |            |         |             |         |
| brdlbp_s_soya_vlowfat_med     | 36.90                                    | 8.55       | 11.50       | 14.96       | 12-499                                                                                    | 100        |        |            |        |            |        |            |        |            |        |            |        |            |        |            |        |            |         |             |         |
| brdlbp_s_soya_vlowfat_thick   | 36.90                                    | 8.55       | 11.50       | 14.96       | 12-499                                                                                    | 100        |        |            |        |            |        |            |        |            |        |            |        |            |        |            |        |            |         |             |         |
| brdlbp_s_soya_vlowfat_thin    | 36.90                                    | 8.55       | 11.50       | 14.96       | 12-499                                                                                    | 100        |        |            |        |            |        |            |        |            |        |            |        |            |        |            |        |            |         |             |         |
| brdoth_s_butter_dunno_med     | 80.65                                    | 43.12      | 25.23       | 6.42        | 17-655                                                                                    | 50         | 17-685 | 25         | 17-661 | 25         |        |            |        |            |        |            |        |            |        |            |        |            |         |             |         |
| brdoth_s_butter_dunno_thick   | 80.65                                    | 43.12      | 25.23       | 6.42        | 17-655                                                                                    | 50         | 17-685 | 25         | 17-661 | 25         |        |            |        |            |        |            |        |            |        |            |        |            |         |             |         |
| brdoth_s_butter_dunno_thin    | 80.65                                    | 43.12      | 25.23       | 6.42        | 17-655                                                                                    | 50         | 17-685 | 25         | 17-661 | 25         |        |            |        |            |        |            |        |            |        |            |        |            |         |             |         |
| brdoth_s_butter_fat_med       | 82.20                                    | 52.09      | 20.91       | 2.83        | 17-685                                                                                    | 50         | 17-661 | 50         |        |            |        |            |        |            |        |            |        |            |        |            |        |            |         |             |         |
| brdoth_s_butter_fat_thick     | 82.20                                    | 52.09      | 20.91       | 2.83        | 17-685                                                                                    | 50         | 17-661 | 50         |        |            |        |            |        |            |        |            |        |            |        |            |        |            |         |             |         |
| brdoth_s_butter_fat_thin      | 82.20                                    | 52.09      | 20.91       | 2.83        | 17-685                                                                                    | 50         | 17-661 | 50         |        |            |        |            |        |            |        |            |        |            |        |            |        |            |         |             |         |
| brdoth_s_butter_lowfat_med    | 60.20                                    | 25.70      | 22.66       | 7.75        | 17-656                                                                                    | 100        |        |            |        |            |        |            |        |            |        |            |        |            |        |            |        |            |         |             |         |
| brdoth_s_butter_lowfat_thick  | 60.20                                    | 25.70      | 22.66       | 7.75        | 17-656                                                                                    | 100        |        |            |        |            |        |            |        |            |        |            |        |            |        |            |        |            |         |             |         |
| brdoth_s_butter_lowfat_thin   | 60.20                                    | 25.70      | 22.66       | 7.75        | 17-656                                                                                    | 100        |        |            |        |            |        |            |        |            |        |            |        |            |        |            |        |            |         |             |         |
| brdoth_s_buttspr_fat_med      | 79.10                                    | 34.15      | 29.54       | 10.00       | 17-655                                                                                    | 100        |        |            |        |            |        |            |        |            |        |            |        |            |        |            |        |            |         |             |         |
| brdoth_s_buttspr_fat_thick    | 79.10                                    | 34.15      | 29.54       | 10.00       | 17-655                                                                                    | 100        |        |            |        |            |        |            |        |            |        |            |        |            |        |            |        |            |         |             |         |
| brdoth_s_buttspr_fat_thin     | 79.10                                    | 34.15      | 29.54       | 10.00       | 17-655                                                                                    | 100        |        |            |        |            |        |            |        |            |        |            |        |            |        |            |        |            |         |             |         |
| brdoth_s_buttspr_lowfat_med   | 60.20                                    | 25.70      | 22.66       | 7.75        | 17-656                                                                                    | 100        |        |            |        |            |        |            |        |            |        |            |        |            |        |            |        |            |         |             |         |
| brdoth_s_buttspr_lowfat_thick | 60.20                                    | 25.70      | 22.66       | 7.75        | 17-656                                                                                    | 100        |        |            |        |            |        |            |        |            |        |            |        |            |        |            |        |            |         |             |         |
| brdoth_s_buttspr_lowfat_thin  | 60.20                                    | 25.70      | 22.66       | 7.75        | 17-656                                                                                    | 100        |        |            |        |            |        |            |        |            |        |            |        |            |        |            |        |            |         |             |         |
| brdoth_s_dairy_chol_med       | 39.00                                    | 9.76       | 17.39       | 9.82        | 12-497                                                                                    | 100        |        |            |        |            |        |            |        |            |        |            |        |            |        |            |        |            |         |             |         |
| brdoth_s_dairy_chol_thick     | 39.00                                    | 9.76       | 17.39       | 9.82        | 12-497                                                                                    | 100        |        |            |        |            |        |            |        |            |        |            |        |            |        |            |        |            |         |             |         |
| brdoth_s_dairy_chol_thin      | 39.00                                    | 9.76       | 17.39       | 9.82        | 12-497                                                                                    | 100        |        |            |        |            |        |            |        |            |        |            |        |            |        |            |        |            |         |             |         |
| brdoth_s_dairy_dunno_med      | 49.80                                    | 12.69      | 23.67       | 10.86       | 12-497                                                                                    | 50         | 12-504 | 50         |        |            |        |            |        |            |        |            |        |            |        |            |        |            |         |             |         |
| brdoth_s_dairy_dunno_thick    | 49.80                                    | 12.69      | 23.67       | 10.86       | 12-497                                                                                    | 50         | 12-504 | 50         |        |            |        |            |        |            |        |            |        |            |        |            |        |            |         |             |         |
| brdoth_s_dairy_dunno_thin     | 49.80                                    | 12.69      | 23.67       | 10.86       | 12-497                                                                                    | 50         | 12-504 | 50         |        |            |        |            |        |            |        |            |        |            |        |            |        |            |         |             |         |
| brdoth_s_dairy_fat_med        | 60.60                                    | 15.61      | 29.95       | 11.90       | 12-504                                                                                    | 100        |        |            |        |            |        |            |        |            |        |            |        |            |        |            |        |            |         |             |         |
| brdoth_s_dairy_fat_thick      | 60.60                                    | 15.61      | 29.95       | 11.90       | 12-504                                                                                    | 100        |        |            |        |            |        |            |        |            |        |            |        |            |        |            |        |            |         |             |         |
| brdoth_s_dairy_fat_thin       | 60.60                                    | 15.61      | 29.95       | 11.90       | 12-504                                                                                    | 100        |        |            |        |            |        |            |        |            |        |            |        |            |        |            |        |            |         |             |         |
| brdoth_s_dairy_lowfat_med     | 39.00                                    | 9.76       | 17.39       | 9.82        | 12-497                                                                                    | 100        |        |            |        |            |        |            |        |            |        |            |        |            |        |            |        |            |         |             |         |
| brdoth_s_dairy_lowfat_thick   | 39.00                                    | 9.76       | 17.39       | 9.82        | 12-497                                                                                    | 100        |        |            |        |            |        |            |        |            |        |            |        |            |        |            |        |            |         |             |         |
| brdoth_s_dairy_lowfat_thin    | 39.00                                    | 9.76       | 17.39       | 9.82        | 12-497                                                                                    | 100        |        |            |        |            |        |            |        |            |        |            |        |            |        |            |        |            |         |             |         |
| brdoth_s_dairy_vlowfat_med    | 39.00                                    | 9.76       | 17.39       | 9.82        | 12-497                                                                                    | 100        |        |            |        |            |        |            |        |            |        |            |        |            |        |            |        |            |         |             |         |
| brdoth_s_dairy_vlowfat_thick  | 39.00                                    | 9.76       | 17.39       | 9.82        | 12-497                                                                                    | 100        |        |            |        |            |        |            |        |            |        |            |        |            |        |            |        |            |         |             |         |
| brdoth_s_dairy_vlowfat_thin   | 39.00                                    | 9.76       | 17.39       | 9.82        | 12-497                                                                                    | 100        |        |            |        |            |        |            |        |            |        |            |        |            |        |            |        |            |         |             |         |
| brdoth_s_dunno_chol_med       | 37.95                                    | 9.16       | 14.45       | 12.39       | 12-497                                                                                    | 50         | 12-499 | 50         |        |            |        |            |        |            |        |            |        |            |        |            |        |            |         |             |         |
| brdoth_s_dunno_chol_thick     | 37.95                                    | 9.16       | 14.45       | 12.39       | 12-497                                                                                    | 50         | 12-499 | 50         |        |            |        |            |        |            |        |            |        |            |        |            |        |            |         |             |         |
| brdoth_s_dunno_chol_thin      | 37.95                                    | 9.16       | 14.45       | 12.39       | 12-497                                                                                    | 50         | 12-499 | 50         |        |            |        |            |        |            |        |            |        |            |        |            |        |            |         |             |         |
| brdoth_s_dunno_dunno_med      | 48.93                                    | 11.78      | 19.14       | 15.46       | 12-497                                                                                    | 25         | 12-499 | 25         | 12-503 | 25         | 12-504 | 25         |        |            |        |            |        |            |        |            |        |            |         |             |         |
| brdoth_s_dunno_dunno_thick    | 48.93                                    | 11.78      | 19.14       | 15.46       | 12-497                                                                                    | 25         | 12-499 | 25         | 12-503 | 25         | 12-504 | 25         |        |            |        |            |        |            |        |            |        |            |         |             |         |
| brdoth_s_dunno_dunno_thin     | 48.93                                    | 11.78      | 19.14       | 15.46       | 12-497                                                                                    | 25         | 12-499 | 25         | 12-503 | 25         | 12-504 | 25         |        |            |        |            |        |            |        |            |        |            |         |             |         |
| brdoth_s_dunno_fat_med        | 59.90                                    | 14.41      | 23.83       | 18.54       | 12-503                                                                                    | 50         | 12-504 | 50         |        |            |        |            |        |            |        |            |        |            |        |            |        |            |         |             |         |
| brdoth_s_dunno_fat_thick      | 59.90                                    | 14.41      | 23.83       | 18.54       | 12-503                                                                                    | 50         | 12-504 | 50         |        |            |        |            |        |            |        |            |        |            |        |            |        |            |         |             |         |
| brdoth_s_dunno_fat_thin       | 59.90                                    | 14.41      | 23.83       | 18.54       | 12-503                                                                                    | 50         | 12-504 | 50         |        |            |        |            |        |            |        |            |        |            |        |            |        |            |         |             |         |
| brdoth_s_dunno_lowfat_med     | 37.95                                    | 9.16       | 14.45       | 12.39       | 12-497                                                                                    | 50         | 12-499 | 50         |        |            |        |            |        |            |        |            |        |            |        |            |        |            |         |             |         |
| brdoth_s_dunno_lowfat_thick   | 37.95                                    | 9.16       | 14.45       | 12.39       | 12-497                                                                                    | 50         | 12-499 | 50         |        |            |        |            |        |            |        |            |        |            |        |            |        |            |         |             |         |
| brdoth_s_dunno_lowfat_thin    | 37.95                                    | 9.16       | 14.45       | 12.39       | 12-497                                                                                    | 50         | 12-499 | 50         |        |            |        |            |        |            |        |            |        |            |        |            |        |            |         |             |         |
| brdoth_s_dunno_vlowfat_med    | 37.95                                    | 9.16       | 14.45       | 12.39       | 12-497                                                                                    | 50         | 12-499 | 50         |        |            |        |            |        |            |        |            |        |            |        |            |        |            |         |             |         |
| brdoth_s_dunno_vlowfat_thick  | 37.95                                    | 9.16       | 14.45       | 12.39       | 12-497                                                                                    | 50         | 12-499 | 50         |        |            |        |            |        |            |        |            |        |            |        |            |        |            |         |             |         |
| brdoth_s_dunno_vlowfat_thin   | 37.95                                    | 9.16       | 14.45       | 12.39       | 12-497                                                                                    | 50         | 12-499 | 50         |        |            |        |            |        |            |        |            |        |            |        |            |        |            |         |             |         |
| brdoth_s_hardmarg_med         | 76.40                                    | 26.41      | 34.00       | 12.21       | 12-500                                                                                    | 100        |        |            |        |            |        |            |        |            |        |            |        |            |        |            |        |            |         |             |         |
| brdoth_s_hardmarg_thick       | 76.40                                    | 26.41      | 34.00       | 12.21       | 12-500                                                                                    | 100        |        |            |        |            |        |            |        |            |        |            |        |            |        |            |        |            |         |             |         |
| brdoth_s_hardmarg_thin        | 76.40                                    | 26.41      | 34.00       | 12.21       | 12-500                                                                                    | 100        |        |            |        |            |        |            |        |            |        |            |        |            |        |            |        |            |         |             |         |
| brdoth_s_olive_chol_med       | 38.90                                    | 8.90       | 21.68       | 6.36        | 12-498                                                                                    | 100        |        |            |        |            |        |            |        |            |        |            |        |            |        |            |        |            |         |             |         |
| brdoth_s_olive_chol_thick     | 38.90                                    | 8.90       | 21.68       | 6.36        | 12-498                                                                                    | 100        |        |            |        |            |        |            |        |            |        |            |        |            |        |            |        |            |         |             |         |
| brdoth_s_olive_chol_thin      | 38.90                                    | 8.90       | 21.68       | 6.36        | 12-498                                                                                    | 100        |        |            |        |            |        |            |        |            |        |            |        |            |        |            |        |            |         |             |         |
| brdoth_s_olive_dunno_med      | 49.00                                    | 11.06      | 26.53       | 8.95        | 12-498                                                                                    | 50         | 12-505 | 50         |        |            |        |            |        |            |        |            |        |            |        |            |        |            |         |             |         |
| brdoth_s_olive_dunno_thick    | 49.00                                    | 11.06      | 26.53       | 8.95        | 12-498                                                                                    | 50         | 12-505 | 50         |        |            |        |            |        |            |        |            |        |            |        |            |        |            |         |             |         |
| brdoth_s_olive_dunno_thin     | 49.00                                    | 11.06      | 26.53       | 8.95        | 12-498                                                                                    | 50         | 12-505 | 50         |        |            |        |            |        |            |        |            |        |            |        |            |        |            |         |             |         |
| brdoth_s_olive_fat_med        | 59.10                                    | 13.22      | 31.37       | 11.53       | 12-505                                                                                    | 100        |        |            |        |            |        |            |        |            |        |            |        |            |        |            |        |            |         |             |         |
| brdoth_s_olive_fat_thick      | 59.10                                    | 13.22      | 31.37       | 11.53       | 12-505                                                                                    | 100        |        |            |        |            |        |            |        |            |        |            |        |            |        |            |        |            |         |             |         |
| brdoth_s_olive_fat_thin       | 59.10                                    | 13.22      | 31.37       | 11.53       | 12-505                                                                                    | 100        |        |            |        |            |        |            |        |            |        |            |        |            |        |            |        |            |         |             |         |
| brdoth_s_olive_lowfat_med     | 38.90                                    | 8.90       | 21.68       | 6.36        | 12-498                                                                                    | 100        |        |            |        |            |        |            |        |            |        |            |        |            |        |            |        |            |         |             |         |
| brdoth_s_olive_lowfat_thick   | 38.90                                    | 8.90       | 21.68       | 6.36        | 12-498                                                                                    | 100        |        |            |        |            |        |            |        |            |        |            |        |            |        |            |        |            |         |             |         |
| brdoth_s_olive_lowfat_thin    | 38.90                                    | 8.90       | 21.68       | 6.36        | 12-498                                                                                    | 100        |        |            |        |            |        |            |        |            |        |            |        |            |        |            |        |            |         |             |         |
| brdoth_s_olive_vlowfat_med    | 38.90                                    | 8.90       | 21.68       | 6.36        | 12-498                                                                                    | 100        |        |            |        |            |        |            |        |            |        |            |        |            |        |            |        |            |         |             |         |
| brdoth_s_olive_vlowfat_thick  | 38.90                                    | 8.90       | 21.68       | 6.36        | 12-498                                                                                    | 100        |        |            |        |            |        |            |        |            |        |            |        |            |        |            |        |            |         |             |         |
| brdoth_s_olive_vlowfat_thin   | 38.90                                    | 8.90       | 21.68       | 6.36        | 12-498                                                                                    | 100        |        |            |        |            |        |            |        |            |        |            |        |            |        |            |        |            |         |             |         |
| brdoth_s_other_med            | 68.67                                    | 33.71      | 21.43       | 9.30        | 81204000                                                                                  | 18         | 17-685 | 16         | 17-661 | 16         | 12-499 | 12.5       | 12-503 | 12.5       | 12-497 | 12.5       | 12-504 | 12.5       |        |            |        |            |         |             |         |
| brdoth_s_other_thick          | 68.67                                    | 33.71      | 21.43       | 9.30        | 81204000                                                                                  | 18         | 17-685 | 16         | 17-661 | 16         | 12-499 | 12.5       | 12-503 | 12.5       | 12-497 | 12.5       | 12-504 | 12.5       |        |            |        |            |         |             |         |
| brdoth_s_other_thin           | 68.67                                    | 33.71      | 21.43       | 9.30        | 81204000                                                                                  | 18         | 17-685 | 16         | 17-661 | 16         | 12-499 | 12.5       | 12-503 | 12.5       | 12-497 | 12.5       | 12-504 |            |        |            |        |            |         |             |         |

**Table S1.** Individual FA and major nutrient calculation in the individual FA dataset (MCW + USDA). USDA food codes are highlighted in red.

[illegible]

**Table S1.** Individual FA and major nutrient calculation in the individual FA dataset (MCW + USDA). USDA food codes are highlighted in red.

[illegible]



Table S1. Individual FA and major nutrient calculation in the individual FA dataset (MCW + USDA). USDA food codes are highlighted in red.

| Food item                    | Grams per 100g of food item <sup>1</sup> |            |             |             | Codes for foods from MCW and USDA and the fraction (%) assigned to each code <sup>2</sup> |            |        |            |        |            |        |            |        |            |        |            |        |            |        |            |        |            |         |             |         |
|------------------------------|------------------------------------------|------------|-------------|-------------|-------------------------------------------------------------------------------------------|------------|--------|------------|--------|------------|--------|------------|--------|------------|--------|------------|--------|------------|--------|------------|--------|------------|---------|-------------|---------|
|                              | Total fat                                | Total SFAs | Total MUFAs | Total PUFAs | Code 1                                                                                    | Fraction 1 | Code 2 | Fraction 2 | Code 3 | Fraction 3 | Code 4 | Fraction 4 | Code 5 | Fraction 5 | Code 6 | Fraction 6 | Code 7 | Fraction 7 | Code 8 | Fraction 8 | Code 9 | Fraction 9 | Code 10 | Fraction 10 | Code 11 |
| brdqli_s_dairy_lowfat_thick  | 39.00                                    | 9.76       | 17.39       | 9.82        | 12-497                                                                                    | 100        |        |            |        |            |        |            |        |            |        |            |        |            |        |            |        |            |         |             |         |
| brdqli_s_dairy_lowfat_thin   | 39.00                                    | 9.76       | 17.39       | 9.82        | 12-497                                                                                    | 100        |        |            |        |            |        |            |        |            |        |            |        |            |        |            |        |            |         |             |         |
| brdqli_s_dairy_vlowfat_med   | 39.00                                    | 9.76       | 17.39       | 9.82        | 12-497                                                                                    | 100        |        |            |        |            |        |            |        |            |        |            |        |            |        |            |        |            |         |             |         |
| brdqli_s_dairy_vlowfat_thick | 39.00                                    | 9.76       | 17.39       | 9.82        | 12-497                                                                                    | 100        |        |            |        |            |        |            |        |            |        |            |        |            |        |            |        |            |         |             |         |
| brdqli_s_dairy_vlowfat_thin  | 39.00                                    | 9.76       | 17.39       | 9.82        | 12-497                                                                                    | 100        |        |            |        |            |        |            |        |            |        |            |        |            |        |            |        |            |         |             |         |
| brdqli_s_dunno_chol_med      | 37.95                                    | 9.16       | 14.45       | 12.39       | 12-497                                                                                    | 50         | 12-499 | 50         |        |            |        |            |        |            |        |            |        |            |        |            |        |            |         |             |         |
| brdqli_s_dunno_chol_thick    | 37.95                                    | 9.16       | 14.45       | 12.39       | 12-497                                                                                    | 50         | 12-499 | 50         |        |            |        |            |        |            |        |            |        |            |        |            |        |            |         |             |         |
| brdqli_s_dunno_chol_thin     | 37.95                                    | 9.16       | 14.45       | 12.39       | 12-497                                                                                    | 50         | 12-499 | 50         |        |            |        |            |        |            |        |            |        |            |        |            |        |            |         |             |         |
| brdqli_s_dunno_dunno_med     | 48.93                                    | 11.78      | 19.14       | 15.46       | 12-497                                                                                    | 25         | 12-499 | 25         | 12-503 | 25         | 12-504 | 25         |        |            |        |            |        |            |        |            |        |            |         |             |         |
| brdqli_s_dunno_dunno_thick   | 48.93                                    | 11.78      | 19.14       | 15.46       | 12-497                                                                                    | 25         | 12-499 | 25         | 12-503 | 25         | 12-504 | 25         |        |            |        |            |        |            |        |            |        |            |         |             |         |
| brdqli_s_dunno_dunno_thin    | 48.93                                    | 11.78      | 19.14       | 15.46       | 12-497                                                                                    | 25         | 12-499 | 25         | 12-503 | 25         | 12-504 | 25         |        |            |        |            |        |            |        |            |        |            |         |             |         |
| brdqli_s_dunno_fat_med       | 59.90                                    | 14.41      | 23.83       | 18.54       | 12-503                                                                                    | 50         | 12-504 | 50         |        |            |        |            |        |            |        |            |        |            |        |            |        |            |         |             |         |
| brdqli_s_dunno_fat_thick     | 59.90                                    | 14.41      | 23.83       | 18.54       | 12-503                                                                                    | 50         | 12-504 | 50         |        |            |        |            |        |            |        |            |        |            |        |            |        |            |         |             |         |
| brdqli_s_dunno_fat_thin      | 59.90                                    | 14.41      | 23.83       | 18.54       | 12-503                                                                                    | 50         | 12-504 | 50         |        |            |        |            |        |            |        |            |        |            |        |            |        |            |         |             |         |
| brdqli_s_dunno_lowfat_med    | 37.95                                    | 9.16       | 14.45       | 12.39       | 12-497                                                                                    | 50         | 12-499 | 50         |        |            |        |            |        |            |        |            |        |            |        |            |        |            |         |             |         |
| brdqli_s_dunno_lowfat_thick  | 37.95                                    | 9.16       | 14.45       | 12.39       | 12-497                                                                                    | 50         | 12-499 | 50         |        |            |        |            |        |            |        |            |        |            |        |            |        |            |         |             |         |
| brdqli_s_dunno_lowfat_thin   | 37.95                                    | 9.16       | 14.45       | 12.39       | 12-497                                                                                    | 50         | 12-499 | 50         |        |            |        |            |        |            |        |            |        |            |        |            |        |            |         |             |         |
| brdqli_s_dunno_vlowfat_med   | 37.95                                    | 9.16       | 14.45       | 12.39       | 12-497                                                                                    | 50         | 12-499 | 50         |        |            |        |            |        |            |        |            |        |            |        |            |        |            |         |             |         |
| brdqli_s_dunno_vlowfat_thick | 37.95                                    | 9.16       | 14.45       | 12.39       | 12-497                                                                                    | 50         | 12-499 | 50         |        |            |        |            |        |            |        |            |        |            |        |            |        |            |         |             |         |
| brdqli_s_dunno_vlowfat_thin  | 37.95                                    | 9.16       | 14.45       | 12.39       | 12-497                                                                                    | 50         | 12-499 | 50         |        |            |        |            |        |            |        |            |        |            |        |            |        |            |         |             |         |
| brdqli_s_hardmarg_med        | 76.40                                    | 26.41      | 34.00       | 12.21       | 12-500                                                                                    | 100        |        |            |        |            |        |            |        |            |        |            |        |            |        |            |        |            |         |             |         |
| brdqli_s_hardmarg_thick      | 76.40                                    | 26.41      | 34.00       | 12.21       | 12-500                                                                                    | 100        |        |            |        |            |        |            |        |            |        |            |        |            |        |            |        |            |         |             |         |
| brdqli_s_hardmarg_thin       | 76.40                                    | 26.41      | 34.00       | 12.21       | 12-500                                                                                    | 100        |        |            |        |            |        |            |        |            |        |            |        |            |        |            |        |            |         |             |         |
| brdqli_s_olive_chol_med      | 38.90                                    | 8.90       | 21.68       | 6.36        | 12-498                                                                                    | 100        |        |            |        |            |        |            |        |            |        |            |        |            |        |            |        |            |         |             |         |
| brdqli_s_olive_chol_thick    | 38.90                                    | 8.90       | 21.68       | 6.36        | 12-498                                                                                    | 100        |        |            |        |            |        |            |        |            |        |            |        |            |        |            |        |            |         |             |         |
| brdqli_s_olive_chol_thin     | 38.90                                    | 8.90       | 21.68       | 6.36        | 12-498                                                                                    | 100        |        |            |        |            |        |            |        |            |        |            |        |            |        |            |        |            |         |             |         |
| brdqli_s_olive_dunno_med     | 49.00                                    | 11.06      | 26.53       | 8.95        | 12-498                                                                                    | 50         | 12-505 | 50         |        |            |        |            |        |            |        |            |        |            |        |            |        |            |         |             |         |
| brdqli_s_olive_dunno_thick   | 49.00                                    | 11.06      | 26.53       | 8.95        | 12-498                                                                                    | 50         | 12-505 | 50         |        |            |        |            |        |            |        |            |        |            |        |            |        |            |         |             |         |
| brdqli_s_olive_dunno_thin    | 49.00                                    | 11.06      | 26.53       | 8.95        | 12-498                                                                                    | 50         | 12-505 | 50         |        |            |        |            |        |            |        |            |        |            |        |            |        |            |         |             |         |
| brdqli_s_olive_fat_med       | 59.10                                    | 13.22      | 31.37       | 11.53       | 12-505                                                                                    | 100        |        |            |        |            |        |            |        |            |        |            |        |            |        |            |        |            |         |             |         |
| brdqli_s_olive_fat_thick     | 59.10                                    | 13.22      | 31.37       | 11.53       | 12-505                                                                                    | 100        |        |            |        |            |        |            |        |            |        |            |        |            |        |            |        |            |         |             |         |
| brdqli_s_olive_fat_thin      | 59.10                                    | 13.22      | 31.37       | 11.53       | 12-505                                                                                    | 100        |        |            |        |            |        |            |        |            |        |            |        |            |        |            |        |            |         |             |         |
| brdqli_s_olive_lowfat_med    | 38.90                                    | 8.90       | 21.68       | 6.36        | 12-498                                                                                    | 100        |        |            |        |            |        |            |        |            |        |            |        |            |        |            |        |            |         |             |         |
| brdqli_s_olive_lowfat_thick  | 38.90                                    | 8.90       | 21.68       | 6.36        | 12-498                                                                                    | 100        |        |            |        |            |        |            |        |            |        |            |        |            |        |            |        |            |         |             |         |
| brdqli_s_olive_lowfat_thin   | 38.90                                    | 8.90       | 21.68       | 6.36        | 12-498                                                                                    | 100        |        |            |        |            |        |            |        |            |        |            |        |            |        |            |        |            |         |             |         |
| brdqli_s_olive_vlowfat_med   | 38.90                                    | 8.90       | 21.68       | 6.36        | 12-498                                                                                    | 100        |        |            |        |            |        |            |        |            |        |            |        |            |        |            |        |            |         |             |         |
| brdqli_s_olive_vlowfat_thick | 38.90                                    | 8.90       | 21.68       | 6.36        | 12-498                                                                                    | 100        |        |            |        |            |        |            |        |            |        |            |        |            |        |            |        |            |         |             |         |
| brdqli_s_olive_vlowfat_thin  | 38.90                                    | 8.90       | 21.68       | 6.36        | 12-498                                                                                    | 100        |        |            |        |            |        |            |        |            |        |            |        |            |        |            |        |            |         |             |         |
| brdqli_s_other_med           | 68.67                                    | 33.71      | 21.43       | 9.30        | 81204000                                                                                  | 18         | 17-685 | 16         | 17-661 | 16         | 12-499 | 12.5       | 12-503 | 12.5       | 12-497 | 12.5       | 12-504 | 12.5       |        |            |        |            |         |             |         |
| brdqli_s_other_thick         | 68.67                                    | 33.71      | 21.43       | 9.30        | 81204000                                                                                  | 18         | 17-685 | 16         | 17-661 | 16         | 12-499 | 12.5       | 12-503 | 12.5       | 12-497 | 12.5       | 12-504 | 12.5       |        |            |        |            |         |             |         |
| brdqli_s_other_thin          | 68.67                                    | 33.71      | 21.43       | 9.30        | 81204000                                                                                  | 18         | 17-685 | 16         | 17-661 | 16         | 12-499 | 12.5       | 12-503 | 12.5       | 12-497 | 12.5       | 12-504 | 12.5       |        |            |        |            |         |             |         |
| brdqli_s_poly_chol_med       | 36.90                                    | 8.55       | 11.50       | 14.96       | 12-499                                                                                    | 100        |        |            |        |            |        |            |        |            |        |            |        |            |        |            |        |            |         |             |         |
| brdqli_s_poly_chol_thick     | 36.90                                    | 8.55       | 11.50       | 14.96       | 12-499                                                                                    | 100        |        |            |        |            |        |            |        |            |        |            |        |            |        |            |        |            |         |             |         |
| brdqli_s_poly_chol_thin      | 36.90                                    | 8.55       | 11.50       | 14.96       | 12-499                                                                                    | 100        |        |            |        |            |        |            |        |            |        |            |        |            |        |            |        |            |         |             |         |
| brdqli_s_poly_dunno_med      | 48.05                                    | 10.88      | 14.60       | 20.07       | 12-499                                                                                    | 50         | 12-503 | 50         |        |            |        |            |        |            |        |            |        |            |        |            |        |            |         |             |         |
| brdqli_s_poly_dunno_thick    | 48.05                                    | 10.88      | 14.60       | 20.07       | 12-499                                                                                    | 50         | 12-503 | 50         |        |            |        |            |        |            |        |            |        |            |        |            |        |            |         |             |         |
| brdqli_s_poly_dunno_thin     | 48.05                                    | 10.88      | 14.60       | 20.07       | 12-499                                                                                    | 50         | 12-503 | 50         |        |            |        |            |        |            |        |            |        |            |        |            |        |            |         |             |         |
| brdqli_s_poly_fat_med        | 59.20                                    | 13.21      | 17.70       | 25.17       | 12-503                                                                                    | 100        |        |            |        |            |        |            |        |            |        |            |        |            |        |            |        |            |         |             |         |
| brdqli_s_poly_fat_thick      | 59.20                                    | 13.21      | 17.70       | 25.17       | 12-503                                                                                    | 100        |        |            |        |            |        |            |        |            |        |            |        |            |        |            |        |            |         |             |         |
| brdqli_s_poly_fat_thin       | 59.20                                    | 13.21      | 17.70       | 25.17       | 12-503                                                                                    | 100        |        |            |        |            |        |            |        |            |        |            |        |            |        |            |        |            |         |             |         |
| brdqli_s_poly_lowfat_med     | 36.90                                    | 8.55       | 11.50       | 14.96       | 12-499                                                                                    | 100        |        |            |        |            |        |            |        |            |        |            |        |            |        |            |        |            |         |             |         |
| brdqli_s_poly_lowfat_thick   | 36.90                                    | 8.55       | 11.50       | 14.96       | 12-499                                                                                    | 100        |        |            |        |            |        |            |        |            |        |            |        |            |        |            |        |            |         |             |         |
| brdqli_s_poly_lowfat_thin    | 36.90                                    | 8.55       | 11.50       | 14.96       | 12-499                                                                                    | 100        |        |            |        |            |        |            |        |            |        |            |        |            |        |            |        |            |         |             |         |
| brdqli_s_poly_vlowfat_med    | 36.90                                    | 8.55       | 11.50       | 14.96       | 12-499                                                                                    | 100        |        |            |        |            |        |            |        |            |        |            |        |            |        |            |        |            |         |             |         |
| brdqli_s_poly_vlowfat_thick  | 36.90                                    | 8.55       | 11.50       | 14.96       | 12-499                                                                                    | 100        |        |            |        |            |        |            |        |            |        |            |        |            |        |            |        |            |         |             |         |
| brdqli_s_poly_vlowfat_thin   | 36.90                                    | 8.55       | 11.50       | 14.96       | 12-499                                                                                    | 100        |        |            |        |            |        |            |        |            |        |            |        |            |        |            |        |            |         |             |         |
| brdqli_s_soya_chol_med       | 36.90                                    | 8.55       | 11.50       | 14.96       | 12-499                                                                                    | 100        |        |            |        |            |        |            |        |            |        |            |        |            |        |            |        |            |         |             |         |
| brdqli_s_soya_chol_thick     | 36.90                                    | 8.55       | 11.50       | 14.96       | 12-499                                                                                    | 100        |        |            |        |            |        |            |        |            |        |            |        |            |        |            |        |            |         |             |         |
| brdqli_s_soya_chol_thin      | 36.90                                    | 8.55       | 11.50       | 14.96       | 12-499                                                                                    | 100        |        |            |        |            |        |            |        |            |        |            |        |            |        |            |        |            |         |             |         |
| brdqli_s_soya_dunno_med      | 48.05                                    | 10.88      | 14.60       | 20.07       | 12-499                                                                                    | 50         | 12-503 | 50         |        |            |        |            |        |            |        |            |        |            |        |            |        |            |         |             |         |
| brdqli_s_soya_dunno_thick    | 48.05                                    | 10.88      | 14.60       | 20.07       | 12-499                                                                                    | 50         | 12-503 | 50         |        |            |        |            |        |            |        |            |        |            |        |            |        |            |         |             |         |
| brdqli_s_soya_dunno_thin     | 48.05                                    | 10.88      | 14.60       | 20.07       | 12-499                                                                                    | 50         | 12-503 | 50         |        |            |        |            |        |            |        |            |        |            |        |            |        |            |         |             |         |
| brdqli_s_soya_fat_med        | 59.20                                    | 13.21      | 17.70       | 25.17       | 12-503                                                                                    | 100        |        |            |        |            |        |            |        |            |        |            |        |            |        |            |        |            |         |             |         |
| brdqli_s_soya_fat_thick      | 59.20                                    | 13.21      | 17.70       | 25.17       | 12-503                                                                                    | 100        |        |            |        |            |        |            |        |            |        |            |        |            |        |            |        |            |         |             |         |
| brdqli_s_soya_fat_thin       | 59.20                                    | 13.21      | 17.70       | 25.17       | 12-503                                                                                    | 100        |        |            |        |            |        |            |        |            |        |            |        |            |        |            |        |            |         |             |         |
| brdqli_s_soya_lowfat_med     | 36.90                                    | 8.55       | 11.50       | 14.96       | 12-499                                                                                    | 100        |        |            |        |            |        |            |        |            |        |            |        |            |        |            |        |            |         |             |         |
| brdqli_s_soya_lowfat_thick   | 36.90                                    | 8.55       | 11.50       | 14.96       | 12-499                                                                                    | 100        |        |            |        |            |        |            |        |            |        |            |        |            |        |            |        |            |         |             |         |
| brdqli_s_soya_lowfat_thin    | 36.90                                    | 8.55       | 11.50       | 14.96       | 12-499                                                                                    | 100        |        |            |        |            |        |            |        |            |        |            |        |            |        |            |        |            |         |             |         |
| brdqli_s_soya_vlowfat_med    | 36.90                                    | 8.55       | 11.50       | 14.96       | 12-499                                                                                    | 100        |        |            |        |            |        |            |        |            |        |            |        |            |        |            |        |            |         |             |         |
| brdqli_s_soya_vlowfat_thick  | 36.90                                    | 8.55       | 11.50       | 14.96       | 12-499                                                                                    | 100        |        |            |        |            |        |            |        |            |        |            |        |            |        |            |        |            |         |             |         |
| brdqli_s_soya_vlowfat_thin   | 36.90                                    | 8.55       | 11.50       | 14.96       | 12-499                                                                                    | 100        |        |            |        |            |        |            |        |            |        |            |        |            |        |            |        |            |         |             |         |
| bread_baguette_gf_nonwhite   | 14.79                                    | 2.40       | 4.28        | 7.40        | 11-972                                                                                    | 15         | 11-971 | 15         | 11-969 | 15         | 11-981 | 15         | 11-975 | 15         | 14-844 | 8.4        | 14-845 | 8.3        | 13-849 | 8.3        |        |            |         |             |         |
| bread_baguette_gf_unanswered | 2.80                                     | 0.49       | 1.04        | 0.78        | 11-969                                                                                    | 33.4       | 11-981 | 33.3       | 11-971 | 33.3       |        |            |        |            |        |            |        |            |        |            |        |            |         |             |         |
| bread_baguette_gf_white      | 2.90                                     | 0.46       | 1.20        | 0.77        | 11-978                                                                                    | 50         | 11-969 | 50         |        |            |        |            |        |            |        |            |        |            |        |            |        |            |         |             |         |



Table S1. Individual FA and major nutrient calculation in the individual FA dataset (MCW + USDA). USDA food codes are highlighted in red.

| Food item                     | Grams per 100g of food item <sup>1</sup> |            |             |             | Codes for foods from MCW and USDA and the fraction (%) assigned to each code <sup>2</sup> |            |          |            |         |            |        |            |        |            |        |            |        |            |        |            |        |            |         |             |         |
|-------------------------------|------------------------------------------|------------|-------------|-------------|-------------------------------------------------------------------------------------------|------------|----------|------------|---------|------------|--------|------------|--------|------------|--------|------------|--------|------------|--------|------------|--------|------------|---------|-------------|---------|
|                               | Total fat                                | Total SFAs | Total MUFAs | Total PUFAs | Code 1                                                                                    | Fraction 1 | Code 2   | Fraction 2 | Code 3  | Fraction 3 | Code 4 | Fraction 4 | Code 5 | Fraction 5 | Code 6 | Fraction 6 | Code 7 | Fraction 7 | Code 8 | Fraction 8 | Code 9 | Fraction 9 | Code 10 | Fraction 10 | Code 11 |
| bread_baguette_other          | 3.35                                     | 0.56       | 1.49        | 0.85        | 11-975                                                                                    | 13.4       | 11-981   | 13.3       | 11-969  | 60         | 11-971 | 13.3       |        |            |        |            |        |            |        |            |        |            |         |             |         |
| bread_baguette_seeded         | 50.87                                    | 7.96       | 14.45       | 27.10       | 14-844                                                                                    | 33.4       | 14-845   | 33.3       | 13-849  | 33.3       |        |            |        |            |        |            |        |            |        |            |        |            |         |             |         |
| bread_baguette_unanswered     | 2.80                                     | 0.49       | 1.04        | 0.78        | 11-969                                                                                    | 33.4       | 11-981   | 33.3       | 11-971  | 33.3       |        |            |        |            |        |            |        |            |        |            |        |            |         |             |         |
| bread_baguette_white          | 2.90                                     | 0.46       | 1.20        | 0.77        | 11-978                                                                                    | 50         | 11-969   | 50         |         |            |        |            |        |            |        |            |        |            |        |            |        |            |         |             |         |
| bread_baguette_wholemeal      | 2.50                                     | 0.46       | 0.59        | 0.82        | 11-981                                                                                    | 100        |          |            |         |            |        |            |        |            |        |            |        |            |        |            |        |            |         |             |         |
| bread_crisp                   | 7.91                                     | 4.08       | 2.09        | 1.11        | 11-822                                                                                    | 40         | 11-820   | 30         | 11-826  | 30         |        |            |        |            |        |            |        |            |        |            |        |            |         |             |         |
| bread_crisp_gf                | 7.91                                     | 4.08       | 2.09        | 1.11        | 11-822                                                                                    | 40         | 11-820   | 30         | 11-826  | 30         |        |            |        |            |        |            |        |            |        |            |        |            |         |             |         |
| bread_garlic                  | 16.70                                    | 8.63       | 5.39        | 1.56        | 11-937                                                                                    | 100        |          |            |         |            |        |            |        |            |        |            |        |            |        |            |        |            |         |             |         |
| bread_large_bap_gf_nonwhite   | 14.60                                    | 2.41       | 4.05        | 7.39        | 11-972                                                                                    | 15         | 11-971   | 15         | 11-1006 | 15         | 11-981 | 15         | 11-975 | 15         | 14-844 | 8.4        | 14-845 | 8.3        | 13-849 | 8.3        |        |            |         |             |         |
| bread_large_bap_gf_unanswered | 2.37                                     | 0.50       | 0.54        | 0.76        | 11-1006                                                                                   | 33.4       | 11-971   | 33.3       | 11-981  | 33.3       |        |            |        |            |        |            |        |            |        |            |        |            |         |             |         |
| bread_large_bap_gf_white      | 2.40                                     | 0.57       | 0.54        | 0.77        | 11-985                                                                                    | 50         | 11-1006  | 50         |         |            |        |            |        |            |        |            |        |            |        |            |        |            |         |             |         |
| bread_large_bap_mixed         | 2.30                                     | 0.54       | 0.54        | 0.74        | 11-972                                                                                    | 33.4       | 11-971   | 33.3       | 11-1006 | 33.3       |        |            |        |            |        |            |        |            |        |            |        |            |         |             |         |
| bread_large_bap_other         | 2.57                                     | 0.59       | 0.58        | 0.83        | 11-975                                                                                    | 13.4       | 11-981   | 13.3       | 11-1006 | 60         | 11-971 | 13.3       |        |            |        |            |        |            |        |            |        |            |         |             |         |
| bread_large_bap_seeded        | 50.87                                    | 7.96       | 14.45       | 27.10       | 14-844                                                                                    | 33.4       | 14-845   | 33.3       | 13-849  | 33.3       |        |            |        |            |        |            |        |            |        |            |        |            |         |             |         |
| bread_large_bap_unanswered    | 2.37                                     | 0.50       | 0.54        | 0.76        | 11-1006                                                                                   | 33.4       | 11-971   | 33.3       | 11-981  | 33.3       |        |            |        |            |        |            |        |            |        |            |        |            |         |             |         |
| bread_large_bap_white         | 2.40                                     | 0.57       | 0.54        | 0.77        | 11-985                                                                                    | 50         | 11-1006  | 50         |         |            |        |            |        |            |        |            |        |            |        |            |        |            |         |             |         |
| bread_large_bap_wholemeal     | 2.50                                     | 0.46       | 0.59        | 0.82        | 11-981                                                                                    | 100        |          |            |         |            |        |            |        |            |        |            |        |            |        |            |        |            |         |             |         |
| bread_naam                    | 7.30                                     | 0.97       | 3.05        | 2.37        | 11-973                                                                                    | 100        |          |            |         |            |        |            |        |            |        |            |        |            |        |            |        |            |         |             |         |
| bread_other                   | 2.56                                     | 0.96       | 0.55        | 0.67        | 11-541                                                                                    | 80         | 11-826   | 10         | 11-462  | 10         |        |            |        |            |        |            |        |            |        |            |        |            |         |             |         |
| bread_other_gf                | 2.56                                     | 0.96       | 0.55        | 0.67        | 11-541                                                                                    | 80         | 11-826   | 10         | 11-462  | 10         |        |            |        |            |        |            |        |            |        |            |        |            |         |             |         |
| bread_roll_gf_nonwhite        | 14.60                                    | 2.41       | 4.05        | 7.39        | 11-972                                                                                    | 15         | 11-971   | 15         | 11-1006 | 15         | 11-981 | 15         | 11-975 | 15         | 14-844 | 8.4        | 14-845 | 8.3        | 13-849 | 8.3        |        |            |         |             |         |
| bread_roll_gf_unanswered      | 2.37                                     | 0.50       | 0.54        | 0.76        | 11-1006                                                                                   | 33.4       | 11-971   | 33.3       | 11-981  | 33.3       |        |            |        |            |        |            |        |            |        |            |        |            |         |             |         |
| bread_roll_gf_white           | 2.40                                     | 0.57       | 0.54        | 0.77        | 11-985                                                                                    | 50         | 11-1006  | 50         |         |            |        |            |        |            |        |            |        |            |        |            |        |            |         |             |         |
| bread_roll_mixed              | 2.30                                     | 0.54       | 0.54        | 0.74        | 11-972                                                                                    | 33.4       | 11-971   | 33.3       | 11-1006 | 33.3       |        |            |        |            |        |            |        |            |        |            |        |            |         |             |         |
| bread_roll_other              | 2.57                                     | 0.59       | 0.58        | 0.83        | 11-975                                                                                    | 13.4       | 11-981   | 13.3       | 11-1006 | 60         | 11-971 | 13.3       |        |            |        |            |        |            |        |            |        |            |         |             |         |
| bread_roll_seeded             | 50.87                                    | 7.96       | 14.45       | 27.10       | 14-844                                                                                    | 33.4       | 14-845   | 33.3       | 13-849  | 33.3       |        |            |        |            |        |            |        |            |        |            |        |            |         |             |         |
| bread_roll_unanswered         | 2.37                                     | 0.50       | 0.54        | 0.76        | 11-1006                                                                                   | 33.4       | 11-971   | 33.3       | 11-981  | 33.3       |        |            |        |            |        |            |        |            |        |            |        |            |         |             |         |
| bread_roll_white              | 2.40                                     | 0.57       | 0.54        | 0.77        | 11-985                                                                                    | 50         | 11-1006  | 50         |         |            |        |            |        |            |        |            |        |            |        |            |        |            |         |             |         |
| bread_roll_wholemeal          | 2.50                                     | 0.46       | 0.59        | 0.82        | 11-981                                                                                    | 100        |          |            |         |            |        |            |        |            |        |            |        |            |        |            |        |            |         |             |         |
| bread_sliced_gf_nonwhite      | 14.45                                    | 2.36       | 4.01        | 7.34        | 11-972                                                                                    | 15         | 11-971   | 15         | 11-980  | 15         | 11-975 | 15         | 11-981 | 15         | 14-844 | 8.4        | 14-845 | 8.3        | 13-849 | 8.3        |        |            |         |             |         |
| bread_sliced_gf_unanswered    | 2.03                                     | 0.39       | 0.45        | 0.66        | 11-980                                                                                    | 33.4       | 11-981   | 33.3       | 11-971  | 33.3       |        |            |        |            |        |            |        |            |        |            |        |            |         |             |         |
| bread_sliced_gf_white         | 1.60                                     | 0.29       | 0.32        | 0.52        | 11-980                                                                                    | 100        |          |            |         |            |        |            |        |            |        |            |        |            |        |            |        |            |         |             |         |
| bread_sliced_mixed            | 1.97                                     | 0.43       | 0.45        | 0.64        | 11-972                                                                                    | 33.4       | 11-971   | 33.3       | 11-980  | 33.3       |        |            |        |            |        |            |        |            |        |            |        |            |         |             |         |
| bread_sliced_other            | 2.30                                     | 0.48       | 0.51        | 0.76        | 11-975                                                                                    | 25         | 11-981   | 25         | 11-971  | 25         | 11-980 | 25         |        |            |        |            |        |            |        |            |        |            |         |             |         |
| bread_sliced_seeded           | 50.87                                    | 7.96       | 14.45       | 27.10       | 14-844                                                                                    | 33.4       | 14-845   | 33.3       | 13-849  | 33.3       |        |            |        |            |        |            |        |            |        |            |        |            |         |             |         |
| bread_sliced_unanswered       | 2.03                                     | 0.39       | 0.45        | 0.66        | 11-980                                                                                    | 33.4       | 11-981   | 33.3       | 11-971  | 33.3       |        |            |        |            |        |            |        |            |        |            |        |            |         |             |         |
| bread_sliced_wheat            | 1.60                                     | 0.29       | 0.32        | 0.52        | 11-980                                                                                    | 100        |          |            |         |            |        |            |        |            |        |            |        |            |        |            |        |            |         |             |         |
| bread_sliced_wholemeal        | 2.50                                     | 0.46       | 0.59        | 0.82        | 11-981                                                                                    | 100        |          |            |         |            |        |            |        |            |        |            |        |            |        |            |        |            |         |             |         |
| cake                          | 21.03                                    | 7.68       | 8.20        | 3.86        | 11-832                                                                                    | 20         | 11-814   | 20         | 11-836  | 20         | 11-799 | 6          | 14-318 | 5          | 12-335 | 5          | 17-063 | 1          | 12-324 | 2          | 17-661 | 1          | 11-737  | 20          |         |
| cake_gf                       | 21.03                                    | 7.68       | 8.20        | 3.86        | 11-832                                                                                    | 20         | 11-814   | 20         | 11-836  | 20         | 11-799 | 6          | 14-318 | 5          | 12-335 | 5          | 17-063 | 1          | 12-324 | 2          | 17-661 | 1          | 11-737  | 20          |         |
| cereal_bran                   | 3.10                                     | 0.48       | 0.39        | 1.64        | 11-763                                                                                    | 25         | 11-767   | 75         |         |            |        |            |        |            |        |            |        |            |        |            |        |            |         |             |         |
| cereal_bran_driedfruit        | 5.80                                     | 2.65       | 0.88        | 0.64        | 11-779                                                                                    | 100        |          |            |         |            |        |            |        |            |        |            |        |            |        |            |        |            |         |             |         |
| cereal_muesli                 | 6.30                                     | 1.27       | 2.97        | 1.68        | 11-780                                                                                    | 100        |          |            |         |            |        |            |        |            |        |            |        |            |        |            |        |            |         |             |         |
| cereal_muesli_driedfruit      | 5.71                                     | 1.14       | 2.67        | 1.51        | 11-780                                                                                    | 90         | 14-087   | 10         |         |            |        |            |        |            |        |            |        |            |        |            |        |            |         |             |         |
| cereal_oatcrunch              | 20.50                                    | 4.61       | 10.63       | 4.22        | 11-939                                                                                    | 100        |          |            |         |            |        |            |        |            |        |            |        |            |        |            |        |            |         |             |         |
| cereal_oatcrunch_driedfruit   | 18.49                                    | 4.15       | 9.57        | 3.80        | 11-939                                                                                    | 90         | 14-087   | 10         |         |            |        |            |        |            |        |            |        |            |        |            |        |            |         |             |         |
| cereal_other                  | 4.90                                     | 0.83       | 1.54        | 2.10        | 11-755                                                                                    | 20         | 11-767   | 40         | 11-792  | 40         |        |            |        |            |        |            |        |            |        |            |        |            |         |             |         |
| cereal_other_driedfruit       | 4.80                                     | 1.35       | 1.38        | 1.30        | 11-755                                                                                    | 15         | 11-779   | 32.5       | 11-792  | 32.5       | 14-087 | 20         |        |            |        |            |        |            |        |            |        |            |         |             |         |
| cereal_plain                  | 1.07                                     | 0.21       | 0.20        | 0.41        | 11-760                                                                                    | 33.4       | 11-742   | 16.7       | 11-742  | 16.6       | 11-750 | 16.7       | 11-750 | 16.6       |        |            |        |            |        |            |        |            |         |             |         |
| cereal_plain_driedfruit       | 0.85                                     | 0.14       | 0.14        | 0.28        | 11-760                                                                                    | 22.7       | 11-742   | 11.4       | 11-742  | 11.3       | 11-750 | 11.3       | 11-750 | 11.3       | 14-087 | 32         |        |            |        |            |        |            |         |             |         |
| cereal_sugar                  | 0.00                                     | 0.00       | 0.00        | 0.00        | 17-063                                                                                    | 33.4       | 17-050   | 33.3       | 17-065  | 33.3       |        |            |        |            |        |            |        |            |        |            |        |            |         |             |         |
| cereal_sweet                  | 2.30                                     | 0.67       | 1.03        | 0.48        | 11-754                                                                                    | 33.4       | 11-746   | 33.3       | 11-753  | 33.3       |        |            |        |            |        |            |        |            |        |            |        |            |         |             |         |
| cereal_sweet_driedfruit       | 2.11                                     | 0.61       | 0.92        | 0.43        | 11-754                                                                                    | 30.06      | 11-746   | 29.97      | 11-753  | 29.97      | 14-087 | 10         |        |            |        |            |        |            |        |            |        |            |         |             |         |
| cereal_wwheat                 | 2.23                                     | 0.31       | 0.31        | 0.97        | 11-775                                                                                    | 33.4       | 11-761   | 33.3       | 11-773  | 33.3       |        |            |        |            |        |            |        |            |        |            |        |            |         |             |         |
| cereal_wwheat_driedfruit      | 1.80                                     | 0.26       | 0.17        | 0.88        | 11-777                                                                                    | 50         | 11-773   | 50         |         |            |        |            |        |            |        |            |        |            |        |            |        |            |         |             |         |
| cerealbar                     | 14.12                                    | 5.91       | 5.69        | 1.80        | 11-819                                                                                    | 55         | 11-818   | 45         |         |            |        |            |        |            |        |            |        |            |        |            |        |            |         |             |         |
| cerealbar_gf                  | 14.12                                    | 5.91       | 5.69        | 1.80        | 11-819                                                                                    | 55         | 11-818   | 45         |         |            |        |            |        |            |        |            |        |            |        |            |        |            |         |             |         |
| cheese_blue                   | 33.88                                    | 21.65      | 9.04        | 1.35        | 12-354                                                                                    | 25         | 12-367   | 25         | 12-494  | 50         |        |            |        |            |        |            |        |            |        |            |        |            |         |             |         |
| cheese_cottage                | 3.56                                     | 1.42       | 0.64        | 0.10        | 14201010                                                                                  | 60         | 14204010 | 40         |         |            |        |            |        |            |        |            |        |            |        |            |        |            |         |             |         |
| cheese_feta                   | 20.30                                    | 13.75      | 5.04        | 0.76        | 12-360                                                                                    | 100        |          |            |         |            |        |            |        |            |        |            |        |            |        |            |        |            |         |             |         |
| cheese_goat                   | 25.80                                    | 17.91      | 6.09        | 1.04        | 12-357                                                                                    | 100        |          |            |         |            |        |            |        |            |        |            |        |            |        |            |        |            |         |             |         |
| cheese_hard                   | 33.86                                    | 21.19      | 9.08        | 1.10        | 12-346                                                                                    | 80         | 12-526   | 20         |         |            |        |            |        |            |        |            |        |            |        |            |        |            |         |             |         |
| cheese_hard_lof               | 14.10                                    | 8.85       | 4.13        | 0.41        | 14110120                                                                                  | 100        |          |            |         |            |        |            |        |            |        |            |        |            |        |            |        |            |         |             |         |
| cheese_mozzarella             | 20.30                                    | 13.75      | 5.04        | 0.76        | 12-360                                                                                    | 100        |          |            |         |            |        |            |        |            |        |            |        |            |        |            |        |            |         |             |         |
| cheese_other                  | 26.70                                    | 18.13      | 6.60        | 1.06        | 12-346                                                                                    | 20         | 12-496   | 40         | 12-357  | 40         |        |            |        |            |        |            |        |            |        |            |        |            |         |             |         |
| cheese_soft                   | 25.75                                    | 17.99      | 6.34        | 1.03        | 12-492                                                                                    | 50         | 12-357   | 50         |         |            |        |            |        |            |        |            |        |            |        |            |        |            |         |             |         |
| cheese_spread                 | 23.00                                    | 14.32      | 6.34        | 0.83        | 12-527                                                                                    | 100        |          |            |         |            |        |            |        |            |        |            |        |            |        |            |        |            |         |             |         |
| cheese_spread_lof             | 8.88                                     | 5.65       | 2.46        | 0.42        | 14110330                                                                                  | 100        |          |            |         |            |        |            |        |            |        |            |        |            |        |            |        |            |         |             |         |
| cheesecake                    | 12.30                                    | 7.54       | 3.49        | 0.51        | 12-542                                                                                    | 100        |          |            |         |            |        |            |        |            |        |            |        |            |        |            |        |            |         |             |         |
| cheesecake_gf                 | 12.30                                    | 7.54       | 3.49        | 0.51        | 12-542                                                                                    | 100        |          |            |         |            |        |            |        |            |        |            |        |            |        |            |        |            |         |             |         |
| choc_bar                      | 25.21                                    | 11.81      | 10.19       | 1.95        | 17-658                                                                                    | 34         | 17-670   | 33         | 11-740  | 33         |        |            |        |            |        |            |        |            |        |            |        |            |         |             |         |
| choc_dark                     | 28.00                                    | 16.80      | 9.00        | 1.00        | 17-491                                                                                    | 100        |          |            |         |            |        |            |        |            |        |            |        |            |        |            |        |            |         |             |         |



**Table S1.** Individual FA and major nutrient calculation in the individual FA dataset (MCW + USDA). USDA food codes are highlighted in red.

| Food item                   | Grams per 100g of food item <sup>1</sup> |            |             |             | Codes for foods from MCW and USDA and the fraction (%) assigned to each code <sup>2</sup> |            |          |            |          |            |        |            |        |            |          |            |        |            |        |            |        |            |         |             |         |             |
|-----------------------------|------------------------------------------|------------|-------------|-------------|-------------------------------------------------------------------------------------------|------------|----------|------------|----------|------------|--------|------------|--------|------------|----------|------------|--------|------------|--------|------------|--------|------------|---------|-------------|---------|-------------|
|                             | Total fat                                | Total SFAs | Total MUFAs | Total PUFAs | Code 1                                                                                    | Fraction 1 | Code 2   | Fraction 2 | Code 3   | Fraction 3 | Code 4 | Fraction 4 | Code 5 | Fraction 5 | Code 6   | Fraction 6 | Code 7 | Fraction 7 | Code 8 | Fraction 8 | Code 9 | Fraction 9 | Code 10 | Fraction 10 | Code 11 | Fraction 11 |
| fish_battered               | 11.80                                    | 1.71       | 6.65        | 2.75        | 16-369                                                                                    | 100        |          |            |          |            |        |            |        |            |          |            |        |            |        |            |        |            |         |             |         |             |
| fish_breaded                | 9.75                                     | 1.22       | 5.09        | 2.85        | 16-405                                                                                    | 16.5       | 16-407   | 16.5       | 16-403   | 34         | 16-370 | 33         |        |            |          |            |        |            |        |            |        |            |         |             |         |             |
| fish_lobcrab                | 2.83                                     | 0.43       | 0.61        | 0.72        | 16-391                                                                                    | 25         | 16-392   | 25         | 16-332   | 50         |        |            |        |            |          |            |        |            |        |            |        |            |         |             |         |             |
| fish_oily                   | 13.17                                    | 2.79       | 5.09        | 3.31        | 16-176                                                                                    | 10         | 16-397   | 10         | 16-394   | 10         | 16-358 | 30         | 16-422 | 10         | 16-419   | 20         | 16-400 | 10         |        |            |        |            |         |             |         |             |
| fish_other                  | 8.91                                     | 1.81       | 2.65        | 2.86        | 16-412                                                                                    | 70         | 16-404   | 6          | 16-396   | 12         | 16-402 | 12         |        |            |          |            |        |            |        |            |        |            |         |             |         |             |
| fish_prawns                 | 0.90                                     | 0.15       | 0.19        | 0.22        | 16-384                                                                                    | 100        |          |            |          |            |        |            |        |            |          |            |        |            |        |            |        |            |         |             |         |             |
| fish_shell                  | 1.96                                     | 0.36       | 0.21        | 0.55        | 16-262                                                                                    | 30         | 16-390   | 70         |          |            |        |            |        |            |          |            |        |            |        |            |        |            |         |             |         |             |
| fish_tinnedtuna             | 3.70                                     | 0.54       | 0.91        | 2.01        | 16-416                                                                                    | 50         | 16-417   | 50         |          |            |        |            |        |            |          |            |        |            |        |            |        |            |         |             |         |             |
| fish_white                  | 0.40                                     | 0.09       | 0.07        | 0.14        | 16-373                                                                                    | 50         | 16-376   | 50         |          |            |        |            |        |            |          |            |        |            |        |            |        |            |         |             |         |             |
| fruit_apple                 | 0.40                                     | 0.10       | 0.03        | 0.17        | 14-346                                                                                    | 100        |          |            |          |            |        |            |        |            |          |            |        |            |        |            |        |            |         |             |         |             |
| fruit_banana                | 0.10                                     | 0.04       | 0.00        | 0.04        | 14-318                                                                                    | 100        |          |            |          |            |        |            |        |            |          |            |        |            |        |            |        |            |         |             |         |             |
| fruit_berry                 | 0.29                                     | 0.04       | 0.07        | 0.15        | 14-375                                                                                    | 25         | 14-324   | 25         | 14-053   | 5          | 14-325 | 25         | 14-388 | 20         |          |            |        |            |        |            |        |            |         |             |         |             |
| fruit_cherry                | 0.40                                     | 0.08       | 0.09        | 0.10        | 14-382                                                                                    | 100        |          |            |          |            |        |            |        |            |          |            |        |            |        |            |        |            |         |             |         |             |
| fruit_dried                 | 0.90                                     | 0.14       | 0.30        | 0.27        | 14-393                                                                                    | 62.5       | 14-392   | 12.5       | 14-395   | 12.5       | 14-016 | 12.5       |        |            |          |            |        |            |        |            |        |            |         |             |         |             |
| fruit_grapefruit            | 0.35                                     | 0.05       | 0.05        | 0.08        | 14-384                                                                                    | 70         | 14-107   | 30         |          |            |        |            |        |            |          |            |        |            |        |            |        |            |         |             |         |             |
| fruit_grapes                | 0.15                                     | 0.06       | 0.01        | 0.06        | 14-323                                                                                    | 50         | 14-322   | 50         |          |            |        |            |        |            |          |            |        |            |        |            |        |            |         |             |         |             |
| fruit_mango                 | 0.38                                     | 0.09       | 0.14        | 0.07        | 63129010                                                                                  | 100        |          |            |          |            |        |            |        |            |          |            |        |            |        |            |        |            |         |             |         |             |
| fruit_melon                 | 0.17                                     | 0.03       | 0.03        | 0.03        | 14-339                                                                                    | 33.4       | 14-159   | 33.3       | 14-296   | 33.3       |        |            |        |            |          |            |        |            |        |            |        |            |         |             |         |             |
| fruit_mixed                 | 0.11                                     | 0.00       | 0.00        | 0.00        | 14-097                                                                                    | 35         | 14-336   | 30         | 14-333   | 35         |        |            |        |            |          |            |        |            |        |            |        |            |         |             |         |             |
| fruit_orange                | 0.20                                     | 0.05       | 0.05        | 0.07        | 14-327                                                                                    | 100        |          |            |          |            |        |            |        |            |          |            |        |            |        |            |        |            |         |             |         |             |
| fruit_other                 | 0.63                                     | 0.06       | 0.09        | 0.34        | 14-371                                                                                    | 60         | 63133010 | 10         | 14-226   | 10         | 14-025 | 10         | 14-091 | 10         |          |            |        |            |        |            |        |            |         |             |         |             |
| fruit_peach                 | 0.20                                     | 0.01       | 0.04        | 0.06        | 14-299                                                                                    | 50         | 14-380   | 50         |          |            |        |            |        |            |          |            |        |            |        |            |        |            |         |             |         |             |
| fruit_pear                  | 0.10                                     | 0.01       | 0.03        | 0.03        | 14-361                                                                                    | 100        |          |            |          |            |        |            |        |            |          |            |        |            |        |            |        |            |         |             |         |             |
| fruit_pineapple             | 0.07                                     | 0.00       | 0.04        | 0.04        | 14-376                                                                                    | 70         | 14-211   | 30         |          |            |        |            |        |            |          |            |        |            |        |            |        |            |         |             |         |             |
| fruit_plum                  | 0.10                                     | 0.00       | 0.00        | 0.00        | 14-220                                                                                    | 100        |          |            |          |            |        |            |        |            |          |            |        |            |        |            |        |            |         |             |         |             |
| fruit_prunes                | 0.30                                     | 0.06       | 0.04        | 0.12        | 14-391                                                                                    | 100        |          |            |          |            |        |            |        |            |          |            |        |            |        |            |        |            |         |             |         |             |
| fruit_satsuma               | 0.20                                     | 0.04       | 0.06        | 0.07        | 14-326                                                                                    | 100        |          |            |          |            |        |            |        |            |          |            |        |            |        |            |        |            |         |             |         |             |
| fruit_stewed                | 0.17                                     | 0.02       | 0.01        | 0.04        | 14-320                                                                                    | 33.4       | 14-253   | 33.3       | 14-314   | 33.3       |        |            |        |            |          |            |        |            |        |            |        |            |         |             |         |             |
| fruitcake                   | 12.10                                    | 4.64       | 4.72        | 1.88        | 11-829                                                                                    | 100        |          |            |          |            |        |            |        |            |          |            |        |            |        |            |        |            |         |             |         |             |
| fruitcake_gf                | 12.10                                    | 4.64       | 4.72        | 1.88        | 11-829                                                                                    | 100        |          |            |          |            |        |            |        |            |          |            |        |            |        |            |        |            |         |             |         |             |
| grains_couscous             | 0.95                                     | 0.14       | 0.12        | 0.38        | 11-901                                                                                    | 45         | 17-377   | 55         |          |            |        |            |        |            |          |            |        |            |        |            |        |            |         |             |         |             |
| grains_other                | 0.83                                     | 0.14       | 0.22        | 0.30        | 11-904                                                                                    | 10.5       | 17-377   | 24.5       | 11-869   | 55         |        | 11-877     | 10     |            |          |            |        |            |        |            |        |            |         |             |         |             |
| guacamole                   | 12.47                                    | 1.81       | 8.33        | 1.55        | 63105010                                                                                  | 85         | 14-277   | 5          | 13-517   | 10         |        |            |        |            |          |            |        |            |        |            |        |            |         |             |         |             |
| hummus                      | 20.95                                    | 3.47       | 8.64        | 8.47        | 41302120                                                                                  | 58         | 14-844   | 29         | 14-277   | 9          | 17-041 | 1.5        | 17-038 | 1.5        | 75111500 | 1          |        |            |        |            |        |            |         |             |         |             |
| icecream                    | 12.33                                    | 8.13       | 3.06        | 0.45        | 12-508                                                                                    | 33.4       | 12-509   | 33.3       | 12-510   | 33.3       |        |            |        |            |          |            |        |            |        |            |        |            |         |             |         |             |
| indian_snack                | 12.18                                    | 2.07       | 4.07        | 5.37        | 13-489                                                                                    | 8.75       | 41302120 | 20         | 75214010 | 8.75       | 17-045 | 5          | 11-886 | 7.5        | 19-326   | 25         | 15-305 | 25         |        |            |        |            |         |             |         |             |
| jam_honey                   | 0.00                                     | 0.00       | 0.00        | 0.00        | 17-688                                                                                    | 35         | 17-050   | 20         | 17-065   | 10         | 17-078 | 35         |        |            |          |            |        |            |        |            |        |            |         |             |         |             |
| mashed_butter_dunno         | 4.22                                     | 2.25       | 1.29        | 0.33        | 13-490                                                                                    | 89         | 12-313   | 6          | 17-655   | 2.5        | 17-685 | 1.25       | 17-661 | 1.25       |          |            |        |            |        |            |        |            |         |             |         |             |
| mashed_butter_fat           | 4.30                                     | 2.70       | 1.08        | 0.15        | 13-490                                                                                    | 89         | 12-313   | 6          | 17-685   | 2.5        | 17-661 | 2.5        |        |            |          |            |        |            |        |            |        |            |         |             |         |             |
| mashed_butter_lowfat        | 3.20                                     | 1.38       | 1.17        | 0.40        | 13-490                                                                                    | 89         | 12-313   | 6          | 17-656   | 5          |        |            |        |            |          |            |        |            |        |            |        |            |         |             |         |             |
| mashed_butter_spread_fat    | 4.15                                     | 1.80       | 1.51        | 0.51        | 13-490                                                                                    | 89         | 12-313   | 6          | 17-655   | 5          |        |            |        |            |          |            |        |            |        |            |        |            |         |             |         |             |
| mashed_butter_spread_lowfat | 3.20                                     | 1.38       | 1.17        | 0.40        | 13-490                                                                                    | 89         | 12-313   | 6          | 17-656   | 5          |        |            |        |            |          |            |        |            |        |            |        |            |         |             |         |             |
| mashed_fat_dunno            | 5.19                                     | 0.42       |             |             |                                                                                           |            |          |            |          |            |        |            |        |            |          |            |        |            |        |            |        |            |         |             |         |             |

**Table S1.** Individual FA and major nutrient calculation in the individual FA dataset (MCW + USDA). USDA food codes are highlighted in red.

| Food item              | Grams per 100g of food item <sup>1</sup> |            |             |             | Codes for foods from MCW and USDA and the fraction (%) assigned to each code <sup>2</sup> |            |          |            |          |            |        |            |        |            |        |            |        |            |        |            |        |            |         |             |         |             |
|------------------------|------------------------------------------|------------|-------------|-------------|-------------------------------------------------------------------------------------------|------------|----------|------------|----------|------------|--------|------------|--------|------------|--------|------------|--------|------------|--------|------------|--------|------------|---------|-------------|---------|-------------|
|                        | Total fat                                | Total SFAs | Total MUFAs | Total PUFAs | Code 1                                                                                    | Fraction 1 | Code 2   | Fraction 2 | Code 3   | Fraction 3 | Code 4 | Fraction 4 | Code 5 | Fraction 5 | Code 6 | Fraction 6 | Code 7 | Fraction 7 | Code 8 | Fraction 8 | Code 9 | Fraction 9 | Code 10 | Fraction 10 | Code 11 | Fraction 11 |
| mashed_s_olive_lowfat  | 2.14                                     | 0.54       | 1.12        | 0.33        | 13-490                                                                                    | 89         | 12-313   | 6          | 12-498   | 5          |        |            |        |            |        |            |        |            |        |            |        |            |         |             |         |             |
| mashed_s_olive_vlowfat | 2.14                                     | 0.54       | 1.12        | 0.33        | 13-490                                                                                    | 89         | 12-313   | 6          | 12-498   | 5          |        |            |        |            |        |            |        |            |        |            |        |            |         |             |         |             |
| mayo                   | 49.17                                    | 3.77       | 29.60       | 13.31       | 17-654                                                                                    | 50         | 17-041   | 11         | 17-339   | 9          | 17-377 | 20         | 17-063 | 7.5        | 12-939 | 2.5        |        |            |        |            |        |            |         |             |         |             |
| mayo_lowfat            | 16.39                                    | 2.24       | 5.47        | 7.94        | 83204000                                                                                  | 50         | 17-041   | 4.5        | 17-339   | 11         | 17-377 | 24         | 17-063 | 8          | 12-939 | 2.5        |        |            |        |            |        |            |         |             |         |             |
| meat_bacon_nofat       | 21.60                                    | 8.10       | 9.00        | 2.80        | 19-500                                                                                    | 100        |          |            |          |            |        |            |        |            |        |            |        |            |        |            |        |            |         |             |         |             |
| meat_bacon_withfat     | 23.86                                    | 8.77       | 10.17       | 3.17        | 19-500                                                                                    | 33.4       | 19-503   | 33.3       | 19-018   | 33.3       |        |            |        |            |        |            |        |            |        |            |        |            |         |             |         |             |
| meat_beef_nofat        | 8.65                                     | 3.68       | 3.70        | 0.50        | 18-022                                                                                    | 25         | 18-088   | 25         | 18-080   | 25         | 18-042 | 25         |        |            |        |            |        |            |        |            |        |            |         |             |         |             |
| meat_beef_withfat      | 13.45                                    | 5.73       | 5.80        | 0.62        | 18-009                                                                                    | 25         | 18-089   | 25         | 18-470   | 25         | 18-042 | 25         |        |            |        |            |        |            |        |            |        |            |         |             |         |             |
| meat_ham_nofat         | 3.30                                     | 1.10       | 1.39        | 0.52        | 19-496                                                                                    | 100        |          |            |          |            |        |            |        |            |        |            |        |            |        |            |        |            |         |             |         |             |
| meat_ham_withfat       | 14.99                                    | 5.16       | 6.59        | 2.15        | 19-021                                                                                    | 90         | 19-517   | 10         |          |            |        |            |        |            |        |            |        |            |        |            |        |            |         |             |         |             |
| meat_lamb_nofat        | 12.26                                    | 5.61       | 4.72        | 0.67        | 18-179                                                                                    | 30         | 18-141   | 30         | 18-186   | 20         | 18-159 | 20         |        |            |        |            |        |            |        |            |        |            |         |             |         |             |
| meat_lamb_withfat      | 22.14                                    | 10.59      | 8.53        | 1.10        | 18-180                                                                                    | 30         | 18-169   | 30         | 18-187   | 20         | 18-159 | 20         |        |            |        |            |        |            |        |            |        |            |         |             |         |             |
| meat_liverpate         | 22.81                                    | 6.62       | 7.93        | 2.67        | 18-413                                                                                    | 19.5       | 18-413   | 1          | 18-417   | 18         | 11-886 | 1          | 17-685 | 0.5        | 19-317 | 60         |        |            |        |            |        |            |         |             |         |             |
| meat_other             | 26.10                                    | 7.95       | 13.07       | 3.67        | 18-374                                                                                    | 64         | 18-390   | 25         | 18-383   | 11         |        |            |        |            |        |            |        |            |        |            |        |            |         |             |         |             |
| meat_pork_nofat        | 5.70                                     | 1.98       | 2.43        | 0.72        | 18-534                                                                                    | 33.4       | 18-515   | 33.3       | 18-527   | 33.3       |        |            |        |            |        |            |        |            |        |            |        |            |         |             |         |             |
| meat_pork_withfat      | 11.27                                    | 4.02       | 4.94        | 1.47        | 18-535                                                                                    | 33.4       | 18-517   | 33.3       | 18-528   | 33.3       |        |            |        |            |        |            |        |            |        |            |        |            |         |             |         |             |
| meat_sausage           | 23.18                                    | 8.42       | 9.81        | 3.50        | 19-657                                                                                    | 25         | 19-512   | 75         |          |            |        |            |        |            |        |            |        |            |        |            |        |            |         |             |         |             |
| milk_chol_cereal       | 0.30                                     | 0.13       | 0.06        | 0.01        | 12-307                                                                                    | 100        |          |            |          |            |        |            |        |            |        |            |        |            |        |            |        |            |         |             |         |             |
| milk_chol_coffee       | 0.30                                     | 0.13       | 0.06        | 0.01        | 12-307                                                                                    | 100        |          |            |          |            |        |            |        |            |        |            |        |            |        |            |        |            |         |             |         |             |
| milk_chol_glass        | 0.30                                     | 0.13       | 0.06        | 0.01        | 12-307                                                                                    | 100        |          |            |          |            |        |            |        |            |        |            |        |            |        |            |        |            |         |             |         |             |
| milk_chol_tea          | 0.30                                     | 0.13       | 0.06        | 0.01        | 12-307                                                                                    | 100        |          |            |          |            |        |            |        |            |        |            |        |            |        |            |        |            |         |             |         |             |
| milk_dontknow_cereal   | 1.80                                     | 1.13       | 0.44        | 0.04        | 12-313                                                                                    | 60         | 12-307   | 20         | 12-596   | 20         |        |            |        |            |        |            |        |            |        |            |        |            |         |             |         |             |
| milk_dontknow_coffee   | 1.80                                     | 1.13       | 0.44        | 0.04        | 12-313                                                                                    | 60         | 12-307   | 20         | 12-596   | 20         |        |            |        |            |        |            |        |            |        |            |        |            |         |             |         |             |
| milk_dontknow_glass    | 1.80                                     | 1.13       | 0.44        | 0.04        | 12-313                                                                                    | 60         | 12-307   | 20         | 12-596   | 20         |        |            |        |            |        |            |        |            |        |            |        |            |         |             |         |             |
| milk_dontknow_tea      | 1.80                                     | 1.13       | 0.44        | 0.04        | 12-313                                                                                    | 60         | 12-307   | 20         | 12-596   | 20         |        |            |        |            |        |            |        |            |        |            |        |            |         |             |         |             |
| milk_goatsheep_cereal  | 3.70                                     | 2.37       | 0.94        | 0.16        | 12-328                                                                                    | 100        |          |            |          |            |        |            |        |            |        |            |        |            |        |            |        |            |         |             |         |             |
| milk_goatsheep_coffee  | 4.23                                     | 2.67       | 1.07        | 0.21        | 12-328                                                                                    | 75         | 12-329   | 25         |          |            |        |            |        |            |        |            |        |            |        |            |        |            |         |             |         |             |
| milk_goatsheep_glass   | 4.23                                     | 2.67       | 1.07        | 0.21        | 12-328                                                                                    | 75         | 12-329   | 25         |          |            |        |            |        |            |        |            |        |            |        |            |        |            |         |             |         |             |
| milk_goatsheep_tea     | 4.23                                     | 2.67       | 1.07        | 0.21        | 12-328                                                                                    | 75         | 12-329   | 25         |          |            |        |            |        |            |        |            |        |            |        |            |        |            |         |             |         |             |
| milk_other_cereal      | 1.53                                     | 0.70       | 0.54        | 0.12        | 12-313                                                                                    | 27         | 11350000 | 40         | 11114330 | 33         |        |            |        |            |        |            |        |            |        |            |        |            |         |             |         |             |
| milk_other_coffee      | 1.53                                     | 0.70       | 0.54        | 0.12        | 12-313                                                                                    | 27         | 11350000 | 40         | 11114330 | 33         |        |            |        |            |        |            |        |            |        |            |        |            |         |             |         |             |
| milk_other_glass       | 1.53                                     | 0.70       | 0.54        | 0.12        | 12-313                                                                                    | 27         | 11350000 | 40         | 11114330 | 33         |        |            |        |            |        |            |        |            |        |            |        |            |         |             |         |             |
| milk_other_tea         | 1.53                                     | 0.70       | 0.54        | 0.12        | 12-313                                                                                    | 27         | 11350000 | 40         | 11114330 | 33         |        |            |        |            |        |            |        |            |        |            |        |            |         |             |         |             |
| milk_powdered_cereal   | 0.30                                     | 0.13       | 0.06        | 0.01        | 12-307                                                                                    | 100        |          |            |          |            |        |            |        |            |        |            |        |            |        |            |        |            |         |             |         |             |
| milk_powdered_coffee   | 18.10                                    | 16.50      | 0.58        | 0.02        | 11810000                                                                                  | 50         | 12210400 | 50         |          |            |        |            |        |            |        |            |        |            |        |            |        |            |         |             |         |             |
| milk_powdered_glass    | 0.30                                     | 0.13       | 0.06        | 0.01        | 12-307                                                                                    | 100        |          |            |          |            |        |            |        |            |        |            |        |            |        |            |        |            |         |             |         |             |
| milk_powdered_tea      | 0.72                                     | 0.47       | 0.19        | 0.03        | 11810000                                                                                  | 100        |          |            |          |            |        |            |        |            |        |            |        |            |        |            |        |            |         |             |         |             |
| milk_riceoatveg_cereal | 1.32                                     | 0.12       | 0.48        | 0.65        | 12-524                                                                                    | 50         | 11350000 | 50         |          |            |        |            |        |            |        |            |        |            |        |            |        |            |         |             |         |             |
| milk_riceoatveg_coffee | 1.32                                     | 0.12       | 0.48        | 0.65        | 12-524                                                                                    | 50         | 11350000 | 50         |          |            |        |            |        |            |        |            |        |            |        |            |        |            |         |             |         |             |
| milk_riceoatveg_glass  | 1.32                                     | 0.12       | 0.48        | 0.65        | 12-524                                                                                    | 50         | 11350000 | 50         |          |            |        |            |        |            |        |            |        |            |        |            |        |            |         |             |         |             |
| milk_riceoatveg_tea    | 1.32                                     | 0.12       | 0.48        | 0.65        | 12-524                                                                                    | 50         | 11350000 | 50         |          |            |        |            |        |            |        |            |        |            |        |            |        |            |         |             |         |             |
| milk_semi_cereal       | 1.70                                     | 1.07       | 0.40        | 0.04        | 12-313                                                                                    | 100        |          |            |          |            |        |            |        |            |        |            |        |            |        |            |        |            |         |             |         |             |
| milk                   |                                          |            |             |             |                                                                                           |            |          |            |          |            |        |            |        |            |        |            |        |            |        |            |        |            |         |             |         |             |

**Table S1.** Individual FA and major nutrient calculation in the individual FA dataset (MCW + USDA). USDA food codes are highlighted in red.

| Food item                      | Grams per 100g of food item <sup>1</sup> |            |             |             | Codes for foods from MCW and USDA and the fraction (%) assigned to each code <sup>2</sup> |            |        |            |        |            |        |            |        |            |        |            |        |            |        |            |        |            |         |             |         |             |
|--------------------------------|------------------------------------------|------------|-------------|-------------|-------------------------------------------------------------------------------------------|------------|--------|------------|--------|------------|--------|------------|--------|------------|--------|------------|--------|------------|--------|------------|--------|------------|---------|-------------|---------|-------------|
|                                | Total fat                                | Total SFAs | Total MUFAs | Total PUFAs | Code 1                                                                                    | Fraction 1 | Code 2 | Fraction 2 | Code 3 | Fraction 3 | Code 4 | Fraction 4 | Code 5 | Fraction 5 | Code 6 | Fraction 6 | Code 7 | Fraction 7 | Code 8 | Fraction 8 | Code 9 | Fraction 9 | Code 10 | Fraction 10 | Code 11 | Fraction 11 |
| oatcak_s_butterspr_lowfat_thin | 60.20                                    | 25.70      | 22.66       |             | 17-656                                                                                    | 100        |        |            |        |            |        |            |        |            |        |            |        |            |        |            |        |            |         |             |         |             |
| oatcak_s_dairy_chol_med        | 39.00                                    | 9.76       | 17.39       | 9.82        | 12-497                                                                                    | 100        |        |            |        |            |        |            |        |            |        |            |        |            |        |            |        |            |         |             |         |             |
| oatcak_s_dairy_chol_thick      | 39.00                                    | 9.76       | 17.39       | 9.82        | 12-497                                                                                    | 100        |        |            |        |            |        |            |        |            |        |            |        |            |        |            |        |            |         |             |         |             |
| oatcak_s_dairy_chol_thin       | 39.00                                    | 9.76       | 17.39       | 9.82        | 12-497                                                                                    | 100        |        |            |        |            |        |            |        |            |        |            |        |            |        |            |        |            |         |             |         |             |
| oatcak_s_dairy_dunno_med       | 49.80                                    | 12.69      | 23.67       | 10.86       | 12-497                                                                                    | 50         | 12-504 | 50         |        |            |        |            |        |            |        |            |        |            |        |            |        |            |         |             |         |             |
| oatcak_s_dairy_dunno_thick     | 49.80                                    | 12.69      | 23.67       | 10.86       | 12-497                                                                                    | 50         | 12-504 | 50         |        |            |        |            |        |            |        |            |        |            |        |            |        |            |         |             |         |             |
| oatcak_s_dairy_dunno_thin      | 49.80                                    | 12.69      | 23.67       | 10.86       | 12-497                                                                                    | 50         | 12-504 | 50         |        |            |        |            |        |            |        |            |        |            |        |            |        |            |         |             |         |             |
| oatcak_s_dairy_fat_med         | 60.60                                    | 15.61      | 29.95       | 11.90       | 12-504                                                                                    | 100        |        |            |        |            |        |            |        |            |        |            |        |            |        |            |        |            |         |             |         |             |
| oatcak_s_dairy_fat_thick       | 60.60                                    | 15.61      | 29.95       | 11.90       | 12-504                                                                                    | 100        |        |            |        |            |        |            |        |            |        |            |        |            |        |            |        |            |         |             |         |             |
| oatcak_s_dairy_fat_thin        | 60.60                                    | 15.61      | 29.95       | 11.90       | 12-504                                                                                    | 100        |        |            |        |            |        |            |        |            |        |            |        |            |        |            |        |            |         |             |         |             |
| oatcak_s_dairy_lowfat_med      | 39.00                                    | 9.76       | 17.39       | 9.82        | 12-497                                                                                    | 100        |        |            |        |            |        |            |        |            |        |            |        |            |        |            |        |            |         |             |         |             |
| oatcak_s_dairy_lowfat_thick    | 39.00                                    | 9.76       | 17.39       | 9.82        | 12-497                                                                                    | 100        |        |            |        |            |        |            |        |            |        |            |        |            |        |            |        |            |         |             |         |             |
| oatcak_s_dairy_lowfat_thin     | 39.00                                    | 9.76       | 17.39       | 9.82        | 12-497                                                                                    | 100        |        |            |        |            |        |            |        |            |        |            |        |            |        |            |        |            |         |             |         |             |
| oatcak_s_dairy_vlowfat_med     | 39.00                                    | 9.76       | 17.39       | 9.82        | 12-497                                                                                    | 100        |        |            |        |            |        |            |        |            |        |            |        |            |        |            |        |            |         |             |         |             |
| oatcak_s_dairy_vlowfat_thick   | 39.00                                    | 9.76       | 17.39       | 9.82        | 12-497                                                                                    | 100        |        |            |        |            |        |            |        |            |        |            |        |            |        |            |        |            |         |             |         |             |
| oatcak_s_dairy_vlowfat_thin    | 39.00                                    | 9.76       | 17.39       | 9.82        | 12-497                                                                                    | 100        |        |            |        |            |        |            |        |            |        |            |        |            |        |            |        |            |         |             |         |             |
| oatcak_s_dunno_chol_med        | 37.95                                    | 9.16       | 14.45       | 12.39       | 12-497                                                                                    | 50         | 12-499 | 50         |        |            |        |            |        |            |        |            |        |            |        |            |        |            |         |             |         |             |
| oatcak_s_dunno_chol_thick      | 37.95                                    | 9.16       | 14.45       | 12.39       | 12-497                                                                                    | 50         | 12-499 | 50         |        |            |        |            |        |            |        |            |        |            |        |            |        |            |         |             |         |             |
| oatcak_s_dunno_chol_thin       | 37.95                                    | 9.16       | 14.45       | 12.39       | 12-497                                                                                    | 50         | 12-499 | 50         |        |            |        |            |        |            |        |            |        |            |        |            |        |            |         |             |         |             |
| oatcak_s_dunno_dunno_med       | 48.93                                    | 11.78      | 19.14       | 15.46       | 12-497                                                                                    | 25         | 12-499 | 25         | 12-503 | 25         | 12-504 | 25         |        |            |        |            |        |            |        |            |        |            |         |             |         |             |
| oatcak_s_dunno_dunno_thick     | 48.93                                    | 11.78      | 19.14       | 15.46       | 12-497                                                                                    | 25         | 12-499 | 25         | 12-503 | 25         | 12-504 | 25         |        |            |        |            |        |            |        |            |        |            |         |             |         |             |
| oatcak_s_dunno_dunno_thin      | 48.93                                    | 11.78      | 19.14       | 15.46       | 12-497                                                                                    | 25         | 12-499 | 25         | 12-503 | 25         | 12-504 | 25         |        |            |        |            |        |            |        |            |        |            |         |             |         |             |
| oatcak_s_dunno_fat_med         | 59.90                                    | 14.41      | 23.83       | 18.54       | 12-503                                                                                    | 50         | 12-504 | 50         |        |            |        |            |        |            |        |            |        |            |        |            |        |            |         |             |         |             |
| oatcak_s_dunno_fat_thick       | 59.90                                    | 14.41      | 23.83       | 18.54       | 12-503                                                                                    | 50         | 12-504 | 50         |        |            |        |            |        |            |        |            |        |            |        |            |        |            |         |             |         |             |
| oatcak_s_dunno_fat_thin        | 59.90                                    | 14.41      | 23.83       | 18.54       | 12-503                                                                                    | 50         | 12-504 | 50         |        |            |        |            |        |            |        |            |        |            |        |            |        |            |         |             |         |             |
| oatcak_s_dunno_lowfat_med      | 37.95                                    | 9.16       | 14.45       | 12.39       | 12-497                                                                                    | 50         | 12-499 | 50         |        |            |        |            |        |            |        |            |        |            |        |            |        |            |         |             |         |             |
| oatcak_s_dunno_lowfat_thick    | 37.95                                    | 9.16       | 14.45       | 12.39       | 12-497                                                                                    | 50         | 12-499 | 50         |        |            |        |            |        |            |        |            |        |            |        |            |        |            |         |             |         |             |
| oatcak_s_dunno_lowfat_thin     | 37.95                                    | 9.16       | 14.45       | 12.39       | 12-497                                                                                    | 50         | 12-499 | 50         |        |            |        |            |        |            |        |            |        |            |        |            |        |            |         |             |         |             |
| oatcak_s_dunno_vlowfat_med     | 37.95                                    | 9.16       | 14.45       | 12.39       | 12-497                                                                                    | 50         | 12-499 | 50         |        |            |        |            |        |            |        |            |        |            |        |            |        |            |         |             |         |             |
| oatcak_s_dunno_vlowfat_thick   | 37.95                                    | 9.16       | 14.45       | 12.39       | 12-497                                                                                    | 50         | 12-499 | 50         |        |            |        |            |        |            |        |            |        |            |        |            |        |            |         |             |         |             |
| oatcak_s_dunno_vlowfat_thin    | 37.95                                    | 9.16       | 14.45       | 12.39       | 12-497                                                                                    | 50         | 12-499 | 50         |        |            |        |            |        |            |        |            |        |            |        |            |        |            |         |             |         |             |
| oatcak_s_hardmarg_med          | 76.40                                    | 26.41      | 34.00       | 12.21       | 12-500                                                                                    | 100        |        |            |        |            |        |            |        |            |        |            |        |            |        |            |        |            |         |             |         |             |
| oatcak_s_hardmarg_thick        | 76.40                                    | 26.41      | 34.00       | 12.21       | 12-500                                                                                    | 100        |        |            |        |            |        |            |        |            |        |            |        |            |        |            |        |            |         |             |         |             |
| oatcak_s_hardmarg_thin         | 76.40                                    | 26.41      | 34.00       | 12.21       | 12-500                                                                                    | 100        |        |            |        |            |        |            |        |            |        |            |        |            |        |            |        |            |         |             |         |             |
| oatcak_s_olive_chol_med        | 38.90                                    | 8.90       | 21.68       | 6.36        | 12-498                                                                                    | 100        |        |            |        |            |        |            |        |            |        |            |        |            |        |            |        |            |         |             |         |             |
| oatcak_s_olive_chol_thick      | 38.90                                    | 8.90       | 21.68       | 6.36        | 12-498                                                                                    | 100        |        |            |        |            |        |            |        |            |        |            |        |            |        |            |        |            |         |             |         |             |
| oatcak_s_olive_chol_thin       | 38.90                                    | 8.90       | 21.68       | 6.36        | 12-498                                                                                    | 100        |        |            |        |            |        |            |        |            |        |            |        |            |        |            |        |            |         |             |         |             |
| oatcak_s_olive_dunno_med       | 49.00                                    | 11.06      | 26.53       | 8.95        | 12-498                                                                                    | 50         | 12-505 | 50         |        |            |        |            |        |            |        |            |        |            |        |            |        |            |         |             |         |             |
| oatcak_s_olive_dunno_thick     | 49.00                                    | 11.06      | 26.53       | 8.95        | 12-498                                                                                    | 50         | 12-505 | 50         |        |            |        |            |        |            |        |            |        |            |        |            |        |            |         |             |         |             |
| oatcak_s_olive_dunno_thin      | 49.00                                    | 11.06      | 26.53       | 8.95        | 12-498                                                                                    | 50         | 12-505 | 50         |        |            |        |            |        |            |        |            |        |            |        |            |        |            |         |             |         |             |
| oatcak_s_olive_fat_med         | 59.10                                    | 13.22      | 31.37       | 11.53       | 12-505                                                                                    | 100        |        |            |        |            |        |            |        |            |        |            |        |            |        |            |        |            |         |             |         |             |
| oatcak_s_olive_fat_thick       | 59.10                                    | 13.22      | 31.37       | 11.53       | 12-505                                                                                    | 100        |        |            |        |            |        |            |        |            |        |            |        |            |        |            |        |            |         |             |         |             |
| oatcak_s_olive_fat_thin        | 59.10                                    | 13.22      | 31.37       | 11.53       | 12-505                                                                                    | 100        |        |            |        |            |        |            |        |            |        |            |        |            |        |            |        |            |         |             |         |             |
| oatcak_s_olive_lowfat_med      | 38.90                                    | 8.90       | 21.68       | 6.36        | 12-498                                                                                    | 100        |        |            |        |            |        |            |        |            |        |            |        |            |        |            |        |            |         |             |         |             |

Table S1. Individual FA and major nutrient calculation in the individual FA dataset (MCW + USDA). USDA food codes are highlighted in red.

| Food item                      | Grams per 100g of food item <sup>1</sup> |            |             |             | Codes for foods from MCW and USDA and the fraction (%) assigned to each code <sup>2</sup> |            |        |            |          |            |          |            |          |            |          |            |        |            |        |            |        |            |         |             |         |             |
|--------------------------------|------------------------------------------|------------|-------------|-------------|-------------------------------------------------------------------------------------------|------------|--------|------------|----------|------------|----------|------------|----------|------------|----------|------------|--------|------------|--------|------------|--------|------------|---------|-------------|---------|-------------|
|                                | Total fat                                | Total SFAs | Total MUFAs | Total PUFAs | Code 1                                                                                    | Fraction 1 | Code 2 | Fraction 2 | Code 3   | Fraction 3 | Code 4   | Fraction 4 | Code 5   | Fraction 5 | Code 6   | Fraction 6 | Code 7 | Fraction 7 | Code 8 | Fraction 8 | Code 9 | Fraction 9 | Code 10 | Fraction 10 | Code 11 | Fraction 11 |
| oatcak_s_soya_fat_thin         | 59.20                                    | 13.21      | 17.70       | 25.17       | 12-503                                                                                    | 100        |        |            |          |            |          |            |          |            |          |            |        |            |        |            |        |            |         |             |         |             |
| oatcak_s_soya_lowfat_med       | 36.90                                    | 8.55       | 11.50       | 14.96       | 12-499                                                                                    | 100        |        |            |          |            |          |            |          |            |          |            |        |            |        |            |        |            |         |             |         |             |
| oatcak_s_soya_lowfat_thick     | 36.90                                    | 8.55       | 11.50       | 14.96       | 12-499                                                                                    | 100        |        |            |          |            |          |            |          |            |          |            |        |            |        |            |        |            |         |             |         |             |
| oatcak_s_soya_lowfat_thin      | 36.90                                    | 8.55       | 11.50       | 14.96       | 12-499                                                                                    | 100        |        |            |          |            |          |            |          |            |          |            |        |            |        |            |        |            |         |             |         |             |
| oatcak_s_soya_vlowfat_med      | 36.90                                    | 8.55       | 11.50       | 14.96       | 12-499                                                                                    | 100        |        |            |          |            |          |            |          |            |          |            |        |            |        |            |        |            |         |             |         |             |
| oatcak_s_soya_vlowfat_thick    | 36.90                                    | 8.55       | 11.50       | 14.96       | 12-499                                                                                    | 100        |        |            |          |            |          |            |          |            |          |            |        |            |        |            |        |            |         |             |         |             |
| oatcak_s_soya_vlowfat_thin     | 36.90                                    | 8.55       | 11.50       | 14.96       | 12-499                                                                                    | 100        |        |            |          |            |          |            |          |            |          |            |        |            |        |            |        |            |         |             |         |             |
| oatcakes                       | 20.00                                    | 5.67       | 9.32        | 3.87        | 11-823                                                                                    | 100        |        |            |          |            |          |            |          |            |          |            |        |            |        |            |        |            |         |             |         |             |
| pancake_blini_chol             | 7.68                                     | 0.91       | 4.09        | 2.01        | 11-886                                                                                    | 26         | 12-940 | 12         | 17-686   | 6          | 12-307   | 56         |          |            |          |            |        |            |        |            |        |            |         |             |         |             |
| pancake_blini_dontknow         | 8.52                                     | 1.46       | 4.31        | 2.03        | 11-886                                                                                    | 26         | 12-940 | 12         | 17-686   | 6          | 12-313   | 33.6       | 12-307   | 11.2       | 12-596   | 11.2       |        |            |        |            |        |            |         |             |         |             |
| pancake_blini_goatsheep        | 10.17                                    | 2.50       | 4.74        | 2.14        | 11-886                                                                                    | 26         | 12-940 | 12         | 17-686   | 6          | 12-328   | 28         | 12-329   | 28         |          |            |        |            |        |            |        |            |         |             |         |             |
| pancake_blini_other            | 8.37                                     | 1.23       | 4.36        | 2.07        | 11-886                                                                                    | 26         | 12-940 | 12         | 17-686   | 6          | 12-313   | 15.12      | 11350000 | 22.4       | 11114330 | 18.48      |        |            |        |            |        |            |         |             |         |             |
| pancake_blini_powdered         | 7.68                                     | 0.91       | 4.09        | 2.01        | 11-886                                                                                    | 26         | 12-940 | 12         | 17-686   | 6          | 12-307   | 56         |          |            |          |            |        |            |        |            |        |            |         |             |         |             |
| pancake_blini_riceoatveg       | 8.25                                     | 0.90       | 4.33        | 2.37        | 11-886                                                                                    | 26         | 12-940 | 12         | 17-686   | 6          | 12-524   | 28         | 11350000 | 28         |          |            |        |            |        |            |        |            |         |             |         |             |
| pancake_blini_semi             | 8.46                                     | 1.43       | 4.28        | 2.02        | 11-886                                                                                    | 26         | 12-940 | 12         | 17-686   | 6          | 12-313   | 56         |          |            |          |            |        |            |        |            |        |            |         |             |         |             |
| pancake_blini_skimmed          | 7.68                                     | 0.91       | 4.09        | 2.01        | 11-886                                                                                    | 26         | 12-940 | 12         | 17-686   | 6          | 12-307   | 56         |          |            |          |            |        |            |        |            |        |            |         |             |         |             |
| pancake_blini_soya_ca          | 8.41                                     | 0.97       | 4.25        | 2.62        | 11-886                                                                                    | 26         | 12-940 | 12         | 17-686   | 6          | 12-524   | 56         |          |            |          |            |        |            |        |            |        |            |         |             |         |             |
| pancake_blini_soya_noca        | 8.41                                     | 0.97       | 4.25        | 2.62        | 11-886                                                                                    | 26         | 12-940 | 12         | 17-686   | 6          | 12-524   | 56         |          |            |          |            |        |            |        |            |        |            |         |             |         |             |
| pancake_blini_whole            | 9.53                                     | 2.12       | 4.60        | 2.05        | 11-886                                                                                    | 26         | 12-940 | 12         | 17-686   | 6          | 12-596   | 56         |          |            |          |            |        |            |        |            |        |            |         |             |         |             |
| pancake_crepe_chol             | 7.68                                     | 0.91       | 4.09        | 2.01        | 11-886                                                                                    | 26         | 12-940 | 12         | 17-686   | 6          | 12-307   | 56         |          |            |          |            |        |            |        |            |        |            |         |             |         |             |
| pancake_crepe_dontknow         | 8.52                                     | 1.46       | 4.31        | 2.03        | 11-886                                                                                    | 26         | 12-940 | 12         | 17-686   | 6          | 12-313   | 33.6       | 12-307   | 11.2       | 12-596   | 11.2       |        |            |        |            |        |            |         |             |         |             |
| pancake_crepe_goatsheep        | 10.17                                    | 2.50       | 4.74        | 2.14        | 11-886                                                                                    | 26         | 12-940 | 12         | 17-686   | 6          | 12-328   | 28         | 12-329   | 28         |          |            |        |            |        |            |        |            |         |             |         |             |
| pancake_crepe_other            | 8.37                                     | 1.23       | 4.36        | 2.07        | 11-886                                                                                    | 26         | 12-940 | 12         | 17-686   | 6          | 12-313   | 15.12      | 11350000 | 22.4       | 11114330 | 18.48      |        |            |        |            |        |            |         |             |         |             |
| pancake_crepe_powdered         | 7.68                                     | 0.91       | 4.09        | 2.01        | 11-886                                                                                    | 26         | 12-940 | 12         | 17-686   | 6          | 12-307   | 56         |          |            |          |            |        |            |        |            |        |            |         |             |         |             |
| pancake_crepe_riceoatveg       | 8.25                                     | 0.90       | 4.33        | 2.37        | 11-886                                                                                    | 26         | 12-940 | 12         | 17-686   | 6          | 12-524   | 28         | 11350000 | 28         |          |            |        |            |        |            |        |            |         |             |         |             |
| pancake_crepe_semi             | 8.46                                     | 1.43       | 4.28        | 2.02        | 11-886                                                                                    | 26         | 12-940 | 12         | 17-686   | 6          | 12-313   | 56         |          |            |          |            |        |            |        |            |        |            |         |             |         |             |
| pancake_crepe_skimmed          | 7.68                                     | 0.91       | 4.09        | 2.01        | 11-886                                                                                    | 26         | 12-940 | 12         | 17-686   | 6          | 12-307   | 56         |          |            |          |            |        |            |        |            |        |            |         |             |         |             |
| pancake_crepe_soya_ca          | 8.41                                     | 0.97       | 4.25        | 2.62        | 11-886                                                                                    | 26         | 12-940 | 12         | 17-686   | 6          | 12-524   | 56         |          |            |          |            |        |            |        |            |        |            |         |             |         |             |
| pancake_crepe_soya_noca        | 8.41                                     | 0.97       | 4.25        | 2.62        | 11-886                                                                                    | 26         | 12-940 | 12         | 17-686   | 6          | 12-524   | 56         |          |            |          |            |        |            |        |            |        |            |         |             |         |             |
| pancake_crepe_whole            | 9.53                                     | 2.12       | 4.60        | 2.05        | 11-886                                                                                    | 26         | 12-940 | 12         | 17-686   | 6          | 12-596   | 56         |          |            |          |            |        |            |        |            |        |            |         |             |         |             |
| pasta_brown                    | 0.40                                     | 0.06       | 0.05        | 0.15        | 11-720                                                                                    | 100        |        |            |          |            |          |            |          |            |          |            |        |            |        |            |        |            |         |             |         |             |
| pasta_gf                       | 0.93                                     | 0.15       | 0.15        | 0.30        | 11-450                                                                                    | 25         | 11-722 | 50         | 11-724   | 25         |          |            |          |            |          |            |        |            |        |            |        |            |         |             |         |             |
| pasta_white                    | 0.93                                     | 0.15       | 0.15        | 0.30        | 11-450                                                                                    | 25         | 11-722 | 50         | 11-724   | 25         |          |            |          |            |          |            |        |            |        |            |        |            |         |             |         |             |
| pesto                          | 42.50                                    | 6.50       | 16.55       | 17.55       | 17-622                                                                                    | 100        |        |            |          |            |          |            |          |            |          |            |        |            |        |            |        |            |         |             |         |             |
| pizza                          | 9.80                                     | 4.12       | 3.67        | 1.39        | 11-936                                                                                    | 100        |        |            |          |            |          |            |          |            |          |            |        |            |        |            |        |            |         |             |         |             |
| pizza_gf                       | 9.80                                     | 4.12       | 3.67        | 1.39        | 11-936                                                                                    | 100        |        |            |          |            |          |            |          |            |          |            |        |            |        |            |        |            |         |             |         |             |
| pnutbutter_nutella             | 46.16                                    | 11.75      | 18.98       | 13.41       | 14-892                                                                                    | 70         | 17-687 | 30         |          |            |          |            |          |            |          |            |        |            |        |            |        |            |         |             |         |             |
| por_milk_chol                  | 1.28                                     | 0.28       | 0.46        | 0.40        | 11-792                                                                                    | 14         | 12-307 | 86         |          |            |          |            |          |            |          |            |        |            |        |            |        |            |         |             |         |             |
| por_milk_chol_driedfruit       | 1.08                                     | 0.23       | 0.36        | 0.32        | 11-792                                                                                    | 11         | 14-087 | 13         | 12-307   | 76         |          |            |          |            |          |            |        |            |        |            |        |            |         |             |         |             |
| por_milk_dontknow              | 2.57                                     | 1.14       | 0.79        | 0.43        | 11-792                                                                                    | 14         | 12-313 | 51.6       | 12-307   | 17.2       | 12-596   | 17.2       |          |            |          |            |        |            |        |            |        |            |         |             |         |             |
| por_milk_dontknow_driedfruit   | 2.22                                     | 0.99       | 0.66        | 0.34        | 11-792                                                                                    | 11         | 14-087 | 13         | 12-313   | 45.6       | 12-307   | 15.2       | 12-596   | 15.2       |          |            |        |            |        |            |        |            |         |             |         |             |
| por_milk_goatsheep             | 5.11                                     | 2.73       | 1.44        | 0.61        | 11-792                                                                                    | 14         | 12-328 | 43         | 12-329   | 43         |          |            |          |            |          |            |        |            |        |            |        |            |         |             |         |             |
| por_milk_goatsheep_driedfruit  | 4.47                                     | 2.39       | 1.23        | 0.50        | 11-792                                                                                    | 11         | 14-087 | 13         | 12-328   | 38         | 12-329   | 38         |          |            |          |            |        |            |        |            |        |            |         |             |         |             |
| por_milk_other                 | 2.34                                     | 0.77       | 0.87        | 0.49        | 11-792                                                                                    | 14         | 12-313 | 23.22      | 11350000 | 34.4       | 11114330 | 28.38      |          |            |          |            |        |            |        |            |        |            |         |             |         |             |
| por_milk_other_driedfruit      | 2.02                                     | 0.67       | 0.73        | 0.40        | 11-792                                                                                    | 11         | 14-087 | 13         | 12-313   | 20.52      | 11350000 | 30.4       | 11114330 | 25.08      |          |            |        |            |        |            |        |            |         |             |         |             |
| por_milk_powdered              | 1.28                                     | 0.28       | 0.46        | 0.40        | 11-792                                                                                    | 14         | 12-307 | 86         |          |            |          |            |          |            |          |            |        |            |        |            |        |            |         |             |         |             |
| por_milk_powdered_driedfruit   | 1.08                                     | 0.23       | 0.36        | 0.32        | 11-792                                                                                    | 11         | 14-087 | 13         | 12-307   | 76         |          |            |          |            |          |            |        |            |        |            |        |            |         |             |         |             |
| por_milk_riceoatveg            | 2.16                                     | 0.27       | 0.82        | 0.95        | 11-792                                                                                    | 14         | 12-524 | 43         | 11350000 | 43         |          |            |          |            |          |            |        |            |        |            |        |            |         |             |         |             |
| por_milk_riceoatveg_driedfruit | 1.86                                     | 0.22       | 0.68        | 0.81        | 11-792                                                                                    | 11         | 14-087 | 13         | 12-524   | 38         | 11350000 | 38         |          |            |          |            |        |            |        |            |        |            |         |             |         |             |
| por_milk_semi                  | 2.48                                     | 1.09       | 0.75        | 0.43        | 11-792                                                                                    | 14         | 12-313 | 86         |          |            |          |            |          |            |          |            |        |            |        |            |        |            |         |             |         |             |
| por_milk_semi_driedfruit       | 2.15                                     | 0.95       | 0.62        | 0.34        | 11-792                                                                                    | 11         | 14-087 | 13         | 12-313   | 76         |          |            |          |            |          |            |        |            |        |            |        |            |         |             |         |             |
| por_milk_skimmed               | 1.28                                     | 0.28       | 0.46        | 0.40        | 11-792                                                                                    | 14         | 12-307 | 86         |          |            |          |            |          |            |          |            |        |            |        |            |        |            |         |             |         |             |
| por_milk_skimmed_driedfruit    | 1.08                                     | 0.23       | 0.36        | 0.32        | 11-792                                                                                    | 11         | 14-087 | 13         | 12-307   | 76         |          |            |          |            |          |            |        |            |        |            |        |            |         |             |         |             |

**Table S1.** Individual FA and major nutrient calculation in the individual FA dataset (MCW + USDA). USDA food codes are highlighted in red.

| Food item               | Grams per 100g of food item <sup>1</sup> |            |             |            | Codes for foods from MCW and USDA and the fraction (%) assigned to each code <sup>2</sup> |            |        |            |          |            |          |            |          |            |          |            |        |            |        |            |        |            |         |             |         |             |
|-------------------------|------------------------------------------|------------|-------------|------------|-------------------------------------------------------------------------------------------|------------|--------|------------|----------|------------|----------|------------|----------|------------|----------|------------|--------|------------|--------|------------|--------|------------|---------|-------------|---------|-------------|
|                         | Total fat                                | Total SFAs | Total MUFAs | Total PUFA | Code 1                                                                                    | Fraction 1 | Code 2 | Fraction 2 | Code 3   | Fraction 3 | Code 4   | Fraction 4 | Code 5   | Fraction 5 | Code 6   | Fraction 6 | Code 7 | Fraction 7 | Code 8 | Fraction 8 | Code 9 | Fraction 9 | Code 10 | Fraction 10 | Code 11 | Fraction 11 |
| sauce_cheese_other      | 6.04                                     | 3.55       | 1.71        | 0.26       | 11-886                                                                                    | 2.5        | 17-685 | 2.5        | 12-346   | 7.5        | 12-313   | 23.625     | 11350000 | 35         | 11114330 | 28.875     |        |            |        |            |        |            |         |             |         |             |
| sauce_cheese_powdered   | 4.97                                     | 3.05       | 1.29        | 0.17       | 11-886                                                                                    | 2.5        | 17-685 | 2.5        | 12-346   | 7.5        | 12-307   | 87.5       |          |            |          |            |        |            |        |            |        |            |         |             |         |             |
| sauce_cheese_riceoatveg | 5.29                                     | 2.07       | 1.57        | 1.29       | 11-886                                                                                    | 2.5        | 12-503 | 2.5        | 12-346   | 7.5        | 12-524   | 43.75      | 11350000 | 43.75      |          |            |        |            |        |            |        |            |         |             |         |             |
| sauce_cheese_semi       | 6.20                                     | 3.88       | 1.59        | 0.19       | 11-886                                                                                    | 2.5        | 17-685 | 2.5        | 12-346   | 7.5        | 12-313   | 87.5       |          |            |          |            |        |            |        |            |        |            |         |             |         |             |
| sauce_cheese_skimmed    | 4.97                                     | 3.05       | 1.29        | 0.17       | 11-886                                                                                    | 2.5        | 17-685 | 2.5        | 12-346   | 7.5        | 12-307   | 87.5       |          |            |          |            |        |            |        |            |        |            |         |             |         |             |
| sauce_cheese_soya_ca    | 5.53                                     | 2.18       | 1.44        | 1.68       | 11-886                                                                                    | 2.5        | 12-503 | 2.5        | 12-346   | 7.5        | 12-524   | 87.5       |          |            |          |            |        |            |        |            |        |            |         |             |         |             |
| sauce_cheese_soya_noca  | 5.53                                     | 2.18       | 1.44        | 1.68       | 11-886                                                                                    | 2.5        | 12-503 | 2.5        | 12-346   | 7.5        | 12-524   | 87.5       |          |            |          |            |        |            |        |            |        |            |         |             |         |             |
| sauce_cheese_whole      | 7.86                                     | 4.94       | 2.08        | 0.24       | 11-886                                                                                    | 2.5        | 17-685 | 2.5        | 12-346   | 7.5        | 12-596   | 87.5       |          |            |          |            |        |            |        |            |        |            |         |             |         |             |
| sauce_gravy             | 6.06                                     | 3.09       | 2.38        | 0.20       | 28501010                                                                                  | 95         | 17-487 | 5          |          |            |          |            |          |            |          |            |        |            |        |            |        |            |         |             |         |             |
| sauce_ketchup           | 0.10                                     | 0.00       | 0.00        | 0.00       | 17-709                                                                                    | 100        |        |            |          |            |          |            |          |            |          |            |        |            |        |            |        |            |         |             |         |             |
| sauce_tomato            | 3.38                                     | 0.48       | 1.64        | 1.13       | 17-619                                                                                    | 75         | 17-621 | 25         |          |            |          |            |          |            |          |            |        |            |        |            |        |            |         |             |         |             |
| sauce_white_chol        | 2.46                                     | 1.46       | 0.60        | 0.10       | 11-886                                                                                    | 10         | 17-685 | 2.5        | 12-307   | 87.5       |          |            |          |            |          |            |        |            |        |            |        |            |         |             |         |             |
| sauce_white_dontknow    | 3.77                                     | 2.33       | 0.93        | 0.13       | 11-886                                                                                    | 10         | 17-685 | 2.5        | 12-313   | 52.5       | 12-307   | 17.5       | 12-596   | 17.5       |          |            |        |            |        |            |        |            |         |             |         |             |
| sauce_white_goatsheep   | 6.35                                     | 3.95       | 1.60        | 0.31       | 11-886                                                                                    | 10         | 17-685 | 2.5        | 12-328   | 43.75      | 12-329   | 43.75      |          |            |          |            |        |            |        |            |        |            |         |             |         |             |
| sauce_white_other       | 3.53                                     | 1.96       | 1.02        | 0.20       | 11-886                                                                                    | 10         | 17-685 | 2.5        | 12-313   | 23.625     | 11350000 | 35         | 11114330 | 28.875     |          |            |        |            |        |            |        |            |         |             |         |             |
| sauce_white_powdered    | 2.46                                     | 1.46       | 0.60        | 0.10       | 11-886                                                                                    | 10         | 17-685 | 2.5        | 12-307   | 87.5       |          |            |          |            |          |            |        |            |        |            |        |            |         |             |         |             |
| sauce_white_riceoatveg  | 2.78                                     | 0.48       | 0.88        | 1.23       | 11-886                                                                                    | 10         | 12-503 | 2.5        | 12-524   | 43.75      | 11350000 | 43.75      |          |            |          |            |        |            |        |            |        |            |         |             |         |             |
| sauce_white_semi        | 3.68                                     | 2.28       | 0.90        | 0.13       | 11-886                                                                                    | 10         | 17-685 | 2.5        | 12-313   | 87.5       |          |            |          |            |          |            |        |            |        |            |        |            |         |             |         |             |
| sauce_white_skimmed     | 2.46                                     | 1.46       | 0.60        | 0.10       | 11-886                                                                                    | 10         | 17-685 | 2.5        | 12-307   | 87.5       |          |            |          |            |          |            |        |            |        |            |        |            |         |             |         |             |
| sauce_white_soya_ca     | 3.02                                     | 0.58       | 0.75        | 1.62       | 11-886                                                                                    | 10         | 12-503 | 2.5        | 12-524   | 87.5       |          |            |          |            |          |            |        |            |        |            |        |            |         |             |         |             |
| sauce_white_soya_noca   | 3.02                                     | 0.58       | 0.75        | 1.62       | 11-886                                                                                    | 10         | 12-503 | 2.5        | 12-524   | 87.5       |          |            |          |            |          |            |        |            |        |            |        |            |         |             |         |             |
| sauce_white_whole       | 5.35                                     | 3.35       | 1.39        | 0.17       | 11-886                                                                                    | 10         | 17-685 | 2.5        | 12-596   | 87.5       |          |            |          |            |          |            |        |            |        |            |        |            |         |             |         |             |
| scone                   | 12.30                                    | 6.37       | 3.54        | 1.19       | 11-827                                                                                    | 100        |        |            |          |            |          |            |          |            |          |            |        |            |        |            |        |            |         |             |         |             |
| scone_gf                | 12.30                                    | 6.37       | 3.54        | 1.19       | 11-827                                                                                    | 100        |        |            |          |            |          |            |          |            |          |            |        |            |        |            |        |            |         |             |         |             |
| single_crust            | 36.02                                    | 14.83      | 14.40       | 4.94       | 11-854                                                                                    | 40         | 11-853 | 60         |          |            |          |            |          |            |          |            |        |            |        |            |        |            |         |             |         |             |
| smoothie_dairy          | 0.73                                     | 0.43       | 0.16        | 0.02       | 12-379                                                                                    | 25         | 12-313 | 25         | 17-747   | 50         |          |            |          |            |          |            |        |            |        |            |        |            |         |             |         |             |
| smoothie_fruit          | 0.10                                     | 0.00       | 0.00        | 0.00       | 17-747                                                                                    | 100        |        |            |          |            |          |            |          |            |          |            |        |            |        |            |        |            |         |             |         |             |
| snack_cheesybis         | 28.10                                    | 11.67      | 12.20       | 2.62       | 11-821                                                                                    | 100        |        |            |          |            |          |            |          |            |          |            |        |            |        |            |        |            |         |             |         |             |
| snack_crisps            | 30.65                                    | 3.21       | 17.30       | 9.33       | 21201015                                                                                  | 50         | 17-643 | 25         | 17-644   | 25         |          |            |          |            |          |            |        |            |        |            |        |            |         |             |         |             |
| snack_olives            | 12.07                                    | 1.60       | 8.92        | 1.03       | 25510000                                                                                  | 100        |        |            |          |            |          |            |          |            |          |            |        |            |        |            |        |            |         |             |         |             |
| snack_saltednuts        | 48.33                                    | 7.05       | 29.13       | 9.90       | 42104200                                                                                  | 50         | 14-870 | 25         | 42114130 | 25         |          |            |          |            |          |            |        |            |        |            |        |            |         |             |         |             |
| snack_saltedpeanuts     | 46.00                                    | 8.66       | 22.03       | 13.10      | 14-877                                                                                    | 100        |        |            |          |            |          |            |          |            |          |            |        |            |        |            |        |            |         |             |         |             |
| snack_savourybis        | 20.83                                    | 1.90       | 12.38       | 5.19       | 17-645                                                                                    | 67         | 11-822 | 33         |          |            |          |            |          |            |          |            |        |            |        |            |        |            |         |             |         |             |
| snack_seeds             | 49.55                                    | 7.72       | 13.63       | 25.75      | 14-844                                                                                    | 25         | 14-845 | 25         | 13-849   | 25         | 14-842   | 25         |          |            |          |            |        |            |        |            |        |            |         |             |         |             |
| snack_svyother          | 27.99                                    | 3.91       | 13.95       | 9.04       | 17-764                                                                                    | 10         | 17-645 | 40         | 21201015 | 30         | 11-826   | 20         |          |            |          |            |        |            |        |            |        |            |         |             |         |             |
| snack_swtother          | 26.26                                    | 12.79      | 9.59        | 2.49       | 11-819                                                                                    | 10         | 11-810 | 30         | 11-815   | 30         | 17-648   | 20         | 17-645   | 10         |          |            |        |            |        |            |        |            |         |             |         |             |
| snack_unsaltednuts      | 53.87                                    | 6.63       | 24.96       | 19.63      | 42104200                                                                                  | 25         | 14-879 | 25         | 42114130 | 25         | 14-870   | 25         |          |            |          |            |        |            |        |            |        |            |         |             |         |             |
| snack_unsaltedpeanuts   | 46.00                                    | 8.66       | 22.03       | 13.10      | 14-877                                                                                    | 100        |        |            |          |            |          |            |          |            |          |            |        |            |        |            |        |            |         |             |         |             |
| snackpot                | 2.87                                     | 1.60       | 0.80        | 0.29       | 11-734                                                                                    | 25         | 17-377 | 73         | 17-685   | 2          |          |            |          |            |          |            |        |            |        |            |        |            |         |             |         |             |
| soup_canned_fish        | 5.88                                     | 3.48       | 1.43        | 0.34       | 16-373                                                                                    | 12.5       | 16-263 | 6.25       | 16-384   | 6.25       | 16-390   | 12.5       | 17-377   | 20         | 13-530   | 20         | 13-489 | 16         |        |            |        |            |         |             |         |             |





Table S1. Individual FA and major nutrient calculation in the individual FA dataset (MCW + USDA). USDA food codes are highlighted in red.

| Food item                     | Grams per 100g of food item <sup>1</sup> |            |             |             | Codes for foods from MCW and USDA and the fraction (%) assigned to each code <sup>2</sup> |            |          |            |        |            |        |            |        |            |        |            |        |            |        |            |        |            |         |             |         |             |
|-------------------------------|------------------------------------------|------------|-------------|-------------|-------------------------------------------------------------------------------------------|------------|----------|------------|--------|------------|--------|------------|--------|------------|--------|------------|--------|------------|--------|------------|--------|------------|---------|-------------|---------|-------------|
|                               | Total fat                                | Total SFAs | Total MUFAs | Total PUFAs | Code 1                                                                                    | Fraction 1 | Code 2   | Fraction 2 | Code 3 | Fraction 3 | Code 4 | Fraction 4 | Code 5 | Fraction 5 | Code 6 | Fraction 6 | Code 7 | Fraction 7 | Code 8 | Fraction 8 | Code 9 | Fraction 9 | Code 10 | Fraction 10 | Code 11 | Fraction 11 |
| veg_leek_spread_dunno_chol    | 0.67                                     | 0.14       | 0.18        | 0.26        | 13-625                                                                                    | 98.75      | 12-499   | 0.625      | 12-497 | 0.625      |        |            |        |            |        |            |        |            |        |            |        |            |         |             |         |             |
| veg_leek_spread_dunno_dunno   | 0.81                                     | 0.18       | 0.24        | 0.30        | 13-625                                                                                    | 98.75      | 12-499   | 0.3125     | 12-503 | 0.3125     | 12-497 | 0.3125     | 12-504 | 0.3125     |        |            |        |            |        |            |        |            |         |             |         |             |
| veg_leek_spread_dunno_fat     | 0.95                                     | 0.21       | 0.30        | 0.34        | 13-625                                                                                    | 98.75      | 12-503   | 0.625      | 12-504 | 0.625      |        |            |        |            |        |            |        |            |        |            |        |            |         |             |         |             |
| veg_leek_spread_dunno_lowfat  | 0.67                                     | 0.14       | 0.18        | 0.26        | 13-625                                                                                    | 98.75      | 12-497   | 0.625      | 12-499 | 0.625      |        |            |        |            |        |            |        |            |        |            |        |            |         |             |         |             |
| veg_leek_spread_dunno_vlowfat | 0.67                                     | 0.14       | 0.18        | 0.26        | 13-625                                                                                    | 98.75      | 12-497   | 0.625      | 12-499 | 0.625      |        |            |        |            |        |            |        |            |        |            |        |            |         |             |         |             |
| veg_leek_spread_olive_chol    | 0.68                                     | 0.14       | 0.27        | 0.19        | 13-625                                                                                    | 98.75      | 12-498   | 1.25       |        |            |        |            |        |            |        |            |        |            |        |            |        |            |         |             |         |             |
| veg_leek_spread_olive_dunno   | 0.81                                     | 0.17       | 0.33        | 0.22        | 13-625                                                                                    | 98.75      | 12-498   | 0.625      | 12-505 | 0.625      |        |            |        |            |        |            |        |            |        |            |        |            |         |             |         |             |
| veg_leek_spread_olive_fat     | 0.94                                     | 0.19       | 0.39        | 0.25        | 13-625                                                                                    | 98.75      | 12-505   | 1.25       |        |            |        |            |        |            |        |            |        |            |        |            |        |            |         |             |         |             |
| veg_leek_spread_olive_lowfat  | 0.68                                     | 0.14       | 0.27        | 0.19        | 13-625                                                                                    | 98.75      | 12-498   | 1.25       |        |            |        |            |        |            |        |            |        |            |        |            |        |            |         |             |         |             |
| veg_leek_spread_olive_vlowfat | 0.68                                     | 0.14       | 0.27        | 0.19        | 13-625                                                                                    | 98.75      | 12-498   | 1.25       |        |            |        |            |        |            |        |            |        |            |        |            |        |            |         |             |         |             |
| veg_lettuce                   | 0.10                                     | 0.03       | 0.00        | 0.08        | 13-520                                                                                    | 100        |          |            |        |            |        |            |        |            |        |            |        |            |        |            |        |            |         |             |         |             |
| veg_mixed                     | 0.50                                     | 0.00       | 0.00        | 0.00        | 13-543                                                                                    | 100        |          |            |        |            |        |            |        |            |        |            |        |            |        |            |        |            |         |             |         |             |
| veg_mush_butter_dunno         | 2.31                                     | 1.16       | 0.63        | 0.33        | 13-506                                                                                    | 97.5       | 17-655   | 1.25       | 17-685 | 0.625      | 17-661 | 0.625      |        |            |        |            |        |            |        |            |        |            |         |             |         |             |
| veg_mush_butter_fat           | 2.35                                     | 1.38       | 0.52        | 0.24        | 13-506                                                                                    | 97.5       | 17-685   | 1.25       | 17-661 | 1.25       |        |            |        |            |        |            |        |            |        |            |        |            |         |             |         |             |
| veg_mush_butter_lowfat        | 1.80                                     | 0.72       | 0.57        | 0.36        | 13-506                                                                                    | 97.5       | 17-656   | 2.5        |        |            |        |            |        |            |        |            |        |            |        |            |        |            |         |             |         |             |
| veg_mush_butter_spread_fat    | 2.27                                     | 0.93       | 0.74        | 0.42        | 13-506                                                                                    | 97.5       | 17-655   | 2.5        |        |            |        |            |        |            |        |            |        |            |        |            |        |            |         |             |         |             |
| veg_mush_butter_spread_lowfat | 1.80                                     | 0.72       | 0.57        | 0.36        | 13-506                                                                                    | 97.5       | 17-656   | 2.5        |        |            |        |            |        |            |        |            |        |            |        |            |        |            |         |             |         |             |
| veg_mush_fat_dunno            | 2.79                                     | 0.24       | 1.48        | 0.90        | 13-506                                                                                    | 97.5       | 17-686   | 2.5        |        |            |        |            |        |            |        |            |        |            |        |            |        |            |         |             |         |             |
| veg_mush_fat_none             | 0.30                                     | 0.08       | 0.00        | 0.17        | 13-506                                                                                    | 100        |          |            |        |            |        |            |        |            |        |            |        |            |        |            |        |            |         |             |         |             |
| veg_mush_fat_other            | 2.77                                     | 1.48       | 0.83        | 0.24        | 13-506                                                                                    | 97.5       | 81204000 | 1.25       | 17-487 | 1.25       |        |            |        |            |        |            |        |            |        |            |        |            |         |             |         |             |
| veg_mush_lard                 | 2.77                                     | 1.09       | 1.09        | 0.42        | 13-506                                                                                    | 97.5       | 17-010   | 2.5        |        |            |        |            |        |            |        |            |        |            |        |            |        |            |         |             |         |             |
| veg_mush_marg_hard            | 2.20                                     | 0.74       | 0.85        | 0.47        | 13-506                                                                                    | 97.5       | 12-500   | 2.5        |        |            |        |            |        |            |        |            |        |            |        |            |        |            |         |             |         |             |
| veg_mush_marg_poly_chol       | 1.22                                     | 0.29       | 0.29        | 0.54        | 13-506                                                                                    | 97.5       | 12-499   | 2.5        |        |            |        |            |        |            |        |            |        |            |        |            |        |            |         |             |         |             |
| veg_mush_marg_poly_dunno      | 1.49                                     | 0.35       | 0.37        | 0.67        | 13-506                                                                                    | 97.5       | 12-499   | 1.25       | 12-503 | 1.25       |        |            |        |            |        |            |        |            |        |            |        |            |         |             |         |             |
| veg_mush_marg_poly_fat        | 1.77                                     | 0.41       | 0.44        | 0.80        | 13-506                                                                                    | 97.5       | 12-503   | 2.5        |        |            |        |            |        |            |        |            |        |            |        |            |        |            |         |             |         |             |
| veg_mush_marg_poly_lowfat     | 1.22                                     | 0.29       | 0.29        | 0.54        | 13-506                                                                                    | 97.5       | 12-499   | 2.5        |        |            |        |            |        |            |        |            |        |            |        |            |        |            |         |             |         |             |
| veg_mush_marg_poly_vlowfat    | 1.22                                     | 0.29       | 0.29        | 0.54        | 13-506                                                                                    | 97.5       | 12-499   | 2.5        |        |            |        |            |        |            |        |            |        |            |        |            |        |            |         |             |         |             |
| veg_mush_marg_soya_chol       | 1.22                                     | 0.29       | 0.29        | 0.54        | 13-506                                                                                    | 97.5       | 12-499   | 2.5        |        |            |        |            |        |            |        |            |        |            |        |            |        |            |         |             |         |             |
| veg_mush_marg_soya_dunno      | 1.49                                     | 0.35       | 0.37        | 0.67        | 13-506                                                                                    | 97.5       | 12-499   | 1.25       | 12-503 | 1.25       |        |            |        |            |        |            |        |            |        |            |        |            |         |             |         |             |
| veg_mush_marg_soya_fat        | 1.77                                     | 0.41       | 0.44        | 0.80        | 13-506                                                                                    | 97.5       | 12-503   | 2.5        |        |            |        |            |        |            |        |            |        |            |        |            |        |            |         |             |         |             |
| veg_mush_marg_soya_lowfat     | 1.22                                     | 0.29       | 0.29        | 0.54        | 13-506                                                                                    | 97.5       | 12-499   | 2.5        |        |            |        |            |        |            |        |            |        |            |        |            |        |            |         |             |         |             |
| veg_mush_marg_soya_vlowfat    | 1.22                                     | 0.29       | 0.29        | 0.54        | 13-506                                                                                    | 97.5       | 12-499   | 2.5        |        |            |        |            |        |            |        |            |        |            |        |            |        |            |         |             |         |             |
| veg_mush_oil_olive            | 2.79                                     | 0.44       | 1.83        | 0.37        | 13-506                                                                                    | 97.5       | 17-038   | 2.5        |        |            |        |            |        |            |        |            |        |            |        |            |        |            |         |             |         |             |
| veg_mush_oil_other            | 2.48                                     | 0.35       | 1.00        | 0.98        | 13-506                                                                                    | 97.5       | 17-033   | 0.75       | 17-040 | 0.5        | 17-686 | 0.938      | 17-377 | 0.312      |        |            |        |            |        |            |        |            |         |             |         |             |
| veg_mush_oil_rapeseed         | 2.79                                     | 0.24       | 1.48        | 0.90        | 13-506                                                                                    | 97.5       | 17-041   | 2.5        |        |            |        |            |        |            |        |            |        |            |        |            |        |            |         |             |         |             |
| veg_mush_oil_sunflower        | 2.79                                     | 0.38       | 0.51        | 1.75        | 13-506                                                                                    | 97.5       | 17-045   | 2.5        |        |            |        |            |        |            |        |            |        |            |        |            |        |            |         |             |         |             |
| veg_mush_oil_veg              | 2.79                                     | 0.24       | 1.48        | 0.90        | 13-506                                                                                    | 97.5       | 17-686   | 2.5        |        |            |        |            |        |            |        |            |        |            |        |            |        |            |         |             |         |             |
| veg_mush_s_dairy_chol         | 1.27                                     | 0.32       | 0.43        | 0.41        | 13-506                                                                                    | 97.5       | 12-497   | 2.5        |        |            |        |            |        |            |        |            |        |            |        |            |        |            |         |             |         |             |
| veg_mush_s_dairy_dunno        | 1.54                                     | 0.40       | 0.59        | 0.44        | 13-506                                                                                    | 97.5       | 12-497   | 1.25       | 12-504 | 1.25       |        |            |        |            |        |            |        |            |        |            |        |            |         |             |         |             |
| veg_mush_s_dairy_fat          | 1.81                                     | 0.47       | 0.75        | 0.46        | 13-506                                                                                    | 97.5       | 12-504   | 2.5        |        |            |        |            |        |            |        |            |        |            |        |            |        |            |         |             |         |             |
| veg_mush_s_dairy_lowfat       | 1.27                                     | 0.32       | 0.43        | 0.41        | 13-506                                                                                    | 97.5       | 12-497   | 2.5        |        |            |        |            |        |            |        |            |        |            |        |            |        |            |         |             |         |             |
| veg_mush_s_dairy_vlowfat      | 1.27                                     | 0.32       | 0.43        | 0.41        | 13-506                                                                                    | 97.5       | 12-497   | 2.5        |        |            |        |            |        |            |        |            |        |            |        |            |        |            |         |             |         |             |
| veg_mush_s_dunno_chol         | 1.24                                     | 0.31       | 0.36        | 0.48        | 13-506                                                                                    | 97.5       | 12-499   | 1.25       | 12-497 | 1.25       |        |            |        |            |        |            |        |            |        |            |        |            |         |             |         |             |
| veg_mush_s_dunno_dunno        | 1.52                                     | 0.37       | 0.48        | 0.55        | 13-506                                                                                    | 97.5       | 12-499   | 0.625      | 12-503 | 0.625      | 12-497 | 0.625      | 12-504 | 0.625      |        |            |        |            |        |            |        |            |         |             |         |             |
| veg_mush_s_dunno_fat          | 1.79                                     | 0.44       | 0.60        | 0.63        | 13-506                                                                                    | 97.5       | 12-503   | 1.25       | 12-504 | 1.25       |        |            |        |            |        |            |        |            |        |            |        |            |         |             |         |             |
| veg_mush_s_dunno_lowfat       | 1.24                                     | 0.31       | 0.36        | 0.48        | 13-506                                                                                    | 97.5       | 12-499   | 1.25       | 12-497 | 1.25       |        |            |        |            |        |            |        |            |        |            |        |            |         |             |         |             |
| veg_mush_s_dunno_vlowfat      | 1.24                                     | 0.31       | 0.36        | 0.48        | 13-506                                                                                    | 97.5       | 12-499   | 1.25       | 12-497 | 1.25       |        |            |        |            |        |            |        |            |        |            |        |            |         |             |         |             |
| veg_mush_s_olive_chol         | 1.27                                     | 0.30       | 0.54        | 0.32        | 13-506                                                                                    | 97.5       | 12-498   | 2.5        |        |            |        |            |        |            |        |            |        |            |        |            |        |            |         |             |         |             |
| veg_mush_s_olive_dunno        | 1.52                                     | 0.35       | 0.66        | 0.39        | 13-506                                                                                    | 97.5       | 12-498   | 1.25       | 12-505 | 1.25       |        |            |        |            |        |            |        |            |        |            |        |            |         |             |         |             |
| veg_mush_s_olive_fat          | 1.77                                     | 0.41       | 0.78        | 0.45        | 13-506                                                                                    | 97.5       | 12-505   | 2.5        |        |            |        |            |        |            |        |            |        |            |        |            |        |            |         |             |         |             |
| veg_mush_s_olive_lowfat       | 1.27                                     | 0.30       | 0.54        | 0.32        | 13-506                                                                                    | 97.5       | 12-498   | 2.5        |        |            |        |            |        |            |        |            |        |            |        |            |        |            |         |             |         |             |
| veg_mush_s_olive_vlowfat      | 1.27                                     | 0.30       | 0.54        | 0.32        | 13-506                                                                                    | 97.5       | 12-498   | 2.5        |        |            |        |            |        |            |        |            |        |            |        |            |        |            |         |             |         |             |
| veg_mxtr_butter_dunno         | 4.51                                     | 2.16       | 1.26        | 0.32        | 13-543                                                                                    | 95         | 17-655   | 2.5        | 17-685 | 1.25       | 17-661 | 1.25       |        |            |        |            |        |            |        |            |        |            |         |             |         |             |
| veg_mxtr_butter_fat           | 4.59                                     | 2.60       | 1.05        | 0.14        | 13-543                                                                                    | 95         | 17-685   | 2.5        | 17-661 | 2.5        |        |            |        |            |        |            |        |            |        |            |        |            |         |             |         |             |
|                               |                                          |            |             |             |                                                                                           |            |          |            |        |            |        |            |        |            |        |            |        |            |        |            |        |            |         |             |         |             |

Table S1. Individual FA and major nutrient calculation in the individual FA dataset (MCW + USDA). USDA food codes are highlighted in red.

| Food item                      | Grams per 100g of food item <sup>1</sup> |            |             |             | Codes for foods from MCW and USDA and the fraction (%) assigned to each code <sup>2</sup> |            |        |            |          |            |        |            |        |            |        |            |         |            |        |            |        |            |         |             |         |
|--------------------------------|------------------------------------------|------------|-------------|-------------|-------------------------------------------------------------------------------------------|------------|--------|------------|----------|------------|--------|------------|--------|------------|--------|------------|---------|------------|--------|------------|--------|------------|---------|-------------|---------|
|                                | Total fat                                | Total SFAs | Total MUFAs | Total PUFAs | Code 1                                                                                    | Fraction 1 | Code 2 | Fraction 2 | Code 3   | Fraction 3 | Code 4 | Fraction 4 | Code 5 | Fraction 5 | Code 6 | Fraction 6 | Code 7  | Fraction 7 | Code 8 | Fraction 8 | Code 9 | Fraction 9 | Code 10 | Fraction 10 | Code 11 |
| veg_mxtr_oil_sunflower         | 5.47                                     | 0.60       | 1.03        | 3.17        | 13-543                                                                                    | 95         | 17-045 | 5          |          |            |        |            |        |            |        |            |         |            |        |            |        |            |         |             |         |
| veg_mxtr_oil_veg               | 5.47                                     | 0.33       | 2.97        | 1.47        | 13-543                                                                                    | 95         | 17-686 | 5          |          |            |        |            |        |            |        |            |         |            |        |            |        |            |         |             |         |
| veg_mxtr_s_dairy_chol          | 2.43                                     | 0.49       | 0.87        | 0.49        | 13-543                                                                                    | 95         | 12-497 | 5          |          |            |        |            |        |            |        |            |         |            |        |            |        |            |         |             |         |
| veg_mxtr_s_dairy_dunno         | 2.97                                     | 0.63       | 1.18        | 0.54        | 13-543                                                                                    | 95         | 12-497 | 2.5        | 12-504   | 2.5        |        |            |        |            |        |            |         |            |        |            |        |            |         |             |         |
| veg_mxtr_s_dairy_fat           | 3.51                                     | 0.78       | 1.50        | 0.60        | 13-543                                                                                    | 95         | 12-504 | 5          |          |            |        |            |        |            |        |            |         |            |        |            |        |            |         |             |         |
| veg_mxtr_s_dairy_lowfat        | 2.43                                     | 0.49       | 0.87        | 0.49        | 13-543                                                                                    | 95         | 12-497 | 5          |          |            |        |            |        |            |        |            |         |            |        |            |        |            |         |             |         |
| veg_mxtr_s_dairy_vlowfat       | 2.43                                     | 0.49       | 0.87        | 0.49        | 13-543                                                                                    | 95         | 12-497 | 5          |          |            |        |            |        |            |        |            |         |            |        |            |        |            |         |             |         |
| veg_mxtr_s_dunno_chol          | 2.37                                     | 0.46       | 0.72        | 0.62        | 13-543                                                                                    | 95         | 12-499 | 2.5        | 12-497   | 2.5        |        |            |        |            |        |            |         |            |        |            |        |            |         |             |         |
| veg_mxtr_s_dunno_dunno         | 2.92                                     | 0.59       | 0.96        | 0.77        | 13-543                                                                                    | 95         | 12-499 | 1.25       | 12-503   | 1.25       | 12-497 | 1.25       | 12-504 | 1.25       |        |            |         |            |        |            |        |            |         |             |         |
| veg_mxtr_s_dunno_fat           | 3.47                                     | 0.72       | 1.19        | 0.93        | 13-543                                                                                    | 95         | 12-503 | 2.5        | 12-504   | 2.5        |        |            |        |            |        |            |         |            |        |            |        |            |         |             |         |
| veg_mxtr_s_dunno_lowfat        | 2.37                                     | 0.46       | 0.72        | 0.62        | 13-543                                                                                    | 95         | 12-497 | 2.5        | 12-499   | 2.5        |        |            |        |            |        |            |         |            |        |            |        |            |         |             |         |
| veg_mxtr_s_dunno_vlowfat       | 2.37                                     | 0.46       | 0.72        | 0.62        | 13-543                                                                                    | 95         | 12-497 | 2.5        | 12-499   | 2.5        |        |            |        |            |        |            |         |            |        |            |        |            |         |             |         |
| veg_mxtr_s_olive_chol          | 2.42                                     | 0.45       | 1.08        | 0.32        | 13-543                                                                                    | 95         | 12-498 | 5          |          |            |        |            |        |            |        |            |         |            |        |            |        |            |         |             |         |
| veg_mxtr_s_olive_dunno         | 2.93                                     | 0.55       | 1.33        | 0.45        | 13-543                                                                                    | 95         | 12-498 | 2.5        | 12-505   | 2.5        |        |            |        |            |        |            |         |            |        |            |        |            |         |             |         |
| veg_mxtr_s_olive_fat           | 3.43                                     | 0.66       | 1.57        | 0.58        | 13-543                                                                                    | 95         | 12-505 | 5          |          |            |        |            |        |            |        |            |         |            |        |            |        |            |         |             |         |
| veg_mxtr_s_olive_lowfat        | 2.42                                     | 0.45       | 1.08        | 0.32        | 13-543                                                                                    | 95         | 12-498 | 5          |          |            |        |            |        |            |        |            |         |            |        |            |        |            |         |             |         |
| veg_mxtr_s_olive_vlowfat       | 2.42                                     | 0.45       | 1.08        | 0.32        | 13-543                                                                                    | 95         | 12-498 | 5          |          |            |        |            |        |            |        |            |         |            |        |            |        |            |         |             |         |
| veg_onion_butter_dunno         | 2.19                                     | 1.08       | 0.63        | 0.24        | 13-499                                                                                    | 20         | 13-589 | 77.5       | 17-655   | 1.25       | 17-685 | 0.625      | 17-661 | 0.625      |        |            |         |            |        |            |        |            |         |             |         |
| veg_onion_butter_fat           | 2.23                                     | 1.30       | 0.52        | 0.15        | 13-499                                                                                    | 20         | 13-589 | 77.5       | 17-685   | 1.25       | 17-661 | 1.25       |        |            |        |            |         |            |        |            |        |            |         |             |         |
| veg_onion_butter_lowfat        | 1.68                                     | 0.64       | 0.57        | 0.28        | 13-499                                                                                    | 20         | 13-589 | 77.5       | 17-656   | 2.5        |        |            |        |            |        |            |         |            |        |            |        |            |         |             |         |
| veg_onion_butter_spread_fat    | 2.15                                     | 0.85       | 0.74        | 0.33        | 13-499                                                                                    | 20         | 13-589 | 77.5       | 17-655   | 2.5        |        |            |        |            |        |            |         |            |        |            |        |            |         |             |         |
| veg_onion_butter_spread_lowfat | 1.68                                     | 0.64       | 0.57        | 0.28        | 13-499                                                                                    | 20         | 13-589 | 77.5       | 17-656   | 2.5        |        |            |        |            |        |            |         |            |        |            |        |            |         |             |         |
| veg_onion_fat_dunno            | 2.67                                     | 0.17       | 1.48        | 0.82        | 13-499                                                                                    | 20         | 13-589 | 77.5       | 17-686   | 2.5        |        |            |        |            |        |            |         |            |        |            |        |            |         |             |         |
| veg_onion_fat_none             | 0.18                                     | 0.00       | 0.00        | 0.09        | 13-499                                                                                    | 20         | 13-589 | 80         |          |            |        |            |        |            |        |            |         |            |        |            |        |            |         |             |         |
| veg_onion_fat_other            | 2.66                                     | 1.41       | 0.83        | 0.16        | 13-499                                                                                    | 20         | 13-589 | 77.5       | 81204000 | 1.25       | 17-487 | 1.25       |        |            |        |            |         |            |        |            |        |            |         |             |         |
| veg_onion_lard                 | 2.65                                     | 1.01       | 1.09        | 0.33        | 13-499                                                                                    | 20         | 13-589 | 77.5       | 17-010   | 2.5        |        |            |        |            |        |            |         |            |        |            |        |            |         |             |         |
| veg_onion_marg_hard            | 2.09                                     | 0.66       | 0.85        | 0.39        | 13-499                                                                                    | 20         | 13-589 | 77.5       | 12-500   | 2.5        |        |            |        |            |        |            |         |            |        |            |        |            |         |             |         |
| veg_onion_marg_poly_chol       | 1.10                                     | 0.21       | 0.29        | 0.46        | 13-499                                                                                    | 20         | 13-589 | 77.5       | 12-499   | 2.5        |        |            |        |            |        |            |         |            |        |            |        |            |         |             |         |
| veg_onion_marg_poly_dunno      | 1.38                                     | 0.27       | 0.37        | 0.59        | 13-499                                                                                    | 20         | 13-589 | 77.5       | 12-499   | 1.25       | 12-503 | 1.25       |        |            |        |            |         |            |        |            |        |            |         |             |         |
| veg_onion_marg_poly_fat        | 1.66                                     | 0.33       | 0.44        | 0.71        | 13-499                                                                                    | 20         | 13-589 | 77.5       | 12-503   | 2.5        |        |            |        |            |        |            |         |            |        |            |        |            |         |             |         |
| veg_onion_marg_poly_lowfat     | 1.10                                     | 0.21       | 0.29        | 0.46        | 13-499                                                                                    | 20         | 13-589 | 77.5       | 12-499   | 2.5        |        |            |        |            |        |            |         |            |        |            |        |            |         |             |         |
| veg_onion_marg_poly_vlowfat    | 1.10                                     | 0.21       | 0.29        | 0.46        | 13-499                                                                                    | 20         | 13-589 | 77.5       | 12-499   | 2.5        |        |            |        |            |        |            |         |            |        |            |        |            |         |             |         |
| veg_onion_marg_soya_chol       | 1.10                                     | 0.21       | 0.29        | 0.46        | 13-499                                                                                    | 20         | 13-589 | 77.5       | 12-499   | 2.5        |        |            |        |            |        |            |         |            |        |            |        |            |         |             |         |
| veg_onion_marg_soya_dunno      | 1.38                                     | 0.27       | 0.37        | 0.59        | 13-499                                                                                    | 20         | 13-589 | 77.5       | 12-499   | 1.25       | 12-503 | 1.25       |        |            |        |            |         |            |        |            |        |            |         |             |         |
| veg_onion_marg_soya_fat        | 1.66                                     | 0.33       | 0.44        | 0.71        | 13-499                                                                                    | 20         | 13-589 | 77.5       | 12-503   | 2.5        |        |            |        |            |        |            |         |            |        |            |        |            |         |             |         |
| veg_onion_marg_soya_lowfat     | 1.10                                     | 0.21       | 0.29        | 0.46        | 13-499                                                                                    | 20         | 13-589 | 77.5       | 12-499   | 2.5        |        |            |        |            |        |            |         |            |        |            |        |            |         |             |         |
| veg_onion_marg_soya_vlowfat    | 1.10                                     | 0.21       | 0.29        | 0.46        | 13-499                                                                                    | 20         | 13-589 | 77.5       | 12-499   | 2.5        |        |            |        |            |        |            |         |            |        |            |        |            |         |             |         |
| veg_onion_oil_olive            | 2.67                                     | 0.36       | 1.83        | 0.29        | 13-499                                                                                    | 20         | 13-589 | 77.5       | 17-038   | 2.5        |        |            |        |            |        |            |         |            |        |            |        |            |         |             |         |
| veg_onion_oil_other            | 2.36                                     | 0.27       | 1.00        | 0.90        | 13-499                                                                                    | 20         | 13-589 | 77.5       | 17-033   | 0.75       | 17-040 | 0.5        | 17-686 | 0.938      | 17-377 | 0.312      |         |            |        |            |        |            |         |             |         |
| veg_onion_oil_rapeseed         | 2.67                                     | 0.17       | 1.48        | 0.82        | 13-499                                                                                    | 20         | 13-589 | 77.5       | 17-041   | 2.5        |        |            |        |            |        |            |         |            |        |            |        |            |         |             |         |
| veg_onion_oil_sunflower        | 2.67                                     | 0.30       | 0.51        | 1.67        | 13-499                                                                                    | 20         | 13-589 | 77.5       | 17-045   | 2.5        |        |            |        |            |        |            |         |            |        |            |        |            |         |             |         |
| veg_onion_oil_veg              | 2.67                                     | 0.17       | 1.48        | 0.82        | 13-499                                                                                    | 20         | 13-589 | 77.5       | 17-686   | 2.5        |        |            |        |            |        |            |         |            |        |            |        |            |         |             |         |
| veg_onion_spread_dairy_chol    | 1.15                                     | 0.24       | 0.43        | 0.33        | 13-499                                                                                    | 20         | 13-589 | 77.5       | 12-497   | 2.5        |        |            |        |            |        |            |         |            |        |            |        |            |         |             |         |
| veg_onion_spread_dairy_dunno   | 1.42                                     | 0.32       | 0.59        | 0.36        | 13-499                                                                                    | 20         | 13-589 | 77.5       | 12-497   | 1.25       | 12-504 | 1.25       |        |            |        |            |         |            |        |            |        |            |         |             |         |
| veg_onion_spread_dairy_fat     | 1.69                                     | 0.39       | 0.75        | 0.38        | 13-499                                                                                    | 20         | 13-589 | 77.5       | 12-504   | 2.5        |        |            |        |            |        |            |         |            |        |            |        |            |         |             |         |
| veg_onion_spread_dairy_lowfat  | 1.15                                     | 0.24       | 0.43        | 0.33        | 13-499                                                                                    | 20         | 13-589 | 77.5       | 12-497   | 2.5        |        |            |        |            |        |            |         |            |        |            |        |            |         |             |         |
| veg_onion_spread_dairy_vlowfat | 1.15                                     | 0.24       | 0.43        | 0.33        | 13-499                                                                                    | 20         | 13-589 | 77.5       | 12-497   | 2.5        |        |            |        |            |        |            |         |            |        |            |        |            |         |             |         |
| veg_onion_spread_dunno_chol    | 1.12                                     | 0.23       | 0.36        | 0.39        | 13-499                                                                                    | 20         | 13-589 | 77.5       | 12-499   | 1.25       | 12-497 | 1.25       |        |            |        |            |         |            |        |            |        |            |         |             |         |
| veg_onion_spread_dunno_dunno   | 1.40                                     | 0.29       | 0.48        | 0.47        | 13-499                                                                                    | 20         | 13-589 | 77.5       | 12-499   | 0.625      | 12-503 | 0.625      | 12-497 | 0.625      | 12-504 | 0.625      |         |            |        |            |        |            |         |             |         |
| veg_onion_spread_dunno_fat     | 1.67                                     | 0.36       | 0.60        | 0.55        | 13-499                                                                                    | 20         | 13-589 | 77.5       | 12-503   | 1.25       | 12-504 | 1.25       |        |            |        |            |         |            |        |            |        |            |         |             |         |
| veg_onion_spread_dunno_lowfat  | 1.12                                     | 0.23       | 0.36        | 0.39        | 13-499                                                                                    | 20         | 13-589 | 77.5       | 12-499   | 1.25       | 12-497 | 1.25       |        |            |        |            |         |            |        |            |        |            |         |             |         |
| veg_onion_spread_dunno_vlowfat | 1.12                                     | 0.23       | 0.36        | 0.39        | 13-499                                                                                    | 20         | 13-589 | 77.5       | 12-499   | 1.25       | 12-497 | 1.25       |        |            |        |            |         |            |        |            |        |            |         |             |         |
| veg_onion_spread_olive_chol    | 1.15                                     | 0.22       | 0.54        | 0.24        | 13-499                                                                                    | 20         | 13-589 | 77.5       | 12-498   | 2.5        |        |            |        |            |        |            |         |            |        |            |        |            |         |             |         |
| veg_onion_spread_olive_dunno   | 1.40                                     | 0.28       | 0.66        | 0.31        | 13-499                                                                                    | 20         | 13-589 | 77.5       | 12-498   | 1.25       | 12-505 | 1.25       |        |            |        |            |         |            |        |            |        |            |         |             |         |
| veg_onion_spread_olive_fat     | 1.65                                     | 0.33       | 0.78        | 0.37        | 13-499                                                                                    | 20         | 13-589 | 77.5       | 12-505   | 2.5        |        |            |        |            |        |            |         |            |        |            |        |            |         |             |         |
| veg_onion_spread_olive_lowfat  | 1.15                                     | 0.22       | 0.54        | 0.24        | 13-499                                                                                    | 20         | 13-589 | 77.5       | 12-498   | 2.5        |        |            |        |            |        |            |         |            |        |            |        |            |         |             |         |
| veg_onion_spread_olive_vlowfat | 1.15                                     | 0.22       | 0.54        | 0.24        | 13-499                                                                                    | 20         | 13-589 | 77.5       | 12-498   | 2.5        |        |            |        |            |        |            |         |            |        |            |        |            |         |             |         |
| veg_other_butter_dunno         | 2.80                                     | 1.36       | 0.80        | 0.34        | 13-542                                                                                    | 5          | 13-638 | 42.5       | 13-549   | 5          | 13-585 | 5          | 13-161 | 34.5       | 13-656 | 5          | 17-655  | 1.5        | 17-685 | 0.75       | 17-661 | 0.75       |         |             |         |
| veg_other_butter_fat           | 2.84                                     | 1.63       | 0.67        | 0.23        | 13-542                                                                                    | 5          | 13-638 | 42.5       | 13-549   | 5          | 13-585 | 5          | 13-161 | 34.5       | 13-656 | 5          | 17-655  | 1.5        | 17-661 | 1.5        |        |            |         |             |         |
| veg_other_butter_lowfat        | 2.18                                     | 0.84       | 0.72        | 0.38        | 13-542                                                                                    | 5          | 13-638 | 42.5       | 13-549   | 5          | 13-585 | 5          | 13-161 | 34.5       | 13-656 | 5          | 17-656  | 3          |        |            |        |            |         |             |         |
| veg_other_butter_spread_fat    | 2.18                                     | 0.84       | 0.72        | 0.38        | 13-542                                                                                    | 5          | 13-638 | 42.5       | 13-549   | 5          | 13-585 | 5          | 13-161 | 34.5       | 13-656 | 5          | 17-656  | 3          |        |            |        |            |         |             |         |
| veg_other_butter_spread_lowfat | 2.75                                     | 1.10       | 0.93        | 0.44        | 13-542                                                                                    | 5          | 13-638 | 42.5       | 13-549   | 5          | 13-585 | 5          | 13-161 | 34.5       | 13-656 | 5          | 17-655  | 3          |        |            |        |            |         |             |         |
| veg_other_fat_dunno            | 3.38                                     | 0.27       | 1.82        | 1.02        | 13-542                                                                                    | 5          | 13-638 | 42.5       | 13-549   | 5          | 13-585 | 5          | 13-161 | 34.5       | 13-656 | 5          | 17-686  | 3          |        |            |        |            |         |             |         |
| veg_other_fat_none             | 0.39                                     | 0.07       | 0.04        | 0.15        | 13-542                                                                                    | 5          | 13-638 | 44         | 13-549   | 5          | 13-585 | 5          | 13-161 | 36         | 13-656 | 5          |         |            |        |            |        |            |         |             |         |
| veg_other_fat_other            | 3.36                                     | 1.76       | 1.04        | 0.23        | 13-542                                                                                    | 5          | 13-638 | 42.5       | 13-549   | 5          | 13-585 | 5          | 13-161 | 34.5       | 13-656 | 5          | 8124000 | 1.5        | 17-487 | 1.5        |        |            |         |             |         |
| veg_other_lard                 | 3.35                                     | 1.28       | 1.34        | 0.44        | 13-542                                                                                    | 5          | 13-638 | 42.5       | 13-549   | 5          | 13-585 | 5          | 13-161 | 34.5       | 13-656 | 5          | 17-010  | 3          |        |            |        |            |         |             |         |
| veg_other_marg_hard            | 2.67                                     | 0.86       | 1.06        | 0.51        | 13-542                                                                                    | 5          | 13-638 | 42.5       | 13-549   | 5          | 13-585 | 5          | 13-161 |            |        |            |         |            |        |            |        |            |         |             |         |

Table S1. Individual FA and major nutrient calculation in the individual FA dataset (MCW + USDA). USDA food codes are highlighted in red.

| Food item                      | Grams per 100g of food item <sup>1</sup> |            |             |             | Codes for foods from MCW and USDA and the fraction (%) assigned to each code <sup>2</sup> |            |          |            |        |            |        |            |        |            |        |            |        |            |        |            |        |            |         |             |         |             |
|--------------------------------|------------------------------------------|------------|-------------|-------------|-------------------------------------------------------------------------------------------|------------|----------|------------|--------|------------|--------|------------|--------|------------|--------|------------|--------|------------|--------|------------|--------|------------|---------|-------------|---------|-------------|
|                                | Total fat                                | Total SFAs | Total MUFAs | Total PUFAs | Code 1                                                                                    | Fraction 1 | Code 2   | Fraction 2 | Code 3 | Fraction 3 | Code 4 | Fraction 4 | Code 5 | Fraction 5 | Code 6 | Fraction 6 | Code 7 | Fraction 7 | Code 8 | Fraction 8 | Code 9 | Fraction 9 | Code 10 | Fraction 10 | Code 11 | Fraction 11 |
| veg_other_marg_soya_lowfat     | 1.49                                     | 0.33       | 0.39        | 0.59        | 13-542                                                                                    | 5          | 13-638   | 42.5       | 13-549 | 5          | 13-585 | 5          | 13-161 | 34.5       | 13-656 | 5          | 12-499 | 3          |        |            |        |            |         |             |         |             |
| veg_other_marg_soya_vlowfat    | 1.49                                     | 0.33       | 0.39        | 0.59        | 13-542                                                                                    | 5          | 13-638   | 42.5       | 13-549 | 5          | 13-585 | 5          | 13-161 | 34.5       | 13-656 | 5          | 12-499 | 3          |        |            |        |            |         |             |         |             |
| veg_other_oil_olive            | 3.38                                     | 0.50       | 2.23        | 0.39        | 13-542                                                                                    | 5          | 13-638   | 42.5       | 13-549 | 5          | 13-585 | 5          | 13-161 | 34.5       | 13-656 | 5          | 17-038 | 3          |        |            |        |            |         |             |         |             |
| veg_other_oil_other            | 3.00                                     | 0.39       | 1.25        | 1.12        | 13-542                                                                                    | 5          | 13-638   | 42.5       | 13-549 | 5          | 13-585 | 5          | 13-161 | 34.5       | 13-656 | 5          | 17-033 | 0.9        | 17-040 | 0.6        | 17-686 | 0.75       | 17-686  | 0.375       | 17-377  | 0.375       |
| veg_other_oil_rapeseed         | 3.38                                     | 0.27       | 1.82        | 1.02        | 13-542                                                                                    | 5          | 13-638   | 42.5       | 13-549 | 5          | 13-585 | 5          | 13-161 | 34.5       | 13-656 | 5          | 17-041 | 3          |        |            |        |            |         |             |         |             |
| veg_other_oil_sunflower        | 3.38                                     | 0.43       | 0.66        | 2.04        | 13-542                                                                                    | 5          | 13-638   | 42.5       | 13-549 | 5          | 13-585 | 5          | 13-161 | 34.5       | 13-656 | 5          | 17-045 | 3          |        |            |        |            |         |             |         |             |
| veg_other_oil_veg              | 3.38                                     | 0.27       | 1.82        | 1.02        | 13-542                                                                                    | 5          | 13-638   | 42.5       | 13-549 | 5          | 13-585 | 5          | 13-161 | 34.5       | 13-656 | 5          | 17-686 | 3          |        |            |        |            |         |             |         |             |
| veg_other_spread_dairy_chol    | 1.55                                     | 0.36       | 0.56        | 0.44        | 13-542                                                                                    | 5          | 13-638   | 42.5       | 13-549 | 5          | 13-585 | 5          | 13-161 | 34.5       | 13-656 | 5          | 12-497 | 3          |        |            |        |            |         |             |         |             |
| veg_other_spread_dairy_dunno   | 1.87                                     | 0.45       | 0.75        | 0.47        | 13-542                                                                                    | 5          | 13-638   | 42.5       | 13-549 | 5          | 13-585 | 5          | 13-161 | 34.5       | 13-656 | 5          | 12-497 | 1.5        | 12-504 | 1.5        |        |            |         |             |         |             |
| veg_other_spread_dairy_fat     | 2.20                                     | 0.54       | 0.94        | 0.50        | 13-542                                                                                    | 5          | 13-638   | 42.5       | 13-549 | 5          | 13-585 | 5          | 13-161 | 34.5       | 13-656 | 5          | 12-504 | 3          |        |            |        |            |         |             |         |             |
| veg_other_spread_dairy_lowfat  | 1.55                                     | 0.36       | 0.56        | 0.44        | 13-542                                                                                    | 5          | 13-638   | 42.5       | 13-549 | 5          | 13-585 | 5          | 13-161 | 34.5       | 13-656 | 5          | 12-497 | 3          |        |            |        |            |         |             |         |             |
| veg_other_spread_dairy_vlowfat | 1.55                                     | 0.36       | 0.56        | 0.44        | 13-542                                                                                    | 5          | 13-638   | 42.5       | 13-549 | 5          | 13-585 | 5          | 13-161 | 34.5       | 13-656 | 5          | 12-497 | 3          |        |            |        |            |         |             |         |             |
| veg_other_spread_dunno_chol    | 1.52                                     | 0.35       | 0.48        | 0.51        | 13-542                                                                                    | 5          | 13-638   | 42.5       | 13-549 | 5          | 13-585 | 5          | 13-161 | 34.5       | 13-656 | 5          | 12-499 | 1.5        | 12-497 | 1.5        |        |            |         |             |         |             |
| veg_other_spread_dunno_dunno   | 1.85                                     | 0.42       | 0.62        | 0.61        | 13-542                                                                                    | 5          | 13-638   | 42.5       | 13-549 | 5          | 13-585 | 5          | 13-161 | 34.5       | 13-656 | 5          | 12-499 | 0.75       | 12-503 | 0.75       | 12-497 | 0.75       | 12-504  | 0.75        |         |             |
| veg_other_spread_dunno_fat     | 2.18                                     | 0.50       | 0.76        | 0.70        | 13-542                                                                                    | 5          | 13-638   | 42.5       | 13-549 | 5          | 13-585 | 5          | 13-161 | 34.5       | 13-656 | 5          | 12-503 | 1.5        | 12-504 | 1.5        |        |            |         |             |         |             |
| veg_other_spread_dunno_lowfat  | 1.52                                     | 0.35       | 0.48        | 0.51        | 13-542                                                                                    | 5          | 13-638   | 42.5       | 13-549 | 5          | 13-585 | 5          | 13-161 | 34.5       | 13-656 | 5          | 12-497 | 1.5        | 12-499 | 1.5        |        |            |         |             |         |             |
| veg_other_spread_dunno_vlowfat | 1.52                                     | 0.35       | 0.48        | 0.51        | 13-542                                                                                    | 5          | 13-638   | 42.5       | 13-549 | 5          | 13-585 | 5          | 13-161 | 34.5       | 13-656 | 5          | 12-497 | 1.5        | 12-499 | 1.5        |        |            |         |             |         |             |
| veg_other_spread_olive_chol    | 1.55                                     | 0.34       | 0.69        | 0.33        | 13-542                                                                                    | 5          | 13-638   | 42.5       | 13-549 | 5          | 13-585 | 5          | 13-161 | 34.5       | 13-656 | 5          | 12-498 | 3          |        |            |        |            |         |             |         |             |
| veg_other_spread_olive_dunno   | 1.85                                     | 0.40       | 0.84        | 0.41        | 13-542                                                                                    | 5          | 13-638   | 42.5       | 13-549 | 5          | 13-585 | 5          | 13-161 | 34.5       | 13-656 | 5          | 12-498 | 1.5        | 12-505 | 1.5        |        |            |         |             |         |             |
| veg_other_spread_olive_fat     | 2.15                                     | 0.47       | 0.98        | 0.49        | 13-542                                                                                    | 5          | 13-638   | 42.5       | 13-549 | 5          | 13-585 | 5          | 13-161 | 34.5       | 13-656 | 5          | 12-505 | 3          |        |            |        |            |         |             |         |             |
| veg_other_spread_olive_lowfat  | 1.55                                     | 0.34       | 0.69        | 0.33        | 13-542                                                                                    | 5          | 13-638   | 42.5       | 13-549 | 5          | 13-585 | 5          | 13-161 | 34.5       | 13-656 | 5          | 12-498 | 3          |        |            |        |            |         |             |         |             |
| veg_other_spread_olive_vlowfat | 1.55                                     | 0.34       | 0.69        | 0.33        | 13-542                                                                                    | 5          | 13-638   | 42.5       | 13-549 | 5          | 13-585 | 5          | 13-161 | 34.5       | 13-656 | 5          | 12-498 | 3          |        |            |        |            |         |             |         |             |
| veg_par_butter_dunno           | 2.31                                     | 1.13       | 0.74        | 0.21        | 75222010                                                                                  | 97.5       | 17-655   | 1.25       | 17-685 | 0.625      | 17-661 | 0.625      |        |            |        |            |        |            |        |            |        |            |         |             |         |             |
| veg_par_butter_fat             | 2.35                                     | 1.35       | 0.63        | 0.12        | 75222010                                                                                  | 97.5       | 17-685   | 1.25       | 17-661 | 1.25       |        |            |        |            |        |            |        |            |        |            |        |            |         |             |         |             |
| veg_par_butter_lowfat          | 1.80                                     | 0.69       | 0.67        | 0.24        | 75222010                                                                                  | 97.5       | 17-656   | 2.5        |        |            |        |            |        |            |        |            |        |            |        |            |        |            |         |             |         |             |
| veg_par_butter_spread_fat      | 2.27                                     | 0.90       | 0.85        | 0.30        | 75222010                                                                                  | 97.5       | 17-655   | 2.5        |        |            |        |            |        |            |        |            |        |            |        |            |        |            |         |             |         |             |
| veg_par_butter_spread_lowfat   | 1.80                                     | 0.69       | 0.67        | 0.24        | 75222010                                                                                  | 97.5       | 17-656   | 2.5        |        |            |        |            |        |            |        |            |        |            |        |            |        |            |         |             |         |             |
| veg_par_fat_dunno              | 2.79                                     | 0.21       | 1.59        | 0.78        | 75222010                                                                                  | 97.5       | 17-686   | 2.5        |        |            |        |            |        |            |        |            |        |            |        |            |        |            |         |             |         |             |
| veg_par_fat_none               | 0.30                                     | 0.05       | 0.11        | 0.05        | 75222010                                                                                  | 100        |          |            |        |            |        |            |        |            |        |            |        |            |        |            |        |            |         |             |         |             |
| veg_par_fat_other              | 2.77                                     | 1.46       | 0.94        | 0.12        | 75222010                                                                                  | 97.5       | 81204000 | 1.25       | 17-487 | 1.25       |        |            |        |            |        |            |        |            |        |            |        |            |         |             |         |             |
| veg_par_lard                   | 2.77                                     | 1.06       | 1.19        | 0.30        | 75222010                                                                                  | 97.5       | 17-010   | 2.5        |        |            |        |            |        |            |        |            |        |            |        |            |        |            |         |             |         |             |
| veg_par_marg_hard              | 2.20                                     | 0.71       | 0.96        | 0.35        | 75222010                                                                                  | 97.5       | 12-500   | 2.5        |        |            |        |            |        |            |        |            |        |            |        |            |        |            |         |             |         |             |
| veg_par_marg_poly_chol         | 1.22                                     | 0.26       | 0.40        | 0.42        | 75222010                                                                                  | 97.5       | 12-499   | 2.5        |        |            |        |            |        |            |        |            |        |            |        |            |        |            |         |             |         |             |
| veg_par_marg_poly_dunno        | 1.49                                     | 0.32       | 0.47        | 0.55        | 75222010                                                                                  | 97.5       | 12-499   | 1.25       | 12-503 | 1.25       |        |            |        |            |        |            |        |            |        |            |        |            |         |             |         |             |
| veg_par_marg_poly_fat          | 1.77                                     | 0.38       | 0.55        | 0.68        | 75222010                                                                                  | 97.5       | 12-503   | 2.5        |        |            |        |            |        |            |        |            |        |            |        |            |        |            |         |             |         |             |
| veg_par_marg_poly_lowfat       | 1.22                                     | 0.26       | 0.40        | 0.42        | 75222010                                                                                  | 97.5       | 12-499   | 2.5        |        |            |        |            |        |            |        |            |        |            |        |            |        |            |         |             |         |             |
| veg_par_marg_poly_vlowfat      | 1.22                                     | 0.26       | 0.40        | 0.42        | 75222010                                                                                  | 97.5       | 12-499   | 2.5        |        |            |        |            |        |            |        |            |        |            |        |            |        |            |         |             |         |             |
| veg_par_marg_soya_chol         | 1.22                                     | 0.26       | 0.40        | 0.42        | 75222010                                                                                  | 97.5       | 12-499   | 2.5        |        |            |        |            |        |            |        |            |        |            |        |            |        |            |         |             |         |             |
| veg_par_marg_soya_dunno        | 1.49                                     | 0.32       | 0.47        | 0.55        | 75222010                                                                                  | 97.5       | 12-499   | 1.25       | 12-503 | 1.25       |        |            |        |            |        |            |        |            |        |            |        |            |         |             |         |             |
| veg_par_marg_soya_fat          | 1.77                                     | 0.38       | 0.55        | 0.68        | 75222010                                                                                  | 97.5       | 12-503   | 2.5        |        |            |        |            |        |            |        |            |        |            |        |            |        |            |         |             |         |             |
| veg_par_marg_soya_lowfat       | 1.22                                     | 0.26       | 0.40        | 0.42        | 75222010                                                                                  | 97.5       | 12-499   | 2.5        |        |            |        |            |        |            |        |            |        |            |        |            |        |            |         |             |         |             |
| veg_par_marg_soya_vlowfat      | 1.22                                     | 0.26       | 0.40        | 0.42        | 75222010                                                                                  | 97.5       | 12-499   | 2.5        |        |            |        |            |        |            |        |            |        |            |        |            |        |            |         |             |         |             |
| veg_par_oil_olive              | 2.79                                     | 0.41       | 1.93        | 0.25        | 75222010                                                                                  | 97.5       | 17-038   | 2.5        |        |            |        |            |        |            |        |            |        |            |        |            |        |            |         |             |         |             |
| veg_par_oil_other              | 2.48                                     | 0.32       | 1.11        | 0.86        | 75222010                                                                                  | 97.5       | 17-033   | 0.75       | 17-040 | 0.5        | 17-686 | 0.938      | 17-377 | 0.312      |        |            |        |            |        |            |        |            |         |             |         |             |
| veg_par_oil_rapeseed           | 2.79                                     | 0.21       | 1.59        | 0.78        | 75222010                                                                                  | 97.5       | 17-041   | 2.5        |        |            |        |            |        |            |        |            |        |            |        |            |        |            |         |             |         |             |
| veg_par_oil_sunflower          | 2.79                                     | 0.35       | 0.62        | 1.63        | 75222010                                                                                  | 97.5       | 17-045   | 2.5        |        |            |        |            |        |            |        |            |        |            |        |            |        |            |         |             |         |             |
| veg_par_oil_veg                | 2.79                                     | 0.21       | 1.59        | 0.78        | 75222010                                                                                  | 97.5       | 17-686   | 2.5        |        |            |        |            |        |            |        |            |        |            |        |            |        |            |         |             |         |             |
| veg_par_s_dairy_chol           | 1.27                                     | 0.29       | 0.54        | 0.29        | 75222010                                                                                  | 97.5       | 12-497   | 2.5        |        |            |        |            |        |            |        |            |        |            |        |            |        |            |         |             |         |             |
| veg_par_s_dairy_dunno          | 1.54                                     | 0.37       | 0.70        | 0.32        |                                                                                           |            |          |            |        |            |        |            |        |            |        |            |        |            |        |            |        |            |         |             |         |             |

Table S1. Individual FA and major nutrient calculation in the individual FA dataset (MCW + USDA). USDA food codes are highlighted in red.

| Food item                  | Grams per 100g of food item <sup>1</sup> |            |             |             | Codes for foods from MCW and USDA and the fraction (%) assigned to each code <sup>2</sup> |            |          |            |          |            |          |            |        |            |        |            |        |            |        |            |          |            |         |             |         |             |  |
|----------------------------|------------------------------------------|------------|-------------|-------------|-------------------------------------------------------------------------------------------|------------|----------|------------|----------|------------|----------|------------|--------|------------|--------|------------|--------|------------|--------|------------|----------|------------|---------|-------------|---------|-------------|--|
|                            | Total fat                                | Total SFAs | Total MUFAs | Total PUFAs | Code 1                                                                                    | Fraction 1 | Code 2   | Fraction 2 | Code 3   | Fraction 3 | Code 4   | Fraction 4 | Code 5 | Fraction 5 | Code 6 | Fraction 6 | Code 7 | Fraction 7 | Code 8 | Fraction 8 | Code 9   | Fraction 9 | Code 10 | Fraction 10 | Code 11 | Fraction 11 |  |
| veg_pepp_marg_poly_fat     | 1.73                                     | 0.37       | 0.44        | 0.75        | 13-548                                                                                    | 19.5       | 13-524   | 19.5       | 13-526   | 19.5       | 13-525   | 19.5       | 13-537 | 19.5       | 12-503 | 2.5        |        |            |        |            |          |            |         |             |         |             |  |
| veg_pepp_marg_poly_lowfat  | 1.18                                     | 0.25       | 0.29        | 0.49        | 13-548                                                                                    | 19.5       | 13-524   | 19.5       | 13-526   | 19.5       | 13-525   | 19.5       | 13-537 | 19.5       | 12-499 | 2.5        |        |            |        |            |          |            |         |             |         |             |  |
| veg_pepp_marg_poly_vlowfat | 1.18                                     | 0.25       | 0.29        | 0.49        | 13-548                                                                                    | 19.5       | 13-524   | 19.5       | 13-526   | 19.5       | 13-525   | 19.5       | 13-537 | 19.5       | 12-499 | 2.5        |        |            |        |            |          |            |         |             |         |             |  |
| veg_pepp_marg_soya_chol    | 1.18                                     | 0.25       | 0.29        | 0.49        | 13-548                                                                                    | 19.5       | 13-524   | 19.5       | 13-526   | 19.5       | 13-525   | 19.5       | 13-537 | 19.5       | 12-499 | 2.5        |        |            |        |            |          |            |         |             |         |             |  |
| veg_pepp_marg_soya_dunno   | 1.45                                     | 0.31       | 0.37        | 0.62        | 13-548                                                                                    | 19.5       | 13-524   | 19.5       | 13-526   | 19.5       | 13-525   | 19.5       | 13-537 | 19.5       | 12-499 | 1.25       | 12-503 | 1.25       |        |            |          |            |         |             |         |             |  |
| veg_pepp_marg_soya_fat     | 1.73                                     | 0.37       | 0.44        | 0.75        | 13-548                                                                                    | 19.5       | 13-524   | 19.5       | 13-526   | 19.5       | 13-525   | 19.5       | 13-537 | 19.5       | 12-503 | 2.5        |        |            |        |            |          |            |         |             |         |             |  |
| veg_pepp_marg_soya_lowfat  | 1.18                                     | 0.25       | 0.29        | 0.49        | 13-548                                                                                    | 19.5       | 13-524   | 19.5       | 13-526   | 19.5       | 13-525   | 19.5       | 13-537 | 19.5       | 12-499 | 2.5        |        |            |        |            |          |            |         |             |         |             |  |
| veg_pepp_marg_soya_vlowfat | 1.18                                     | 0.25       | 0.29        | 0.49        | 13-548                                                                                    | 19.5       | 13-524   | 19.5       | 13-526   | 19.5       | 13-525   | 19.5       | 13-537 | 19.5       | 12-499 | 2.5        |        |            |        |            |          |            |         |             |         |             |  |
| veg_pepp_oil_olive         | 2.75                                     | 0.39       | 1.83        | 0.32        | 13-548                                                                                    | 19.5       | 13-524   | 19.5       | 13-526   | 19.5       | 13-525   | 19.5       | 13-537 | 19.5       | 17-038 | 2.5        |        |            |        |            |          |            |         |             |         |             |  |
| veg_pepp_oil_other         | 2.44                                     | 0.31       | 1.00        | 0.93        | 13-548                                                                                    | 19.5       | 13-524   | 19.5       | 13-526   | 19.5       | 13-525   | 19.5       | 13-537 | 19.5       | 17-033 | 0.75       | 17-040 | 0.5        | 17-686 | 0.938      | 17-377   | 0.312      |         |             |         |             |  |
| veg_pepp_oil_rapeseed      | 2.75                                     | 0.20       | 1.48        | 0.85        | 13-548                                                                                    | 19.5       | 13-524   | 19.5       | 13-526   | 19.5       | 13-525   | 19.5       | 13-537 | 19.5       | 17-041 | 2.5        |        |            |        |            |          |            |         |             |         |             |  |
| veg_pepp_oil_sunflower     | 2.75                                     | 0.34       | 0.51        | 1.70        | 13-548                                                                                    | 19.5       | 13-524   | 19.5       | 13-526   | 19.5       | 13-525   | 19.5       | 13-537 | 19.5       | 17-045 | 2.5        |        |            |        |            |          |            |         |             |         |             |  |
| veg_pepp_oil_veg           | 2.75                                     | 0.20       | 1.48        | 0.85        | 13-548                                                                                    | 19.5       | 13-524   | 19.5       | 13-526   | 19.5       | 13-525   | 19.5       | 13-537 | 19.5       | 17-686 | 2.5        |        |            |        |            |          |            |         |             |         |             |  |
| veg_pepp_s_dairy_chol      | 1.23                                     | 0.28       | 0.43        | 0.36        | 13-548                                                                                    | 19.5       | 13-524   | 19.5       | 13-526   | 19.5       | 13-525   | 19.5       | 13-537 | 19.5       | 12-497 | 2.5        |        |            |        |            |          |            |         |             |         |             |  |
| veg_pepp_s_dairy_dunno     | 1.50                                     | 0.35       | 0.59        | 0.39        | 13-548                                                                                    | 19.5       | 13-524   | 19.5       | 13-526   | 19.5       | 13-525   | 19.5       | 13-537 | 19.5       | 12-497 | 1.25       | 12-504 | 1.25       |        |            |          |            |         |             |         |             |  |
| veg_pepp_s_dairy_fat       | 1.77                                     | 0.43       | 0.75        | 0.41        | 13-548                                                                                    | 19.5       | 13-524   | 19.5       | 13-526   | 19.5       | 13-525   | 19.5       | 13-537 | 19.5       | 12-504 | 2.5        |        |            |        |            |          |            |         |             |         |             |  |
| veg_pepp_s_dairy_lowfat    | 1.23                                     | 0.28       | 0.43        | 0.36        | 13-548                                                                                    | 19.5       | 13-524   | 19.5       | 13-526   | 19.5       | 13-525   | 19.5       | 13-537 | 19.5       | 12-497 | 2.5        |        |            |        |            |          |            |         |             |         |             |  |
| veg_pepp_s_dairy_vlowfat   | 1.23                                     | 0.28       | 0.43        | 0.36        | 13-548                                                                                    | 19.5       | 13-524   | 19.5       | 13-526   | 19.5       | 13-525   | 19.5       | 13-537 | 19.5       | 12-497 | 2.5        |        |            |        |            |          |            |         |             |         |             |  |
| veg_pepp_s_dunno_chol      | 1.20                                     | 0.26       | 0.36        | 0.43        | 13-548                                                                                    | 19.5       | 13-524   | 19.5       | 13-526   | 19.5       | 13-525   | 19.5       | 13-537 | 19.5       | 12-499 | 1.25       | 12-497 | 1.25       |        |            |          |            |         |             |         |             |  |
| veg_pepp_s_dunno_dunno     | 1.48                                     | 0.33       | 0.48        | 0.50        | 13-548                                                                                    | 19.5       | 13-524   | 19.5       | 13-526   | 19.5       | 13-525   | 19.5       | 13-537 | 19.5       | 12-499 | 0.625      | 12-503 | 0.625      | 12-497 | 0.625      | 12-504   | 0.625      |         |             |         |             |  |
| veg_pepp_s_dunno_fat       | 1.75                                     | 0.40       | 0.60        | 0.58        | 13-548                                                                                    | 19.5       | 13-524   | 19.5       | 13-526   | 19.5       | 13-525   | 19.5       | 13-537 | 19.5       | 12-503 | 1.25       | 12-504 | 1.25       |        |            |          |            |         |             |         |             |  |
| veg_pepp_s_dunno_lowfat    | 1.20                                     | 0.26       | 0.36        | 0.43        | 13-548                                                                                    | 19.5       | 13-524   | 19.5       | 13-526   | 19.5       | 13-525   | 19.5       | 13-537 | 19.5       | 12-499 | 1.25       | 12-497 | 1.25       |        |            |          |            |         |             |         |             |  |
| veg_pepp_s_dunno_vlowfat   | 1.20                                     | 0.26       | 0.36        | 0.43        | 13-548                                                                                    | 19.5       | 13-524   | 19.5       | 13-526   | 19.5       | 13-525   | 19.5       | 13-537 | 19.5       | 12-499 | 1.25       | 12-497 | 1.25       |        |            |          |            |         |             |         |             |  |
| veg_pepp_s_olive_chol      | 1.23                                     | 0.26       | 0.54        | 0.28        | 13-548                                                                                    | 19.5       | 13-524   | 19.5       | 13-526   | 19.5       | 13-525   | 19.5       | 13-537 | 19.5       | 12-498 | 2.5        |        |            |        |            |          |            |         |             |         |             |  |
| veg_pepp_s_olive_dunno     | 1.48                                     | 0.31       | 0.66        | 0.34        | 13-548                                                                                    | 19.5       | 13-524   | 19.5       | 13-526   | 19.5       | 13-525   | 19.5       | 13-537 | 19.5       | 12-498 | 1.25       | 12-505 | 1.25       |        |            |          |            |         |             |         |             |  |
| veg_pepp_s_olive_fat       | 1.73                                     | 0.37       | 0.78        | 0.41        | 13-548                                                                                    | 19.5       | 13-524   | 19.5       | 13-526   | 19.5       | 13-525   | 19.5       | 13-537 | 19.5       | 12-505 | 2.5        |        |            |        |            |          |            |         |             |         |             |  |
| veg_pepp_s_olive_lowfat    | 1.23                                     | 0.26       | 0.54        | 0.28        | 13-548                                                                                    | 19.5       | 13-524   | 19.5       | 13-526   | 19.5       | 13-525   | 19.5       | 13-537 | 19.5       | 12-498 | 2.5        |        |            |        |            |          |            |         |             |         |             |  |
| veg_pepp_s_olive_vlowfat   | 1.23                                     | 0.26       | 0.54        | 0.28        | 13-548                                                                                    | 19.5       | 13-524   | 19.5       | 13-526   | 19.5       | 13-525   | 19.5       | 13-537 | 19.5       | 12-498 | 2.5        |        |            |        |            |          |            |         |             |         |             |  |
| veg_pulses                 | 1.20                                     | 0.14       | 0.24        | 0.53        | 41302120                                                                                  | 50         | 41305000 | 25         | 13-559   | 25         |          |            |        |            |        |            |        |            |        |            |          |            |         |             |         |             |  |
| veg_saladmayo              | 14.55                                    | 1.34       | 7.84        | 4.60        | 15-636                                                                                    | 33.4       | 15-635   | 33.3       | 13-636   | 9.99       | 14-346   | 14.985     | 14-879 | 3.33       | 17-654 | 4.995      |        |            |        |            |          |            |         |             |         |             |  |
| veg_sidesalad              | 0.10                                     | 0.02       | 0.02        | 0.05        | 13-520                                                                                    | 25         | 13-517   | 50         | 13-245   | 25         |          |            |        |            |        |            |        |            |        |            |          |            |         |             |         |             |  |
| veg_spinach                | 0.87                                     | 0.16       | 0.00        | 0.37        | 72125212                                                                                  | 100        |          |            |          |            |          |            |        |            |        |            |        |            |        |            |          |            |         |             |         |             |  |
| veg_sprouts                | 0.40                                     | 0.09       | 0.03        | 0.22        | 13-630                                                                                    | 100        |          |            |          |            |          |            |        |            |        |            |        |            |        |            |          |            |         |             |         |             |  |
| veg_sweetcorn              | 0.60                                     | 0.13       | 0.07        | 0.27        | 13-634                                                                                    | 100        |          |            |          |            |          |            |        |            |        |            |        |            |        |            |          |            |         |             |         |             |  |
| veg_sweetpot               | 0.30                                     | 0.14       | 0.00        | 0.09        | 13-672                                                                                    | 50         | 13-646   | 50         |          |            |          |            |        |            |        |            |        |            |        |            |          |            |         |             |         |             |  |
| veg_tomato_fresh           | 0.30                                     | 0.07       | 0.07        | 0.13        | 13-517                                                                                    | 50         | 13-519   | 50         |          |            |          |            |        |            |        |            |        |            |        |            |          |            |         |             |         |             |  |
| veg_tomato_tinned          | 1.65                                     | 0.22       | 0.73        | 0.60        | 13-530                                                                                    | 50         | 13-518   | 48.5       | 17-045   | 0.75       | 17-038   | 0.75       |        |            |        |            |        |            |        |            |          |            |         |             |         |             |  |
| veg_turnip                 | 0.15                                     | 0.00       | 0.00        | 0.10        | 13-391                                                                                    | 50         | 13-650   | 50         |          |            |          |            |        |            |        |            |        |            |        |            |          |            |         |             |         |             |  |
| veg_watercress             | 0.39                                     | 0.06       | 0.01        | 0.17        | 72125100                                                                                  | 100        |          |            |          |            |          |            |        |            |        |            |        |            |        |            |          |            |         |             |         |             |  |
| vegalt_burger              | 7.75                                     | 1.39       | 3.64        | 1.91        | 41305000                                                                                  | 23.75      | 41302120 | 23.75      | 17-041   | 2.5        | 15-658   | 50         |        |            |        |            |        |            |        |            |          |            |         |             |         |             |  |
| vegalt_other               | 19.25                                    | 2.82       | 7.40        | 7.99        | 13-505                                                                                    | 11.25      | 14-879   | 11.25      | 42104200 | 11.25      | 41305000 | 22.5       | 17-038 | 3          | 11-792 | 4.5        | 12-940 | 4.5        | 17-377 | 6.75       | 41302120 | 22.5       | 14-844  | 1.125       | 17-045  | 1.375       |  |
| vegalt_quorn               | 7.71                                     | 0.96       | 1.55        | 4.83        | 13-505                                                                                    | 55         | 17-377   | 20         | 12-960   | 10         | 17-045   | 7.5        | 11-886 | 7.5        |        |            |        |            |        |            |          |            |         |             |         |             |  |
| vegalt_tofu                | 6.10                                     | 0.82       | 1.31        | 3.61        | 41420010                                                                                  | 97.5       | 17-045   | 2.5        |          |            |          |            |        |            |        |            |        |            |        |            |          |            |         |             |         |             |  |
| yeast_extract              | 0.40                                     | 0.00       | 0.00        | 0.00        | 17-517                                                                                    | 100        |          |            |          |            |          |            |        |            |        |            |        |            |        |            |          |            |         |             |         |             |  |
| yogurt_fullfat             | 4.44                                     | 2.92       | 1.11        | 0.13        | 12-184                                                                                    | 40         | 12-375   | 40         | 12-555   | 20         |          |            |        |            |        |            |        |            |        |            |          |            |         |             |         |             |  |
| yogurt_lowfat              | 0.80                                     | 0.52       | 0.21        | 0.02        | 12-379                                                                                    | 75         | 12-532   | 25         |          |            |          |            |        |            |        |            |        |            |        |            |          |            |         |             |         |             |  |
| yorkshirepud               | 8.22                                     | 2.02       | 2.02        | 3.49        | 11-886                                                                                    | 25         | 12-940   | 15         | 12-596   | 38.5       | 12-307   | 16.5       | 17-045 | 5          |        |            |        |            |        |            |          |            |         |             |         |             |  |

FA, fatty acid; MCW, McCance and Widdowson; MUFA, monounsaturated fatty acid; PUFA, polyunsaturated fatty acid; SFA, saturated fatty acid; USDA, US Department of Agriculture. <sup>1</sup> Calculated as the sum of total fat, total SFAs, total MUFAs, or total PUFAs for each of the foods assigned to the food item (fraction used multiplied by grams of total fat, total SFAs, total MUFAs, or total PUFAs per 100g of food). <sup>2</sup> Fractions in the individual FA dataset were based on fractions from the main dataset for the Oxford WebQ [17], which were determined by taking into account how each question was asked and the most likely food choices in the UK population. Fractions assigned to codes 1 to 11
